# Supplementary material
Source: publisher figshare collection journal article supplement (https://gsapubs.figshare.com/articles/dataset/_/28319519)
Supplement: Supplementary file 1 [file 1]

## Sheet: C and O Isotopes
Sample/section	Notes	Height (m), depth (-m), or sequence	Formation	Member	δ13C (‰; VPDB)	δ18O (‰; VPDB)	Sampling Site Latitude	Sampling Site Longitude
CF-1	-	0.35	Cheno	-	3.2	-10.7	51.4558	72.7858
CF-1C	repeat	0.35	Cheno	-	3	-10.4	51.4558	72.7858
CF-2	-	1.55	Cheno	-	3.2	-12.3	51.4558	72.7858
CF-2C	repeat	1.55	Cheno	-	4.1	-10.3	51.4558	72.7858
CF-3	-	2	Cheno	-	6.4	-9.7	51.4558	72.7858
CF-3C	repeat	2	Cheno	-	6.6	-9.2	51.4558	72.7858
CF-4	-	2.5	Cheno	-	5.6	-12.2	51.4558	72.7858
CF-4C	repeat	2.5	Cheno	-	6.5	-10	51.4558	72.7858
CF-5	-	6.3	Cheno	-	6.4	-10.1	51.4558	72.7858
CF-6	-	7.6	Cheno	-	7.2	-10.8	51.4558	72.7858
CF-7	-	8.9	Cheno	-	6.2	-11	51.4558	72.7858
CF-8	-	9.8	Cheno	-	6.5	-9.4	51.4558	72.7858
CF-9	-	11.8	Cheno	-	6.4	-8.8	51.4558	72.7858
CF-10	-	14.8	Cheno	-	6.7	-8.3	51.4558	72.7858
CF-10C	repeat	14.8	Cheno	-	6.2	-7.7	51.4558	72.7858
CF-11	-	15.8	Cheno	-	6.3	-7.9	51.4558	72.7858
MM2101	-	0.2	Lower Albanel	member A	7.26867	-6.46472	51.2796	73.3049
MM2101	-	0.9	Lower Albanel	member A	7.09142	-7.40157	51.2796	73.3049
MM2101	-	1.5	Lower Albanel	member A	6.18186	-6.65454	51.2796	73.3049
MM2101	-	1.6	Lower Albanel	member A	6.999	-7.04575	51.2796	73.3049
MM2101	-	2.3	Lower Albanel	member A	5.6566	-6.8131	51.2796	73.3049
MM2101	-	2.7	Lower Albanel	member A	6.68367	-6.95833	51.2796	73.3049
MM2101	-	3.1	Lower Albanel	member A	6.74499	-5.20563	51.2796	73.3049
MM2101	-	3.4	Lower Albanel	member A	6.60387	-7.45486	51.2796	73.3049
MM2101	-	3.6	Lower Albanel	member A	6.78896	-6.28735	51.2796	73.3049
MM2101	-	3.7	Lower Albanel	member A	6.78249	-8.05001	51.2796	73.3049
MM2101	-	3.8	Lower Albanel	member A	6.51316	-6.79431	51.2796	73.3049
MM2101	-	4	Lower Albanel	member A	6.78446	-6.74251	51.2796	73.3049
MM2101	-	4.5	Lower Albanel	member A	7.12277	-7.62969	51.2796	73.3049
MM2101	-	5	Lower Albanel	member A	7.13076	-7.52487	51.2796	73.3049
MM2101	-	5.2	Lower Albanel	member A	6.86146	-8.65204	51.2796	73.3049
MM2101	-	6	Lower Albanel	member A	7.10864	-7.59409	51.2796	73.3049
MM2101	-	6.3	Lower Albanel	member A	7.24384	-8.52783	51.2796	73.3049
MM2101	-	6.6	Lower Albanel	member A	6.57063	-6.50969	51.2796	73.3049
MM2102	-	A	Lower Albanel	Regolith	5.81204	-8.17942	51.2729	73.3227
MM2102	-	B	Lower Albanel	Regolith	5.63548	-9.18767	51.2729	73.3227
MM2102	-	C	Lower Albanel	Regolith	6.64384	-7.99179	51.2729	73.3227
MM2102	-	D	Lower Albanel	Regolith	6.52694	-6.94216	51.2729	73.3227
MM2102	-	E	Lower Albanel	Regolith	3.83936	-9.99882	51.2729	73.3227
MM2105	-	A	Lower Albanel	Regolith	6.11477	-7.08722	51.2572	73.3436
MM2105	-	B	Lower Albanel	Regolith	6.54566	-5.17998	51.2572	73.3436
MM2105	-	C	Lower Albanel	Regolith	4.79683	-8.95512	51.2572	73.3436
MM2105	-	D	Lower Albanel	Regolith	5.09752	-8.07557	51.2572	73.3436
MM2105	-	E	Lower Albanel	Regolith	6.54129	-8.00052	51.2572	73.3436
MM2105	-	F	Lower Albanel	member A	7.32912	-7.73969	51.2572	73.3436
MM2105	-	G	Lower Albanel	member A	5.96641	-6.98267	51.2572	73.3436
MM2105	-	H	Lower Albanel	member A	6.64377	-8.28258	51.2572	73.3436
MM2105	-	I	Lower Albanel	member A	7.10497	-5.39984	51.2572	73.3436
MM2105	-	J	Lower Albanel	member A	7.14551	-6.55787	51.2572	73.3436
MM2105	-	K	Lower Albanel	member A	6.20092	-8.34162	51.2572	73.3436
MM2105	-	L	Lower Albanel	member A	6.91944	-4.69525	51.2572	73.3436
MM2105	-	M	Lower Albanel	member A	7.29783	-7.24064	51.2572	73.3436
MM2105	-	N	Lower Albanel	member A	6.92836	-9.01916	51.2572	73.3436
MM2105	-	O	Lower Albanel	member A	5.89704	-6.19917	51.2572	73.3436
MM2105	-	P	Lower Albanel	member A	7.9912	-6.50917	51.2572	73.3436
MM2105	-	Q	Lower Albanel	member A	6.57616	-6.41984	51.2572	73.3436
MM2107	-	A	Lower Albanel	member A	6.86959	-8.49658	51.2131	73.4162
MM2107	-	B	Lower Albanel	member A	6.9792	-9.36222	51.2131	73.4162
MM2107	-	C	Lower Albanel	member A	6.53703	-8.24262	51.2131	73.4162
MM2107	-	D	Lower Albanel	member A	7.09596	-9.2145	51.2131	73.4162
MM2107	-	E	Lower Albanel	member A	7.49476	-8.75396	51.2131	73.4162
MM2107	-	F	Lower Albanel	member A	7.4532	-8.0724	51.2131	73.4162
MM2107	-	G	Lower Albanel	member A	7.3179	-9.04824	51.2131	73.4162
MM2107	-	H	Lower Albanel	member A	7.69619	-9.54899	51.2131	73.4162
MM2107	-	I	Lower Albanel	member A	6.09891	-8.69765	51.2131	73.4162
MM2107	-	J	Lower Albanel	member A	7.0315	-8.49465	51.2131	73.4162
MM2107	-	K	Lower Albanel	member A	2.91282	-9.95016	51.2131	73.4162
MM2107	-	L	Lower Albanel	member A	6.79652	-7.51056	51.2131	73.4162
MM2107	-	M	Lower Albanel	member A	6.6192	-7.59599	51.2131	73.4162
MM2107	-	N	Lower Albanel	member A	6.86023	-8.40684	51.2131	73.4162
MM2107	-	O	Lower Albanel	member A	7.22428	-8.65465	51.2131	73.4162
MM2107	-	P	Lower Albanel	member A	7.21694	-5.82968	51.2131	73.4162
MM2107	-	Q	Lower Albanel	member A	6.96736	-7.85019	51.2131	73.4162
MM2108	-	A	Lower Albanel	member A	5.80512	-5.98642	51.2789	73.3071
MM2108	-	B	Lower Albanel	member A	6.41713	-4.90312	51.2789	73.3071
MM2108	-	C	Lower Albanel	member A	6.59151	-5.54322	51.2789	73.3071
MM2108	-	D	Lower Albanel	member A	6.76051	-6.07226	51.2789	73.3071
MM2108	-	E	Lower Albanel	member A	6.44128	-6.53389	51.2789	73.3071
MM2108	-	F	Lower Albanel	member A	6.45492	-8.32796	51.2789	73.3071
MM2108	-	G	Lower Albanel	member A	7.22393	-6.52855	51.2789	73.3071
MM2108	-	H	Lower Albanel	member A	6.62277	-6.53237	51.2789	73.3071
MM2108	-	I	Lower Albanel	member A	7.84364	-6.20473	51.2789	73.3071
MM2108	-	J	Lower Albanel	member A	5.05552	-8.57974	51.2789	73.3071
MM2108	-	K	Lower Albanel	member A	6.74306	-7.18855	51.2789	73.3071
MM2108	-	L	Lower Albanel	member A	4.96913	-6.77842	51.2789	73.3071
MM2108	-	M	Lower Albanel	member A	5.79768	-7.88224	51.2789	73.3071
MI-11-1	-	-	Lower Albanel	member A	6	-17	-	-
MI-11-1	-	-	Lower Albanel	member A	6.6	-9.5	-	-
MI-12-2	-	-	Lower Albanel	member A	6.1	-9.9	-	-
MI-13-1	-	-	Lower Albanel	member A	6.4	-9.7	-	-
MI-10-1	-	-	Lower Albanel	member A	0.3	-9.6	-	-
MI-14-1	-	-	Lower Albanel	member A	6.1	-7.5	-	-
MI-14-3	-	-	Lower Albanel	member A	5.2	-8.3	-	-
MI-15-1	-	-	Lower Albanel	member A	6.7	-9.9	-	-
MI-16-1	-	-	Lower Albanel	member A	4.6	-10.7	-	-
MI-16-2	-	-	Lower Albanel	member A	5.3	-8.7	-	-
MI-16-5	-	-	Lower Albanel	member A	5.4	-7.9	-	-
MI-18-1	-	-	Lower Albanel	member A	4.8	-9.1	-	-
MI-18-2	-	-	Lower Albanel	member A	4.8	-8.5	-	-
MI-23-1	-	-	Lower Albanel	member A	5.6	-7.8	-	-
MI-18-3	-	-	Lower Albanel	member B	1	-8	-	-
MI-18-4	-	-	Lower Albanel	member B	1	-8.1	-	-
MI-12-1	-	-	Lower Albanel	member B	1.6	-5.5	-	-
MI-13-2	-	-	Lower Albanel	member B	0.8	-8.1	-	-
MI-19-1	-	-	Lower Albanel	member B	0.9	-12.1	-	-
MI-20-1	-	-	Lower Albanel	member B	1	-12.1	-	-
MI-20-1	-	-	Lower Albanel	member B	3.5	-8.9	-	-
MI-21-3	-	-	Lower Albanel	member B	3.8	-9.4	-	-
MI-6-1b	-	-	Lower Albanel	member C	2.4	-4.3	-	-
MI-21-1	-	-	Lower Albanel	member A	4	-9.3	-	-
MI-21-2	-	-	Lower Albanel	member A	6.1	-7.8	-	-
MI-21-4	-	-	Lower Albanel	member A	3.8	-9.4	-	-
MI-22-1	-	-	Lower Albanel	member A	4.3	-7.8	-	-
MI-23-2	-	-	Lower Albanel	member A	6.1	-7.6	-	-
LA-1	-	-	Lower Albanel	-	6.7	-9	-	-
LA-2	-	-	Lower Albanel	-	1.1	-4.9	-	-
LA-2A	-	-	Lower Albanel	-	-1.4	-4.1	-	-
MM2113	-	1.5	Upper Albanel	sandy dolostone member	1.02452	-6.11345	51.2278	72.82
MM2113	-	6	Upper Albanel	sandy dolostone member	1.1402	-6.80812	51.2278	72.82
MM2113	-	12	Upper Albanel	sandy dolostone member	1.1146	-5.79194	51.2278	72.82
MM2113	-	16	Upper Albanel	sandy dolostone member	1.12262	-6.16721	51.2278	72.82
MM2113	-	20.5	Upper Albanel	sandy dolostone member	1.09334	-5.6825	51.2278	72.82
MM2113	-	26.2	Upper Albanel	sandy dolostone member	1.09182	-6.0659	51.2278	72.82
MM2113	-	30	Upper Albanel	sandy dolostone member	0.934572	-5.87976	51.2278	72.82
MM2113	-	34.5	Upper Albanel	sandy dolostone member	0.976223	-6.24732	51.2278	72.82
MM2113	-	39	Upper Albanel	sandy dolostone member	0.884213	-5.8833	51.2278	72.82
MM2113	-	43.5	Upper Albanel	sandy dolostone member	1.1501	-6.22335	51.2278	72.82
MM2113	-	48.5	Upper Albanel	sandy dolostone member	0.684347	-6.73609	51.2278	72.82
MM2113	-	52	Upper Albanel	sandy dolostone member	0.888149	-5.29867	51.2278	72.82
MM2113	-	60	Upper Albanel	sandy dolostone member	1.25989	-6.99644	51.2278	72.82
MM2113	-	64.5	Upper Albanel	sandy dolostone member	0.951411	-6.47958	51.2278	72.82
MM2113	-	70.5	Upper Albanel	sandy dolostone member	1.21196	-6.59961	51.2278	72.82
MM2113	-	75	Upper Albanel	sandy dolostone member	0.876732	-6.1531	51.2278	72.82
MM2113	-	81	Upper Albanel	sandy dolostone member	0.93852	-6.46337	51.2278	72.82
MM2113	-	87	Upper Albanel	sandy dolostone member	1.19535	-7.16959	51.2278	72.82
MM2113	-	102	Upper Albanel	sandy dolostone member	1.11391	-6.58236	51.2278	72.82
MM2113	-	109	Upper Albanel	sandy dolostone member	0.986724	-5.5064	51.2278	72.82
MM2113	-	114	Upper Albanel	sandy dolostone member	1.01387	-6.63349	51.2278	72.82
MM2113	-	120	Upper Albanel	sandy dolostone member	0.990188	-6.00947	51.2278	72.82
MM2113	-	124.5	Upper Albanel	sandy dolostone member	0.824831	-6.78335	51.2278	72.82
MM2113	-	129	Upper Albanel	sandy dolostone member	1.20643	-5.94057	51.2278	72.82
MM2113	-	133.5	Upper Albanel	sandy dolostone member	1.22498	-6.87938	51.2278	72.82
MM2113	-	138	Upper Albanel	sandy dolostone member	1.06278	-7.4963	51.2278	72.82
MM2113	-	145.5	Upper Albanel	sandy dolostone member	1.25851	-6.28171	51.2278	72.82
MM2113	-	150	Upper Albanel	sandy dolostone member	1.02509	-7.49177	51.2278	72.82
MM2113	-	154.5	Upper Albanel	sandy dolostone member	1.28866	-6.52133	51.2278	72.82
MM2113	-	159	Upper Albanel	sandy dolostone member	1.2203	-8.14338	51.2278	72.82
MM2113	-	165	Upper Albanel	sandy dolostone member	1.1612	-7.33418	51.2278	72.82
MM2113	-	171.5	Upper Albanel	sandy dolostone member	1.17389	-7.01993	51.2278	72.82
MM2113	-	175.5	Upper Albanel	sandy dolostone member	0.835521	-7.54844	51.2278	72.82
MM2113	-	180	Upper Albanel	sandy dolostone member	0.95343	-6.65879	51.2278	72.82
MM2113	-	184.5	Upper Albanel	sandy dolostone member	0.869914	-5.4164	51.2278	72.82
MM2113	-	189	Upper Albanel	sandy dolostone member	1.09148	-5.34412	51.2278	72.82
MM2113	-	195	Upper Albanel	sandy dolostone member	1.05806	-7.68351	51.2278	72.82
MM2114	-	0.3	Upper Albanel	banded dolostone member	0.578732	-6.81863	51.1565	72.8984
MM2114	-	1.8	Upper Albanel	banded dolostone member	0.554784	-7.05918	51.1565	72.8984
MM2114	-	3	Upper Albanel	banded dolostone member	0.604101	-6.73841	51.1565	72.8984
MM2114	-	4.5	Upper Albanel	banded dolostone member	0.599858	-6.96606	51.1565	72.8984
MM2114	-	6	Upper Albanel	banded dolostone member	0.676416	-6.71495	51.1565	72.8984
MM2114	-	7.6	Upper Albanel	banded dolostone member	0.667035	-6.15094	51.1565	72.8984
MM2114	-	9	Upper Albanel	banded dolostone member	0.635366	-6.22836	51.1565	72.8984
MM2115	-	4.8	Upper Albanel	banded dolostone member	0.645602	-6.94334	51.1636	72.8646
MM2115	-	6	Upper Albanel	banded dolostone member	0.520298	-6.56044	51.1636	72.8646
MM2115	-	7.5	Upper Albanel	banded dolostone member	0.751605	-6.04884	51.1636	72.8646
MM2115	-	9	Upper Albanel	banded dolostone member	0.634862	-6.23641	51.1636	72.8646
MM2115	-	10.4	Upper Albanel	banded dolostone member	0.900522	-5.8729	51.1636	72.8646
MM2115	-	13	Upper Albanel	banded dolostone member	0.761077	-6.33298	51.1636	72.8646
MM2115	-	14.9	Upper Albanel	banded dolostone member	0.898231	-6.66766	51.1636	72.8646
MM2115	-	16.6	Upper Albanel	banded dolostone member	0.720711	-5.99092	51.1636	72.8646
MM2115	-	18	Upper Albanel	banded dolostone member	0.931788	-5.80294	51.1636	72.8646
MM2115	-	19.5	Upper Albanel	banded dolostone member	0.712874	-5.6592	51.1636	72.8646
MM2115	-	21	Upper Albanel	banded dolostone member	0.850557	-6.00141	51.1636	72.8646
MM2115	-	22.5	Upper Albanel	banded dolostone member	0.551499	-6.34528	51.1636	72.8646
MM2115	-	24	Upper Albanel	banded dolostone member	0.883884	-6.24381	51.1636	72.8646
MM2115	-	25.5	Upper Albanel	banded dolostone member	0.747403	-6.07774	51.1636	72.8646
MM2115	-	27	Upper Albanel	banded dolostone member	0.473312	-6.0426	51.1636	72.8646
MM2115	-	28.5	Upper Albanel	banded dolostone member	0.670042	-5.9761	51.1636	72.8646
MM2115	-	30	Upper Albanel	banded dolostone member	0.552469	-5.99798	51.1636	72.8646
MM2115	-	31.6	Upper Albanel	banded dolostone member	0.79853	-6.29289	51.1636	72.8646
MM2115	-	33	Upper Albanel	banded dolostone member	0.880976	-6.27446	51.1636	72.8646
MM2115	-	34.7	Upper Albanel	banded dolostone member	0.900806	-6.3497	51.1636	72.8646
MM2115	-	36	Upper Albanel	banded dolostone member	0.861623	-6.14187	51.1636	72.8646
MM2115	-	37.5	Upper Albanel	banded dolostone member	0.652635	-6.45094	51.1636	72.8646
MM2115	-	39.1	Upper Albanel	banded dolostone member	0.747609	-6.16368	51.1636	72.8646
MM2115	-	40.5	Upper Albanel	banded dolostone member	0.975509	-6.24168	51.1636	72.8646
MM2115	-	42	Upper Albanel	banded dolostone member	1.04969	-6.40522	51.1636	72.8646
MM2115	-	43.5	Upper Albanel	banded dolostone member	0.561205	-6.07994	51.1636	72.8646
MM2115	-	45	Upper Albanel	banded dolostone member	0.781569	-6.82422	51.1636	72.8646
MM2115	-	46.5	Upper Albanel	banded dolostone member	0.779688	-6.65093	51.1636	72.8646
MM2115	-	48	Upper Albanel	banded dolostone member	1.0692	-6.45624	51.1636	72.8646
MM2115	-	49.5	Upper Albanel	banded dolostone member	0.744663	-6.10775	51.1636	72.8646
MM2115	-	50.5	Upper Albanel	banded dolostone member	0.891835	-13.1383	51.1636	72.8646
MM2116	-	0	Upper Albanel	banded dolostone member	0.60043	-6.55848	51.1384	72.9141
MM2116	-	5	Upper Albanel	banded dolostone member	0.513482	-6.80524	51.1384	72.9141
MM2116	-	10	Upper Albanel	banded dolostone member	0.816395	-6.1599	51.1384	72.9141
MM2116	-	16.5	Upper Albanel	banded dolostone member	0.615499	-6.40216	51.1384	72.9141
MM2116	-	20	Upper Albanel	banded dolostone member	0.518648	-5.91684	51.1384	72.9141
MM2116	-	25	Upper Albanel	banded dolostone member	0.47087	-6.19196	51.1384	72.9141
MM2116	-	30	Upper Albanel	banded dolostone member	0.682005	-6.18448	51.1384	72.9141
MM2116	-	35	Upper Albanel	banded dolostone member	0.765068	-6.05915	51.1384	72.9141
MM2116	-	40	Upper Albanel	banded dolostone member	0.941991	-5.71721	51.1384	72.9141
MM2116	-	45	Upper Albanel	banded dolostone member	0.695508	-6.15281	51.1384	72.9141
MM2116	-	49	Upper Albanel	banded dolostone member	0.948155	-5.78136	51.1384	72.9141
MM2116	-	55	Upper Albanel	banded dolostone member	0.765929	-6.16053	51.1384	72.9141
MM2116	-	59	Upper Albanel	banded dolostone member	0.447605	-6.75727	51.1384	72.9141
1014-00-01	-	-9.5	Gaschet	-	8.088	-11.346	52.0169	71.7268
1014-00-01	-	-12.6	Gaschet	-	7.39	-4.572	52.0169	71.7268
1014-00-01	-	-13.8	Gaschet	-	6.326	-5.446	52.0169	71.7268
1014-00-01	-	-18	Gaschet	-	7.911	-4.251	52.0169	71.7268
1014-00-01	-	-19.7	Gaschet	-	7.902	-4.7	52.0169	71.7268
1014-00-01	-	-21	Gaschet	-	7.732	-4.105	52.0169	71.7268
1014-00-01	-	-24.5	Gaschet	-	7.586	-3.378	52.0169	71.7268
1014-00-01	-	-26	Gaschet	-	7.653	-3.099	52.0169	71.7268
1014-00-01	repeat	-26	Gaschet	-	7.783	-3.524	52.0169	71.7268
1014-00-01	-	-30.5	Gaschet	-	7.716	-3.987	52.0169	71.7268
1014-00-01	-	-32.2	Gaschet	-	7.648	-3.768	52.0169	71.7268
1014-00-01	-	-33	Gaschet	-	7.514	-3.936	52.0169	71.7268
1014-00-01	-	-36.8	Gaschet	-	7.698	-3.349	52.0169	71.7268
1014-00-01	-	-37.1	Gaschet	-	7.641	-2.533	52.0169	71.7268
1014-00-01	-	-42.7	Gaschet	-	7.711	-3.207	52.0169	71.7268
1014-00-01	-	-43.9	Gaschet	-	7.721	-3.15	52.0169	71.7268
1014-00-01	-	-48.1	Gaschet	-	7.545	-3.267	52.0169	71.7268
1014-00-01	-	-49.3	Gaschet	-	7.596	-3.632	52.0169	71.7268
1014-00-01	-	-54	Gaschet	-	7.426	-2.416	52.0169	71.7268
1014-00-01	-	-55	Gaschet	-	7.521	-2.92	52.0169	71.7268
1014-00-01	-	-60.3	Gaschet	-	7.698	-2.331	52.0169	71.7268
1014-00-01	-	-62.6	Gaschet	-	7.807	-2.372	52.0169	71.7268
1014-00-01	-	-65.4	Gaschet	-	7.756	-3.203	52.0169	71.7268
1014-00-01	-	-66.5	Gaschet	-	7.766	-2.851	52.0169	71.7268
1014-00-01	-	-69.1	Gaschet	-	8.064	-2.881	52.0169	71.7268
1014-00-01	repeat	-69.1	Gaschet	-	8.577	-4.071	52.0169	71.7268
1014-00-01	-	-69.15	Gaschet	-	7.786	-2.866	52.0169	71.7268
1014-00-01	repeat	-69.15	Gaschet	-	8.642	-3.817	52.0169	71.7268
1014-00-01	-	-70.7	Gaschet	-	7.677	-2.439	52.0169	71.7268
1014-00-01	-	-72.1	Gaschet	-	7.681	-3.314	52.0169	71.7268
1014-00-01	repeat	-72.1	Gaschet	-	7.782	-2.72	52.0169	71.7268
1014-00-01	-	-76.6	Gaschet	-	7.767	-2.849	52.0169	71.7268
1014-00-01	-	-77.6	Gaschet	-	4.652	-9.611	52.0169	71.7268
1014-00-02	-	-8.7	Gaschet	-	3.4556	-9.87954	52.016	71.727
1014-00-02	-	-9.1	Gaschet	-	3.651	-8.45	52.016	71.727
1014-00-02	-	-9.15	Gaschet	-	1.347	-8.403	52.016	71.727
1014-00-02	-	-10.4	Gaschet	-	7.594	-8.275	52.016	71.727
1014-00-02	-	-10.4	Gaschet	-	7.957	-8.878	52.016	71.727
1014-00-02	-	-14.8	Gaschet	-	7.565	-10.508	52.016	71.727
1014-00-02	-	-17.3	Gaschet	-	7.995	-8.776	52.016	71.727
1014-00-02	-	-18.1	Gaschet	-	7.988	-8.66	52.016	71.727
1014-00-02	repeat	-18.1	Gaschet	-	7.954	-8.611	52.016	71.727
1014-00-02	-	-21	Gaschet	-	8.541	-5.778	52.016	71.727
1014-00-02	-	-23.3	Gaschet	-	8.582	-5.856	52.016	71.727
1014-00-02	-	-26	Gaschet	-	8.447	-6.589	52.016	71.727
1014-00-02	-	-27.1	Gaschet	-	8.342	-5.842	52.016	71.727
1014-00-02	-	-29.5	Gaschet	-	7.825	-4.345	52.016	71.727
1014-00-02	-	-32	Gaschet	-	7.785	-4.321	52.016	71.727
1014-00-02	-	-33.5	Gaschet	-	7.826	-3.896	52.016	71.727
1014-00-02	-	-36.4	Gaschet	-	7.652	-4.555	52.016	71.727
1014-00-02	-	-38.2	Gaschet	-	8.071	-9.799	52.016	71.727
1014-00-02	-	-38.2	Gaschet	-	8.054	-6.183	52.016	71.727
1014-00-02	-	-42.2	Gaschet	-	7.676	-5.44	52.016	71.727
1014-00-02	-	-43	Gaschet	-	7.09	-9.878	52.016	71.727
1014-00-02	-	-46.8	Gaschet	-	7.478	-15.117	52.016	71.727
1014-00-02	-	-47	Gaschet	-	7.32	-4.501	52.016	71.727
1014-00-02	-	-48.6	Gaschet	-	7.592	-3.628	52.016	71.727
1014-00-02	-	-51	Gaschet	-	7.533	-3.57	52.016	71.727
1014-00-02	-	-52.5	Gaschet	-	7.557	-3.647	52.016	71.727
1014-00-02	-	-55	Gaschet	-	5.81	-6.994	52.016	71.727
1014-00-02	-	-56.5	Gaschet	-	4.24	-8.097	52.016	71.727
1014-00-02	-	-64	Gaschet	-	7.637	-7.217	52.016	71.727
1014-00-02	repeat	-64	Gaschet	-	6.568	-7.067	52.016	71.727
1014-00-02	repeat	-64	Gaschet	-	7.349	-6.71	52.016	71.727
1014-00-02	-	-65.8	Gaschet	-	7.26	-6.59	52.016	71.727
1014-00-02	-	-66.5	Gaschet	-	7.07	-6.636	52.016	71.727
1014-00-02	-	-67.5	Gaschet	-	3.881	-8.158	52.016	71.727
1014-00-02	-	-69.8	Gaschet	-	4.495	-7.763	52.016	71.727
1014-00-02	-	-70.8	Gaschet	-	1.5622	-10.2366	52.016	71.727
1014-00-04	-	-15	Gaschet	-	2.873	-8.633	52.0153	71.7269
1014-00-04	-	-17	Gaschet	-	7.218	-9.048	52.0153	71.7269
1014-00-04	-	-44	Gaschet	-	5.513	-9.237	52.0153	71.7269
1014-00-04	repeat	-44	Gaschet	-	4.867	-8.275	52.0153	71.7269
1014-00-04	-	-45.3	Gaschet	-	3.254	-8.455	52.0153	71.7269
1014-00-05	-	-7.5	Gaschet	-	7.886	-14.325	52.0137	71.7262
1014-00-05	-	-46.8	Gaschet	-	2.219	-17.828	52.0137	71.7262
1014-00-05	-	-59.5	Gaschet	-	1.404	-15.997	52.0137	71.7262
1014-00-05	-	-60.8	Gaschet	-	1.217	-18.026	52.0137	71.7262
1014-00-12	-	-6.8	Gaschet	-	7.716	-2.119	52.0122	71.724
1014-00-16	-	-21	Gaschet	-	8.585	-12.45	52.0106	71.7255
1014-00-16	repeat	-21	Gaschet	-	8.517	-12.482	52.0106	71.7255
1014-00-16	repeat	-21	Gaschet	-	8.642	-8.578	52.0106	71.7255
1014-00-16	repeat	-21	Gaschet	-	8.61	-8.631	52.0106	71.7255
OT-1	-	-	Gaschet	-	8	-6	Indicator Lake area
OT-2	-	-	Gaschet	-	8.1	-6.4	Indicator Lake area
34Z4	-	-	Gaschet	-	10.3	-6.5	-
12EC2	-	-	Gaschet	-	9.9	-5.5	Parizeau Lake area
36U8	-	-	Gaschet	-	8.6	-11	Pluto Lake area
SOQ-1	-	-	Gaschet	-	7.893	-4.27796	Indicator Lake area
PB-1	-	0.7	Gaschet	-	9.7	-6	52.3853	70.4267
PB-1C	repeat	0.7	Gaschet	-	9.6	-6.2	52.3853	70.4267
PB-2	-	1.4	Gaschet	-	10.1	-8.9	52.3853	70.4267
PB-2C	repeat	1.4	Gaschet	-	10	-11.8	52.3853	70.4267
PB-3	-	2.6	Gaschet	-	9.9	-6.9	52.3853	70.4267
PB-3C	repeat	2.6	Gaschet	-	10.0206	-5.66755	52.3853	70.4267
PB-4	-	4.1	Gaschet	-	9.9	-10.9	52.3853	70.4267
PB-4C	repeat	4.1	Gaschet	-	10.7	-10.1	52.3853	70.4267
PB-5	-	5.9	Gaschet	-	9.7	-12	52.3853	70.4267
PB-5C	repeat	5.9	Gaschet	-	9.7	-7.1	52.3853	70.4267
PB-6	-	7.1	Gaschet	-	9.5	-9.8	52.3853	70.4267
PB-6C	repeat	7.1	Gaschet	-	9.9	-7.4	52.3853	70.4267
PB-7	-	8.8	Gaschet	-	10.5	-11.7	52.3853	70.4267
PB-7C	repeat	8.8	Gaschet	-	10.2284	-10.0921	52.3853	70.4267
PB-8	-	10.4	Gaschet	-	11.4	-7.5	52.3853	70.4267
PB-8C	repeat	10.4	Gaschet	-	10.9536	-6.99408	52.3853	70.4267
PB-9	-	10.6	Gaschet	-	10.8	-7.9	52.3853	70.4267
PB-10	-	11.1	Gaschet	-	10.1	-5.9	52.3853	70.4267
PB-10C	repeat	11.1	Gaschet	-	10.1	-6.4	52.3853	70.4267

## Sheet: Re-Os Geochronology
	Unit:	Kallio Formation
	Sample:	06-17RAT
	Geographic location:	Roadcut along Route 167
	Lithology:	Ferruginous slate
	Latitude:	51.0186
	Longitude:	73.0156
	Sample	Re (ppb)	±2σ	Os (ppt)	±2σ	187Re/188Os	±2σ	187Os/188Os	±2SE	Rho
	A1	1.71587	0.00924506	88.3394	0.732774	149.601	1.84271	4.71444	0.0780693	0.601503
	A2	0.894653	0.00729749	66.0451	0.357077	89.2903	1.10418	2.94773	0.0384237	0.535936
	A3	22.1114	0.0834611	717.872	6.99393	372.689	3.33367	11.7113	0.158064	0.544735
	A3 R	22.0027	0.085767	683.094	2.43107	413.584	2.1637	12.8891	0.0553818	0.541616
	A3-2	23.9283	0.09019	745.751	1.61129	411.557	1.76464	12.8677	0.0344008	0.364465
	A3-2 R	24.67	0.09583	753.704	2.59953	435.482	2.22089	13.6282	0.0558666	0.522296
	A4	1.22462	0.00798064	77.1336	0.421019	110.715	1.20326	3.5553	0.0427767	0.578498
	A5	0.847895	0.00716782	63.9647	0.22627	82.0876	0.90095	2.313	0.0201391	0.512715
	A6	0.561328	0.00666684	53.8698	0.213822	62.5531	0.899039	2.01146	0.0210862	0.434773

## Sheet: Zircon U-Pb (LA ICP MS)
	Unit:	Lower Albanel Formation
	Sample:	MM2103A
	Geographic location:	Northwestern Lac Mistassini near mouth of Riviere Wabissinane
	Lithology:	Immature sandstone with quartz pebble lag overlying crystalline basement of the Superior Craton and underlying stromatolitic dolostone of the Lower Albanel Formation.
	Latitude:	51.2721
	Longitude:	73.3246
		Isotope ratios					Age estimates (Ma)						Concentrations
		Tera-Wasserburg output
	Analysis_#	238/206	2SE	207/206	2SE		Pb207 Pb206	2SE	Pb206 U238	2SE	% Discordant		Th/U	U*	Th*	Pbtot*		204 cps
	MM2103A_01	1.87636	0.0872534	0.176683	0.00368775		2621	34	2754	102	5.0744		1.97724	219.417	433.842	13769.7		18.7742
	MM2103A_02	1.8361	0.0440833	0.182278	0.00415552		2673	37	2803	53	4.86345		0.453762	449.965	204.177	7825.54		9.27736
	MM2103A_03	2.429	0.0797292	0.131726	0.0028838		2120	38	2223	60	4.85849		0.565038	248.884	140.629	5045.38		17.1953
	MM2103A_04	2.85396	0.125921	0.184012	0.0063604		2689	56	1936	72	-28.003		14.4505	296.061	4278.24	14539.3		66.2784
	MM2103A_05	1.94119	0.0671385	0.178682	0.00535067		2640	49	2679	74	1.47727		0.364157	104.683	38.1209	1532.09		0.571043
	MM2103A_06	1.85997	0.0622684	0.190456	0.00572465		2745	48	2774	74	1.05647		0.728269	203.391	148.124	5971.74		-6.27601
	MM2103A_07	2.0498	0.0704252	0.175729	0.00459378		2612	43	2561	71	-1.95253		1.89005	170.19	321.668	11584.6		7.23136
	MM2103A_08	2.13743	0.100681	0.161298	0.0061885		2469	64	2474	95	0.202511		1.17858	265.986	313.485	6310.57		4.81164
	MM2103A_09	1.939	0.0529978	0.184202	0.00415979		2690	37	2681	59	-0.334572		1.09002	304.104	331.481	10064.6		-13.9082
	MM2103A_10	1.98301	0.0535284	0.158323	0.0041362		2437	43	2632	57	8.00164		0.337592	376.577	127.129	1958.69		-9.62723
	MM2103A_11	2.00921	0.0735427	0.185817	0.00666101		2705	58	2604	77	-3.73383		0.378108	86.205	32.5948	421.385		-21.4631
	MM2103A_12	2.01821	0.0582774	0.170002	0.00492512		2557	48	2594	60	1.44701		0.401452	234.053	93.9609	1289.66		8.56711
	MM2103A_13	2.40129	0.0846658	0.16853	0.00513158		2542	50	2244	65	-11.7231		0.876684	416.596	365.223	4117.79		-22.2578
	MM2103A_14	1.95821	0.0535591	0.184474	0.00468507		2693	41	2659	58	-1.26253		0.450647	235.463	106.111	1392.37		-2.90246
	MM2103A_15	1.76653	0.0439516	0.177986	0.00329289		2633	30	2892	57	9.83669		0.924267	278.653	257.549	3247.34		-1.45451
	MM2103A_Spot 1 L	1.79788	0.0576739	0.187683	0.00518584		2721	45	2851	72	4.77766		0.462512	82.5151	38.1643	733.451		-12.8614
	MM2103A_Spot 2 L	2.04861	0.0728526	0.153171	0.00694948		2381	76	2563	74	7.64385		0.853403	19.7009	16.8128	280.803		-1.2741
	MM2103A_Spot 3 L	1.94503	0.0523026	0.181798	0.00470479		2669	42	2674	58	0.187336		0.550962	140.422	77.3673	1340.6		10.3639
	MM2103A_Spot 4 L	1.8546	0.0835945	0.178389	0.00462892		2637	42	2780	100	5.42283		0.514311	186.087	95.7069	1739.02		-8.61601
	MM2103A_Spot 5 L	1.8366	0.0461281	0.177584	0.0053074		2630	49	2802	56	6.53992		0.733131	75.3731	55.2583	1000.89		-0.976033
	MM2103A_Spot 6 L	1.81867	0.0471985	0.189718	0.00369274		2739	31	2825	58	3.13983		0.617608	86.0338	53.1351	1019.18		19.2146
	MM2103A_Spot 7 L	1.79845	0.0502295	0.195519	0.00516242		2788	42	2850	63	2.22382		0.918273	54.0055	49.5917	967.977		6.15574
	MM2103A_Spot 8 L	1.92506	0.0597497	0.179862	0.00899649		2651	81	2697	67	1.73519		2.21549	32.3919	71.7639	1226.63		3.80921
	MM2103A_Spot 9 L	1.81255	0.0486488	0.188855	0.00561062		2731	48	2832	60	3.69828		0.839903	89.2592	74.9691	1435.45		1.09106
	MM2103A_Spot 10 L	1.87062	0.0403013	0.198496	0.00584752		2813	47	2761	47	-1.84856		0.764296	92.6436	70.8072	1323.16		1.19064
	MM2103A_Spot 11 L	1.851	0.0745623	0.17801	0.006399		2634	59	2784	89	5.69476		2.47755	75.841	187.9	1828.64		5.03698
	MM2103A_Spot 12 L	1.98416	0.0754816	0.172908	0.00431468		2585	41	2631	81	1.7795		1.78751	120.311	215.056	2714.07		7.40622
	MM2103A_Spot 13 L	1.87959	0.0616827	0.194405	0.00801899		2779	66	2750	72	-1.04354		0.476512	44.1655	21.0454	390.638		1.09504
	MM2103A_Spot 14 L	1.93288	0.0530114	0.177408	0.00435551		2628	40	2688	59	2.28311		0.488201	69.7467	34.0504	521.522		-6.98698
	MM2103A_Spot 15 L	1.83344	0.0482261	0.191483	0.00619393		2754	52	2806	59	1.88816		0.6548	122.501	80.2137	1471.58		-3.83418
	MM2103A_Spot 16 L	1.73677	0.0572234	0.192045	0.00512582		2759	43	2932	76	6.27039		0.522448	69.523	36.3222	618.684		-20.6038
	MM2103A_Spot 17 L	1.80093	0.0511419	0.189187	0.00541354		2734	46	2847	64	4.13314		0.752881	98.0105	73.7902	898.774		3.56799
	MM2103A_Spot 18 L	1.91712	0.0447976	0.18954	0.00606783		2737	52	2706	51	-1.13263		1.66591	74.0675	123.39	1833.12		-7.38227
	MM2103A_Spot 19 L	1.84859	0.0393046	0.190341	0.00514102		2744	44	2787	47	1.56706		0.58662	105.393	61.8254	965.615		17.1943
	MM2103A_Spot 20 L	2.07923	0.0724704	0.189763	0.00544504		2739	46	2531	72	-7.59401		5.30572	82.9607	440.166	756.169		11.9726
	MM2103A_Spot 21 L	2.07521	0.0545613	0.165113	0.00355273		2508	35	2535	54	1.07656		0.60003	113.754	68.2558	816.392		4.45147
	MM2103A_Spot 22 L	1.75054	0.0505282	0.192978	0.0051959		2767	43	2913	66	5.27647		0.787675	227.54	179.228	2442.65		-4.85538
	MM2103A_Spot 23 L	2.30599	0.0739517	0.157598	0.00591524		2429	62	2322	61	-4.4051		1.03976	61.8349	64.2932	583.449		-4.96493
	MM2103A_Spot 24 L	1.82746	0.0401644	0.192861	0.00399705		2766	33	2814	49	1.73536		1.08031	364.558	393.835	4835.7		-17.8546
	MM2103A_Spot 25	1.82827	0.0524853	0.195949	0.00466428		2792	38	2813	64	0.752149		0.672436	180.555	121.412	1570.59		11.2597
	MM2103A_Spot 26	1.84149	0.0510251	0.19641	0.00524634		2796	43	2796	62	0		0.47439	183.404	87.0052	1174.49		7.84262
	MM2103A_Spot 27	1.87768	0.0560844	0.183827	0.00556116		2687	49	2752	66	2.41905		0.481113	149.231	71.7968	939.41		-7.13106
	MM2103A_Spot 28	2.71272	0.197624	0.149138	0.00607673		2335	68	2023	124	-13.3619		2.86207	198.328	567.63	4390.02		4.59888
	MM2103A_Spot 29	2.09441	0.0823978	0.174699	0.00471682		2602	44	2516	80	-3.30515		1.00062	171.845	171.952	1880.65		-3.5418
	MM2103A_Spot 30	2.19213	0.0859451	0.189527	0.00705648		2737	60	2423	78	-11.4724		1.53918	53.1615	81.8253	649.201		-20.9712
	MM2103A_Spot 31	1.81439	0.0706208	0.195636	0.00589556		2789	48	2830	87	1.47006		0.457605	64.0243	29.2979	403.257		16.9779
	MM2103A_Spot 32	1.96009	0.0655056	0.181654	0.00560153		2667	50	2657	71	-0.374953		1.01903	165.301	168.447	1740.37		-0.386462
	MM2103A_Spot 33	3.69981	0.21349	0.138799	0.00651635		2212	80	1542	78	-30.2893		1.12553	164.673	185.344	937.341		-21.8616
	MM2103A_Spot 34	1.83196	0.0520622	0.19896	0.00538203		2817	43	2808	63	-0.319489		0.888451	133.737	118.819	1547.09		-0.436131
	MM2103A_Spot 35	1.88997	0.0565797	0.194597	0.00502215		2781	41	2738	65	-1.54621		0.882397	132.474	116.895	1505.48		-12.7523
	MM2103A_Spot 36	3.81802	0.285031	0.14056	0.00777032		2233	94	1500	98	-32.8258		1.1568	289.019	334.338	2443.5		15.5499
	MM2103A_Spot 37	2.05917	0.0743795	0.182504	0.00532568		2675	47	2552	75	-4.59813		3.81637	202.109	771.323	1868.22		-19.4838
	MM2103A_Spot 38	1.86099	0.0434326	0.192363	0.00500146		2762	42	2772	52	0.362056		0.712223	124.139	88.4148	1199.5		7.8559
	MM2103A_Spot 39	1.82997	0.0928961	0.178946	0.00416878		2642	38	2810	113	6.35882		0.878677	228.489	200.768	3165.01		0.718813
	MM2103A_Spot 40	1.87544	0.0518918	0.188497	0.003411		2728	29	2755	61	0.989736		0.820087	321.877	263.968	3346.39		-5.10257
	MM2103A_Spot 41	1.87914	0.0583923	0.174499	0.00573866		2601	54	2751	68	5.76701		0.581213	172.643	100.343	1316.41		13.5345
	MM2103A_Spot 42	1.9273	0.0445692	0.183015	0.00480672		2680	43	2694	50	0.522388		0.703511	143.208	100.749	1113.69		6.44779
	MM2103A_Spot 43	1.82654	0.0589498	0.179842	0.003341		2651	30	2815	72	6.18634		0.657499	189.828	124.812	1343.98		-4.74668
	MM2103A_Spot 44	2.52908	0.0657028	0.132456	0.00374243		2130	48	2148	47	0.84507		0.701801	197.489	138.598	1252.53		-11.2728
	MM2103A_Spot 45	1.92696	0.0509335	0.196618	0.00381547		2798	31	2695	57	-3.6812		1.30438	163.547	213.328	2842.11		-2.58138
	MM2103A_Spot 46	1.93507	0.0676599	0.175003	0.00567921		2605	53	2685	75	3.07102		1.34825	157.615	212.504	2047.41		16.6274
	MM2103A_Spot 47	0.10478	0.0290005	0.991275	0.0812626		5224	113	15185	1583	190.678		2.32872	0.185914	0.432941	335.709		13.4117
	MM2103A_Spot 48	1.81724	0.0485437	0.20045	0.00580924		2829	46	2826	60	-0.106045		1.29558	126.591	164.009	1334.61		-12.0899
	MM2103A_Spot 49	1.86518	0.071557	0.179738	0.00410127		2650	37	2767	85	4.41509		1.22108	110.674	135.143	992.97		16.5356
	MM2103A_Spot 50	2.01075	0.064621	0.185116	0.00779143		2699	68	2602	67	-3.59392		1.22645	45.7357	56.0926	727.757		4.14851
	MM2103A_Spot 51	2.11995	0.0801374	0.17196	0.00572756		2576	55	2491	77	-3.29969		1.64591	131.437	216.334	2493.27		13.6996
	MM2103A_Spot 52	1.91738	0.0773842	0.189082	0.00763323		2733	65	2706	87	-0.987925		0.534177	243.14	129.88	1386.8		12.1825
	MM2103A_Spot 53	1.94657	0.0717895	0.159407	0.00571714		2449	59	2673	79	9.14659		0.504926	40.1865	20.2912	247.171		-15.1843
	MM2103A_Spot 54	2.55155	0.13355	0.176616	0.00800461		2621	74	2132	93	-18.657		0.631437	107.07	67.6078	771.463		-6.95115
	MM2103A_Spot 55	2.74	0.169509	0.152654	0.00431891		2375	47	2006	104	-15.5368		0.595139	308.269	183.463	1885.19		-13.8345
	MM2103A_Spot 56	2.18018	0.0788358	0.185992	0.00652397		2706	57	2434	72	-10.0517		1.06673	89.805	95.7981	898.547		8.97482
	MM2103A_Spot 57	2.07093	0.0859909	0.161038	0.0043232		2466	44	2540	85	3.00081		2.49462	146.926	366.526	1000.41		2.9217
	MM2103A_Spot 58	2.10037	0.0491517	0.162706	0.00391537		2483	40	2510	48	1.08739		0.460711	263.071	121.2	1451.76		-13.2095
	MM2103A_Spot 59	1.97117	0.0660769	0.176381	0.00649127		2618	60	2645	71	1.03132		1.14797	120.827	138.706	1299.8		11.8332
	MM2103A_Spot 60	1.8555	0.0581289	0.192883	0.00434236		2766	36	2779	69	0.469993		0.779691	127.814	99.6555	1330.48		9.71438
	MM2103A_Spot 61	1.83975	0.0488632	0.188362	0.00602098		2727	52	2798	59	2.60359		0.83648	86.8918	72.6833	923.193		-4.59008
	MM2103A_Spot 62	2.33506	0.082056	0.171363	0.00322836		2570	31	2298	67	-10.5837		0.603981	240.147	145.044	1224.32		-12.6662
	MM2103A_Spot 63	5.77678	0.558073	0.113223	0.00338334		1851	53	1029	90	-44.4084		0.95133	560.128	532.866	2225.27		2.02517
	MM2103A_Spot 64	1.87128	0.0377755	0.181995	0.0040322		2670	36	2760	44	3.37079		0.671629	279.019	187.397	2324.82		-4.98803
	MM2103A_Spot 65	1.8993	0.0526691	0.17268	0.00545408		2583	52	2727	60	5.57491		0.865981	51.2389	44.3719	557.461		8.18321
	MM2103A_Spot 66	2.24566	0.163708	0.171518	0.00969699		2572	93	2374	142	-7.69829		4.25116	481.624	2047.46	4918.9		-24.9971
	MM2103A_Spot 67	1.78441	0.0465268	0.18834	0.0039912		2727	34	2868	59	5.17052		0.522142	250.568	130.832	1813.44		-10.7714
	MM2103A_Spot 68	2.4349	0.110705	0.170247	0.00641966		2559	62	2218	84	-13.3255		1.05547	127.104	134.154	1326.11		1.4307
	MM2103A_Spot 69	1.87843	0.044513	0.194709	0.00473904		2782	39	2751	52	-1.11431		0.543389	117.007	63.5803	929.958		-2.47533
	MM2103A_Spot 70	2.32247	0.0859836	0.165229	0.00561682		2509	56	2308	70	-8.01116		1.75674	305.796	537.205	5369.45		5.69489
	MM2103A_Spot 71	1.95048	0.0527249	0.192071	0.00569341		2759	48	2668	58	-3.2983		0.706421	64.8009	45.7767	588.175		-4.05054
	MM2103A_Spot 72	6.2161	0.480189	0.0998233	0.00227408		1620	41	962	68	-40.6173		2.57856	935.956	2413.42	7129.77		6.4211
	MM2103A_Spot 73	1.8664	0.0569652	0.191344	0.00560412		2753	47	2766	67	0.472212		1.28874	107.148	138.086	1589.5		-7.89106
	MM2103A_Spot 74	2.44228	0.105708	0.182922	0.00591063		2679	52	2212	79	-17.4319		1.05186	99.826	105.003	1046.74		3.74301
	MM2103A_Spot 75	5.76081	0.316166	0.141849	0.00696681		2249	83	1032	51	-54.1129		9.66189	233.194	2253.09	1451.66		-10.9953
	MM2103A_Spot 76	2.10524	0.0950744	0.188098	0.00617151		2725	53	2505	92	-8.07339		1.26296	174.716	220.661	1830.26		-16.6189
	MM2103A_Spot 77	2.08799	0.0751415	0.187984	0.00509909		2724	44	2523	74	-7.37885		0.884403	169.55	149.95	1679.29		-11.314
	MM2103A_Spot 78	2.35804	0.0985557	0.167184	0.00628232		2529	62	2279	79	-9.88533		3.77853	125.587	474.533	1467.41		-3.93323
	MM2103A_Spot 79	1.83198	0.0495228	0.192601	0.00544776		2764	46	2808	60	1.5919		0.986238	158.175	155.998	1745.62		5.98882
	MM2103A_Spot 80	2.35144	0.127924	0.182173	0.00624649		2672	56	2284	103	-14.521		1.43238	53.1101	76.0738	805.764		-0.336498
	MM2103A_Spot 81	8.31878	0.483966	0.125316	0.0061115		2033	85	732	39	-63.9941		3.49118	354.606	1237.99	1758.14		34.4661
	MM2103A_Spot 82	2.53043	0.0906422	0.177757	0.00499831		2631	46	2147	64	-18.396		0.901736	105.258	94.9146	530.6		7.93298
	MM2103A_Spot 83	1.81936	0.0758623	0.177457	0.00438554		2629	40	2824	93	7.41727		1.69003	134.496	227.302	745.067		11.401
	MM2103A_Spot 84	2.48689	0.122802	0.158541	0.00752265		2439	79	2179	89	-10.6601		1.15511	165.46	191.124	1323.59		1.75159
	MM2103A_Spot 85	2.22048	0.0856118	0.17074	0.004824		2564	46	2397	76	-6.51326		1.16127	168.791	196.013	2815.85		-0.575684
	MM2103A_Spot 86	1.84903	0.0694995	0.186871	0.00798648		2714	69	2787	83	2.68976		3.75849	85.3018	320.606	1216.06		-11.5525
	MM2103A_Spot 87	1.95672	0.0860798	0.190227	0.00936667		2743	79	2661	94	-2.98943		0.79941	60.2382	48.155	305.417		-6.13162
	MM2103A_Spot 88	1.96742	0.0586316	0.185882	0.00490182		2705	43	2649	63	-2.07024		0.535135	173.19	92.6802	1426.43		-3.27267
	MM2103A_Spot 89	2.17372	0.0988606	0.186018	0.0065574		2707	57	2440	91	-9.86332		3.74187	137.309	513.792	2635.28		11.5369
	MM2103A_Spot 90	1.80512	0.06478	0.185317	0.00529483		2700	46	2842	81	5.25926		1.86129	204.199	380.074	5909.55		-4.21157
	MM2103A_Spot 91	2.12685	0.152589	0.157308	0.00851408		2426	90	2484	145	2.39077		4.50731	250.412	1128.69	7612.63		22.6011
	MM2103A_Spot 92	1.92285	0.0506377	0.189001	0.00546311		2733	47	2699	57	-1.24405		0.922363	55.9194	51.578	807.875		-2.53936
	MM2103A_Spot 93	1.93456	0.100124	0.171219	0.00856178		2569	82	2686	111	4.5543		1.93385	103.255	199.68	2867.4		-4.70093
	MM2103A_Spot 94	2.10879	0.0543776	0.185667	0.00604037		2703	53	2502	52	-7.43618		0.603573	100.6	60.7195	837.647		7.24508
	MM2103A_Spot 95	2.16943	0.0675473	0.161553	0.00542256		2471	56	2444	62	-1.09268		14.6841	180.885	2656.14	3167.81		-4.9153
	MM2103A_Spot 96	2.8386	0.170908	0.139685	0.00598653		2222	73	1946	99	-12.4212		2.40484	384.695	925.13	6737.12		24.974
	MM2103A_Spot 97	1.84798	0.0994434	0.177001	0.0087509		2624	81	2788	119	6.25		0.699574	152.652	106.791	1424.36		7.43836
	MM2103A_Spot 98	3.44492	0.104689	0.136137	0.00433281		2178	54	1643	43	-24.5638		0.621764	301.701	187.587	1162.37		-1.29172
	MM2103A_Spot 99	1.90669	0.0632264	0.192135	0.00649204		2760	54	2718	72	-1.52174		1.2718	121.619	154.675	2159.21		-12.8058
	MM2103A_Spot 100	2.18183	0.0836509	0.163029	0.00594601		2487	60	2432	76	-2.2115		0.397915	149.373	59.4377	734.53		-2.72677
	MM2103A_Spot 101	2.22156	0.0911738	0.196558	0.00663079		2797	54	2396	80	-14.3368		2.76076	52.1355	143.934	1069.19		-7.5361
	MM2103A_Spot 102	2.08481	0.0553829	0.162783	0.00497909		2484	51	2526	54	1.69082		23.3584	155.529	3632.92	3502.66		1.34438
	MM2103A_Spot 103	2.0611	0.0871857	0.177817	0.00706927		2632	65	2550	87	-3.1155		0.768788	155.038	119.191	1072.67		-6.89381
	MM2103A_Spot 104	2.97689	0.272543	0.117873	0.00454133		1923	68	1867	145	-2.91212		1.96689	650.988	1280.42	9761.76		15.2347
	MM2103A_Spot 105	1.83985	0.0627643	0.18522	0.00906532		2699	79	2798	76	3.66803		0.721976	29.2018	21.083	286.766		11.9996
	MM2103A_Spot 106	1.94191	0.119963	0.181321	0.0139683		2664	125	2678	133	0.525526		1.3366	16.9535	22.6601	323.093		3.37306
	MM2103A_Spot 107	1.92989	0.0786771	0.171297	0.00563596		2570	54	2691	88	4.70817		0.91762	51.6787	47.4214	618.375		-1.05462
	MM2103A_Spot 108	1.88077	0.0787703	0.197529	0.00520205		2805	42	2749	92	-1.99643		1.69456	82.2945	139.453	2004.38		-1.17103
	MM2103A_Spot 109	1.91754	0.104518	0.196123	0.0085217		2793	70	2706	118	-3.11493		1.75008	85.1348	148.993	1860.78		-0.60014
	MM2103A_Spot 110	2.92765	0.237739	0.127568	0.00456375		2064	62	1894	131	-8.23643		0.880221	481.324	423.672	1666.43		13.3969
	MM2103A_Spot 111	5.17707	0.321642	0.124457	0.00664643		2020	93	1138	64	-43.6634		2.61823	568.995	1489.76	3809.6		22.7328
	MM2103A_Spot 112	2.19645	0.110177	0.176648	0.00650611		2621	60	2419	99	-7.70698		2.37476	142.625	338.7	2207.75		7.22047
	MM2103A_Spot 113	2.27144	0.138593	0.167602	0.00746642		2533	73	2352	118	-7.14568		0.567394	97.8652	55.5281	703.387		4.55366
	MM2103A_Spot 114	2.01561	0.105282	0.187505	0.0080709		2720	70	2597	109	-4.52206		0.212159	73.1551	15.5205	208.039		8.25057
	MM2103A_Spot 115	3.09656	0.315601	0.142782	0.00822826		2260	97	1804	157	-20.177		1.20477	316.343	381.121	3019.36		18.8723
	MM2103A_Spot 116	3.27541	0.389482	0.116169	0.00488527		1897	74	1718	176	-9.43595		0.786511	441.092	346.923	3710.29		3.37197
	MM2103A_Spot 117	1.89725	0.119659	0.179229	0.00763373		2645	69	2729	138	3.1758		6.76849	114.166	772.734	1371.69		9.53379
	MM2103A_Spot 118	2.31611	0.111449	0.175587	0.00590526		2611	55	2314	92	-11.375		1.25923	225.188	283.562	2319.25		7.04729
	MM2103A_Spot 119	1.96452	0.0689935	0.19278	0.00662484		2765	55	2652	75	-4.0868		0.729034	175.282	127.786	1589.81		16.4166
	MM2103A_Spot 120	2.6945	0.211851	0.176212	0.00878005		2617	81	2035	134	-22.2392		1.69148	114.272	193.289	1120.14		19.6607
	MM2103A_Spot 121	2.88182	0.143976	0.181598	0.00621533		2667	56	1920	81	-28.009		2.02223	191.55	387.359	487.517		7.30478
	MM2103A_Spot 122	1.94617	0.058563	0.19516	0.00599747		2785	49	2673	65	-4.02154		0.709001	159.618	113.169	1380.85		-19.5002
	MM2103A_Spot 123	1.87161	0.0526588	0.200285	0.00764695		2828	61	2760	62	-2.40453		1.32865	38.0695	50.5811	657.009		-3.46907
	MM2103A_Spot 124	2.24739	0.0818418	0.151332	0.00412013		2360	46	2373	71	0.550847		6.87275	210.832	1449	1395.28		-4.30504
	MM2103A_Spot 125	1.96235	0.0641087	0.19268	0.00586729		2764	49	2655	70	-3.94356		0.473277	87.1473	41.2448	493.265		5.87315
	MM2103A_Spot 126	2.50259	0.0944861	0.12997	0.00402953		2097	53	2167	68	3.3381		1.55698	132.998	207.075	1333.85		-8.56272
	MM2103A_Spot 127	2.34373	0.0889098	0.1612	0.00563966		2468	58	2291	72	-7.1718		14.7526	142.579	2103.42	2684.99		39.9894
	MM2103A_Spot 128	2.1273	0.103777	0.183545	0.00600267		2684	53	2484	99	-7.45156		0.710807	89.3884	63.5379	859.566		6.14982
	MM2103A_Spot 129	1.98483	0.10574	0.199177	0.00773773		2819	62	2630	113	-6.70451		3.46155	39.9508	138.292	127.711		-5.03005
	MM2103A_Spot 130	3.39272	0.201382	0.131664	0.00558468		2119	73	1665	85	-21.4252		56.8238	247.593	14069.2	3809.98		5.17929
	MM2103A_Spot 131	2.39759	0.081006	0.176086	0.00623677		2616	58	2247	63	-14.1055		3.96969	146.672	582.244	1656.57		10.9169
	MM2103A_Spot 132	2.08413	0.0822359	0.17731	0.00660318		2627	61	2526	81	-3.84469		3.52864	92.1513	325.169	2775.34		8.67069
	MM2103A_Spot 133	1.83126	0.0968606	0.176135	0.00578515		2616	54	2809	118	7.37768		2.63823	108.419	286.036	3010.42		5.39872
	MM2103A_Spot 134	2.31933	0.0851188	0.186775	0.00783154		2713	68	2311	70	-14.8175		0.77154	131.549	101.495	1072.49		-15.5792
	MM2103A_Spot 135	2.03746	0.0672655	0.182702	0.00626996		2677	56	2574	69	-3.84759		0.483156	89.8437	43.4085	567.966		-4.92162
	MM2103A_Spot 136	1.98454	0.143741	0.18738	0.00769347		2719	66	2631	153	-3.23648		0.433252	51.2481	22.2033	248.723		-7.97233
	MM2103A_Spot 137	2.4117	0.119337	0.15541	0.00661074		2406	71	2236	92	-7.06567		2.40997	143.525	345.891	2838.11		-1.41382
	MM2103A_Spot 138	2.39522	0.129102	0.189016	0.00971806		2733	83	2249	100	-17.7095		0.816674	126.617	103.405	987.441		-3.9723
	MM2103A_Spot 139	2.26312	0.224881	0.1841	0.00938813		2689	83	2359	192	-12.2722		1.04657	198.863	208.125	1075.65		-5.48437
	MM2103A_Spot 140	2.09524	0.0908548	0.157393	0.00645585		2427	68	2515	88	3.62588		0.783564	97.8363	76.661	717.193		0.864921
	MM2103A_Spot 141	2.01003	0.0860144	0.180324	0.00358649		2655	32	2603	90	-1.95857		1.3168	171.015	225.192	1588.25		-3.17466
	MM2103A_Spot 142	2.54139	0.107372	0.135983	0.00656334		2176	82	2139	75	-1.70037		0.665962	33.5463	22.3406	204.37		0.87178
	MM2103A_Spot 143	1.78517	0.0591433	0.171727	0.00656119		2574	63	2867	75	11.3831		0.959108	149.017	142.923	1963.68		12.7286
	MM2103A_Spot 144	8.53402	1.26648	0.108458	0.00801773		1773	132	714	98	-59.7293		0.895377	1346.41	1205.54	3719.34		12.5371
	MM2103A_Spot 145	2.0147	0.087977	0.191075	0.00866524		2751	73	2598	92	-5.56161		0.798207	71.2636	56.883	600.379		22.8632
	MM2103A_Spot 146	1.96339	0.100743	0.190018	0.00851851		2742	72	2654	109	-3.20934		0.636958	48.5837	30.9457	146.344		-4.25817
	MM2103A_Spot 147	1.88581	0.0621518	0.188694	0.00535964		2730	46	2743	72	0.47619		0.808274	93.1002	75.2505	941.509		-2.92982
	MM2103A_Spot 148	3.7687	0.279896	0.134398	0.00469435		2155	60	1517	98	-29.6056		2.21965	357.892	794.394	5437.38		-0.918119
	MM2103A_Spot 149	2.45697	0.101777	0.176419	0.00674008		2619	62	2201	76	-15.9603		1.42464	83.1236	118.421	1254.5		12.8083
	MM2103A_Spot 150	2.39035	0.128839	0.158961	0.00630971		2444	66	2253	100	-7.81506		0.712107	202.395	144.127	1555.07		-3.95762
	MM2103A_Spot 151	2.1132	0.0792427	0.191047	0.00701945		2750	59	2498	76	-9.16364		1.64214	55.4623	91.0768	915.963		11.599
	MM2103A_Spot 152	1.80455	0.0714583	0.183429	0.00484307		2683	43	2842	89	5.9262		1.03261	108.136	111.662	1262.84		8.5109
	MM2103A_Spot 153	2.56195	0.227867	0.156069	0.00641431		2413	68	2124	158	-11.9768		0.652692	120.11	78.3947	789.169		7.24712
	MM2103A_Spot 154	2.53876	0.125611	0.183532	0.00632778		2684	56	2141	88	-20.231		1.01541	144.852	147.083	1223.94		5.324
	MM2103A_Spot 155	2.17878	0.101616	0.162604	0.00723644		2482	74	2435	93	-1.89363		7.12696	172.754	1231.21	2154.8		18.7475
	MM2103A_Spot 156	1.86692	0.0785174	0.168445	0.00459782		2541	45	2765	93	8.81543		1.28544	180.683	232.257	2657.45		-2.50814
	MM2103A_Spot 157	1.99566	0.125165	0.180649	0.00901858		2658	81	2618	132	-1.50489		1.07861	289.756	312.534	2977.09		1.91865
	MM2103A_Spot 158	2.23252	0.0938506	0.177528	0.00913226		2629	84	2386	82	-9.24306		1.68197	93.3992	157.095	1645.04		3.92304
	MM2103A_Spot 159	1.95043	0.114442	0.17564	0.0068054		2611	63	2668	126	2.18307		2.22769	51.1028	113.841	1239.47		9.04772
	MM2103A_Spot 160	1.80633	0.076962	0.194866	0.00641336		2783	53	2840	96	2.04815		0.456293	57.7285	26.3411	350.562		1.6928
	MM2103A_Spot 161	3.06428	0.24823	0.118841	0.00545879		1938	81	1821	126	-6.03715		0.793833	774.111	614.515	3760.1		-0.642872
	MM2103A_Spot 162	1.76653	0.0475011	0.19035	0.00523122		2744	44	2892	61	5.39359		0.733388	162.343	119.06	1674.31		12.2205
	MM2103A_Spot 163	1.99242	0.0566243	0.176462	0.00451003		2619	42	2622	60	0.114548		2.55923	129.736	332.023	4825.16		17.0042
	MM2103A_Spot 164	1.94417	0.0655979	0.184217	0.00685098		2690	60	2675	72	-0.557621		0.22551	104.149	23.4866	348.909		1.42734
	MM2103A_Spot 165	1.80431	0.0452055	0.190415	0.00570599		2745	48	2843	56	3.57013		0.663919	67.7272	44.9653	692.566		-7.78729
	MM2103A_Spot 166	1.7951	0.0691435	0.186652	0.00435296		2712	38	2855	87	5.27286		0.573046	345.353	197.903	3060.68		0.289632
	MM2103A_Spot 167	2.04156	0.0713865	0.173879	0.0059846		2595	56	2570	73	-0.963391		1.58222	133.923	211.897	2410.1		0.907708
	MM2103A_Spot 168	1.86242	0.0639171	0.174599	0.00504072		2601	47	2771	76	6.53595		1.74735	293.967	513.665	4028.96		-0.659633
	MM2103A_Spot 169	1.87824	0.0388873	0.190668	0.00486416		2747	41	2752	45	0.182017		0.471928	214.481	101.22	1500.73		7.78935
	MM2103A_Spot 170	1.90591	0.0588213	0.182566	0.0050271		2676	45	2719	67	1.60688		1.79682	92.3113	165.867	2391.86		-19.914
	MM2103A_Spot 171	1.9058	0.0590809	0.181212	0.00528714		2663	47	2719	67	2.10289		0.505954	157.674	79.7757	1101.38		-12.2526
	MM2103A_Spot 172	1.89956	0.0562158	0.181644	0.00741025		2667	66	2726	64	2.21222		0.858987	36.627	31.4622	464.89		-13.5841
	MM2103A_Spot 173	1.87865	0.0504209	0.188619	0.00356859		2729	31	2751	59	0.806156		0.662096	232.177	153.724	2190.87		-15.2593
	MM2103A_Spot 174	1.98436	0.0675905	0.181497	0.00523391		2666	47	2631	72	-1.31283		2.29924	62.3724	143.409	2100.11		-11.1593
	MM2103A_Spot 175	1.85671	0.0528029	0.187386	0.00616201		2719	53	2778	63	2.16992		0.757472	49.9296	37.8202	519.942		13.7956
	MM2103A_Spot 176	1.9412	0.063646	0.182675	0.00444078		2677	39	2679	70	0.0747105		1.71251	57.4942	98.4596	1349.95		-4.9205
	MM2103A_Spot 177	2.03395	0.089615	0.175395	0.00561901		2609	52	2578	92	-1.18819		1.56186	188.36	294.191	3220.44		-1.58471
	MM2103A_Spot 178	4.39932	0.304623	0.117319	0.00380066		1915	57	1320	81	-31.0705		0.997582	425.952	424.922	2842.47		3.01865
	MM2103A_Spot 179	1.98614	0.0732009	0.188523	0.00523871		2729	45	2629	78	-3.66435		1.14922	132.321	152.066	1749.51		-3.50527
	MM2103A_Spot 180	2.20246	0.0805955	0.171182	0.00583061		2568	56	2413	72	-6.03583		1.21046	111.516	134.985	1432.89		-5.58188
	MM2103A_Spot 181	1.99535	0.0664038	0.161238	0.00514974		2468	53	2619	70	6.11831		3.23827	141.176	457.165	1264.82		24.7521
	MM2103A_Spot 182	1.8053	0.0562082	0.17914	0.00612436		2644	56	2841	70	7.45083		2.10011	78.3729	164.592	1463.71		1.8803
	MM2103A_Spot 183	1.95639	0.0750817	0.172409	0.00697845		2580	66	2662	82	3.17829		1.15219	80.0099	92.187	1140.21		-5.52795
	MM2103A_Spot 184	2.07271	0.0437778	0.165466	0.00448471		2512	45	2538	43	1.03503		0.553748	278.31	154.114	1756.09		-16.2725
	MM2103A_Spot 185	5.70592	0.596623	0.11929	0.00462371		1945	68	1041	99	-46.4781		1.11378	675.632	752.508	3687.05		2.92278
	MM2103A_Spot 186	2.6246	0.14139	0.183098	0.00613171		2680	54	2081	94	-22.3507		1.22364	195.584	239.323	2108.67		-17.2497
	MM2103A_Spot 187	2.12548	0.0475485	0.163801	0.00359901		2495	36	2486	45	-0.360721		0.24406	223.661	54.5868	694.597		2.46347
	MM2103A_Spot 188	1.84022	0.0475914	0.188242	0.00441428		2726	38	2798	58	2.64123		0.930828	121.712	113.293	1465.05		-16.5286
	MM2103A_Spot 189	1.89872	0.0606233	0.186176	0.0046335		2708	40	2727	70	0.701625		1.76406	211.384	372.893	5187.91		12.4162
	MM2103A_Spot 190	1.8661	0.091209	0.178615	0.00516058		2639	47	2766	108	4.81243		2.3825	126.006	300.21	3753.31		13.2386
	MM2103A_Spot 191	1.87504	0.0579521	0.186759	0.00448031		2713	39	2755	68	1.5481		1.0075	99.6288	100.376	1496.64		-1.58118
	MM2103A_Spot 192	2.6423	0.12148	0.13525	0.00497818		2166	63	2069	80	-4.4783		1.14457	421.404	482.326	4632.07		16.9935
	MM2103A_Spot 193	2.72225	0.229217	0.155276	0.010478		2404	112	2017	143	-16.0982		0.987783	515.758	509.457	2497.33		6.58381
	MM2103A_Spot 194	1.89151	0.0695854	0.171007	0.00463282		2567	44	2736	80	6.58356		3.72222	207.439	772.135	1814.05		4.85109
	MM2103A_Spot 195	1.784	0.0746337	0.189765	0.0058064		2739	49	2869	95	4.74626		1.4006	97.3146	136.299	1479.81		-4.83304
	MM2103A_Spot 196	1.80839	0.0646612	0.200933	0.0085286		2833	68	2838	80	0.176491		1.71149	55.7887	95.4818	625.519		-6.25786
	MM2103A_Spot 197	2.43672	0.0905425	0.189472	0.00727279		2737	62	2217	68	-18.9989		1.51958	55.2778	83.999	702.414		-12.0952
	MM2103A_Spot 198	2.00853	0.0489646	0.177725	0.00554947		2631	51	2605	51	-0.988217		0.263383	176.482	46.4822	481.37		-20.2178
	MM2103A_Spot 199	1.85456	0.0619384	0.169822	0.00406045		2555	39	2780	74	8.80626		1.90742	179.808	342.97	3276.61		3.92895
	MM2103A_Spot 200	1.97555	0.0747707	0.177082	0.0058326		2625	54	2640	80	0.571429		1.41824	174.697	247.761	1387.5		-13.8583
	MM2103A_Spot 201	11.1327	0.744058	0.0846785	0.00318743		1307	72	555	35	-57.5363		3.09372	1097.16	3394.3	6168.02		8.95396
	MM2103A_Spot 202	1.83089	0.0536952	0.192496	0.00414019		2763	35	2809	65	1.66486		0.619972	133.206	82.584	1093.83		-0.163371
	MM2103A_Spot 203	3.91474	0.188799	0.130362	0.00415718		2102	55	1466	62	-30.2569		42.8831	316.002	13551.2	3027.05		29.6595
	MM2103A_Spot 204	1.90941	0.0560502	0.176299	0.00336401		2618	31	2715	64	3.70512		3.47245	112.968	392.275	2421.21		7.49647
	MM2103A_Spot 205	1.84766	0.0595355	0.184604	0.00431833		2694	38	2789	71	3.52635		1.19778	141.52	169.51	2238.56		-10.0745
	MM2103A_Spot 206	1.8451	0.0469649	0.182786	0.00471328		2678	42	2792	57	4.25691		1.34152	126.903	170.244	2127.08		6.12675
	MM2103A_Spot 207	5.16423	0.327618	0.113204	0.00343599		1851	54	1141	65	-38.3576		4.29678	737.231	3167.72	5816.08		15.9121
	MM2103A_Spot 208	1.92508	0.0635438	0.194629	0.00670373		2781	55	2697	71	-3.0205		0.60178	101.961	61.358	777.888		-10.2779
	MM2103A_Spot 209	3.50634	0.162228	0.167069	0.00729523		2528	72	1617	65	-36.0364		1.14195	342.326	390.92	2759.49		24.4499
	MM2103A_Spot 210	1.83845	0.0647718	0.178618	0.00634802		2639	58	2800	78	6.1008		0.708172	222.668	157.687	2134.11		-4.19298
	MM2103A_Spot 211	1.71817	0.0640214	0.181975	0.00563882		2670	50	2957	87	10.7491		0.653898	261.69	171.118	2636.4		22.3325
	MM2103A_Spot 212	2.02827	0.0445472	0.178802	0.00401285		2641	36	2584	46	-2.15827		0.497831	190.326	94.7501	1119.56		13.2127
	MM2103A_Spot 213	1.856	0.0851301	0.183012	0.00662323		2680	59	2778	101	3.65672		4.18815	102.136	427.76	900.288		1.84905
	MM2103A_Spot 214	1.92307	0.0491986	0.185226	0.00559474		2700	49	2699	55	-0.037037		1.90606	83.0594	158.316	2103.24		-7.38428
	MM2103A_Spot 215	2.22751	0.0835384	0.176975	0.00450801		2624	42	2391	73	-8.87957		1.70573	114.729	195.698	2451.21		1.06856
	MM2103A_Spot 216	1.92057	0.0452967	0.18269	0.00472798		2677	42	2702	51	0.933881		2.17476	124.938	271.71	3180.33		-5.07983
	MM2103A_Spot 217	2.01605	0.0988151	0.167126	0.0035972		2528	35	2597	103	2.72943		0.788119	222.982	175.737	2095.53		10.8702
	MM2103A_Spot 218	1.78257	0.0632364	0.18911	0.00537375		2734	46	2871	81	5.01097		0.628604	252.128	158.488	2431.24		-4.708
	MM2103A_Spot 219	1.84768	0.0570328	0.194311	0.00494723		2778	41	2789	68	0.395968		0.547656	100.638	55.1149	723.712		-1.18565
	MM2103A_Spot 220	5.83652	0.348836	0.121445	0.00435092		1977	63	1019	55	-48.4573		5.24015	532.08	2788.18	3833.01		6.89009
	MM2103A_Spot 221	1.90763	0.0678057	0.180057	0.00601744		2653	54	2717	77	2.41236		2.50362	101.98	255.319	2911.4		-10.0293
	MM2103A_Spot 222	9.12009	0.782789	0.0955665	0.00255098		1538	49	671	54	-56.3719		1.36719	1093.27	1494.71	3034.71		3.68305
	MM2103A_Spot 223	1.67908	0.0593282	0.187434	0.00517153		2719	45	3012	83	10.776		2.30396	150.356	346.413	2323.97		5.20022
	MM2103A_Spot 224	1.83331	0.0537947	0.195275	0.00514094		2786	42	2806	65	0.717875		0.942104	109.856	103.496	1368.52		7.11836
	MM2103A_Spot 225	2.69366	0.120786	0.153841	0.00493821		2388	54	2035	77	-14.7822		1.6736	276.724	463.126	2711.98		4.70922
	MM2103A_Spot 226	1.76968	0.0826333	0.190745	0.00628085		2748	53	2888	107	5.09461		0.629478	229.15	144.245	2287.7		11.9031
	MM2103A_Spot 227	1.89459	0.076433	0.176448	0.00809838		2619	75	2732	88	4.31462		1.55953	78.8648	122.992	1626.02		8.2247
	MM2103A_Spot 228	14.9406	1.87	0.101947	0.00437683		1659	78	418	50	-74.8041		8.68921	808.244	7023.01	5984.43		9.24961
	MM2103A_Spot 229	1.99813	0.100352	0.181599	0.00535238		2667	48	2616	106	-1.91226		1.03053	181.644	187.19	2294.6		17.9548
	MM2103A_Spot 230	2.12545	0.0953732	0.188954	0.0061695		2732	53	2486	91	-9.00439		0.930943	58.4377	54.4022	650.815		-1.61116
	MM2103A_Spot 231	2.37558	0.0815892	0.182797	0.00482545		2678	43	2265	64	-15.422		0.725316	97.8855	70.9979	657.316		-8.65045
	MM2103A_Spot 232	2.4586	0.081003	0.172798	0.00534024		2584	51	2200	60	-14.8607		1.77663	140.695	249.963	2357.06		6.3334
	MM2103A_Spot 233	6.87096	0.477979	0.128922	0.00535002		2083	72	876	56	-57.9453		2.40293	645.178	1550.32	3933.65		-5.28372
	MM2103A_Spot 234	2.52509	0.156885	0.139786	0.00760809		2224	92	2151	111	-3.28237		5.69951	335.439	1911.84	1513.25		2.29082
	MM2103A_Spot 235	1.73927	0.0422523	0.191204	0.00464086		2752	39	2928	56	6.39535		0.855799	268.74	229.987	3038.38		-0.205882
	MM2103A_Spot 236	1.933	0.0629669	0.175034	0.00536179		2606	50	2688	70	3.14658		0.441344	302.232	133.388	1293.36		7.75085
	MM2103A_Spot 237	1.92704	0.0454983	0.186231	0.00377627		2708	33	2695	51	-0.480059		0.779386	162.346	126.53	1316.6		7.8686
	MM2103A_Spot 238	1.8547	0.0363421	0.191551	0.00414071		2755	35	2780	43	0.907441		0.701791	151.529	106.342	1355.57		-12.3107
	MM2103A_Spot 239	4.34197	0.288087	0.121065	0.00288664		1971	42	1336	78	-32.2171		3.84522	589.035	2264.97	6264.64		-6.82407
	MM2103A_Spot 240	1.83613	0.0399215	0.187727	0.00369147		2722	32	2803	48	2.97575		0.662511	227.872	150.967	1982.01		-3.38544

## Sheet: Zircon U-Pb (SHRIMP)
	Unit:	upper Indicator Group
	Sample:	06RAT-6/z9125
	Session Mount:	IP420
	Geographic location:	Lac de la Chance, Otish Mountains
	Lithology:	Fine-grained quartzarenite
	Latitude:	52.39
	Longitude:	70.4603
	Labels	U	Th	Th	± Th	Pb*	204Pb	204Pb	± 204Pb		208*Pb	± 208Pb	207*Pb	±207Pb	206*Pb	±206Pb	Corr	207*Pb	±207Pb	206Pb	±206Pb	207Pb	±207Pb	207Pb	±207Pb	Disc.
		(ppm)	(ppm)	U	U	(ppm)	(ppb)	206Pb	206Pb	f(206)204	206*Pb	206Pb	235U	235U	238U	238U	Coeff	206*Pb	206Pb	238U	238U	206Pb	206Pb	206Pb	206Pb	(%)
	9125-1.1	185.79	173.34	0.96385	0.02103	119	2	2.668e-05	1.475e-05	0.00046	0.26638	0.00366	13.0106	0.20614	0.51162	0.00732	0.9443	0.18444	0.00097	2663.52	31.29	2680.42	15.05	2693.19	8.71	1.1	2700
	9125-2.1	179.67	203.48	1.16995	0.02631	121	1	1e-05	1e-05	0.00017	0.32706	0.00289	13.1291	0.18776	0.51547	0.00693	0.9701	0.18473	0.00065	2679.93	29.53	2688.97	13.58	2695.78	5.79	0.6	2700
	9125-3.1	121.35	50.89	0.43319	0.01005	71	2	2.902e-05	3.221e-05	0.0005	0.11819	0.00343	13.2035	0.23831	0.5213	0.00806	0.909	0.1837	0.00139	2704.69	34.24	2694.31	17.18	2686.53	12.59	-0.7	2700
	9125-4.1	142.06	140.37	1.02072	0.02144	94	0	5.38e-06	1.619e-05	9e-05	0.27719	0.00427	13.693	0.24944	0.52542	0.00776	0.8727	0.18901	0.00169	2722.13	32.89	2728.71	17.39	2733.58	14.83	0.4	2700
	9125-5.1	156.45	69.71	0.46032	0.00971	89	6	8.189e-05	2.08e-05	0.00142	0.11655	0.00195	12.9214	0.22491	0.50526	0.00776	0.9292	0.18548	0.0012	2636.37	33.33	2673.94	16.54	2702.47	10.75	2.4	2700
	9125-6.1	134.54	69.88	0.53652	0.01337	80	4	6.693e-05	2.44e-05	0.00116	0.14593	0.00209	13.2544	0.26475	0.5209	0.00842	0.8711	0.18455	0.00182	2702.98	35.79	2697.94	19.04	2694.16	16.43	-0.3	2700
	9125-7.1	55.91	56.6	1.0459	0.02341	36	1	5.268e-05	4.574e-05	0.00091	0.29286	0.00766	12.9931	0.26343	0.50206	0.00773	0.8293	0.1877	0.00214	2622.63	33.24	2679.15	19.3	2722.09	18.94	3.7	2700
	9125-8.1	69.5	31.93	0.4746	0.01045	40	2	6.337e-05	5.541e-05	0.0011	0.12512	0.00285	12.8458	0.21874	0.50765	0.00737	0.9057	0.18352	0.00134	2646.6	31.58	2668.41	16.17	2684.98	12.08	1.4	2700
	9125-9.1	97.44	46.39	0.49181	0.01092	56	4	8.302e-05	4.708e-05	0.00144	0.13532	0.00352	13.0684	0.25123	0.50743	0.00717	0.8086	0.18679	0.00213	2645.66	30.71	2684.61	18.3	2714.07	18.92	2.5	2700
	9125-10.1	129.32	96.26	0.76893	0.01634	81	1	1.996e-05	3.358e-05	0.00035	0.21038	0.00272	13.2761	0.24399	0.51985	0.00806	0.8991	0.18522	0.0015	2698.53	34.29	2699.49	17.5	2700.2	13.45	0.1	2700
	9125-11.1	170.61	124.89	0.75621	0.0166	106	1	1.393e-05	1.165e-05	0.00024	0.21146	0.00303	13.2025	0.25797	0.51732	0.00803	0.859	0.1851	0.00187	2687.78	34.21	2694.24	18.61	2699.08	16.75	0.4	2700
	9125-12.1	127.92	52.15	0.42116	0.02493	69	4	7.056e-05	2.079e-05	0.00122	0.07507	0.00595	12.6524	1.79493	0.49967	0.04183	0.6822	0.18365	0.0192	2612.37	182.37	2654.13	143.13	2686.11	184.16	2.7	2700
	9125-15.1	33.21	31.23	0.97175	0.0272	22	1	4.126e-05	0.00014275	0.00071	0.27453	0.00657	13.3692	0.32007	0.5231	0.00821	0.7401	0.18536	0.00301	2712.3	34.83	2706.08	22.87	2701.45	27.04	-0.4	2700
	9125-14.1	173.33	149.8	0.89285	0.01858	111	1	1.624e-05	2.327e-05	0.00028	0.25475	0.00425	13.2239	0.18975	0.51686	0.00691	0.9645	0.18556	0.00071	2685.86	29.42	2695.76	13.64	2703.19	6.32	0.6	2700
	9125-16.1	77.34	68.49	0.91483	0.02476	49	3	0.00010172	5.062e-05	0.00176	0.2491	0.00368	13.1416	0.22784	0.5131	0.00729	0.8792	0.18576	0.00155	2669.85	31.12	2689.87	16.49	2704.95	13.81	1.3	2700
	9125-18.1	187.5	129.2	0.71186	0.01577	113	4	5.341e-05	1.866e-05	0.00093	0.19103	0.0071	12.9036	0.19533	0.51124	0.00714	0.9588	0.18306	0.00079	2661.92	30.54	2672.64	14.37	2680.75	7.18	0.7	2700
	9125-19.1	149.47	77.46	0.53537	0.01274	88	1	8.65e-06	1.598e-05	0.00015	0.13977	0.00141	13.1908	0.19905	0.51731	0.007	0.9402	0.18494	0.00096	2687.75	29.83	2693.4	14.34	2697.64	8.58	0.4	2700
	9125-20.1	178.49	143.73	0.83184	0.01736	109	1	1.756e-05	1.815e-05	0.0003	0.23053	0.00335	12.8471	0.21199	0.50228	0.00735	0.9322	0.18551	0.00112	2623.6	31.61	2668.51	15.67	2702.72	9.97	2.9	2700
	9125-21.1	10.43	4.88	0.48342	0.02059	6	4	0.00078307	0.00051278	0.01357	0.11715	0.02027	12.6295	0.75067	0.50815	0.01147	0.4897	0.18026	0.00942	2648.72	49.22	2652.42	57.52	2655.24	89.33	0.2	2700
	9125-44.1	267.95	165.74	0.63902	0.01549	168	2	2.04e-05	1.46e-05	0.00035	0.17726	0.00138	14.2809	0.24344	0.53233	0.00788	0.918	0.19457	0.00133	2751.28	33.22	2768.55	16.31	2781.16	11.21	1.1	2700
	9125-47.1	100.21	79.73	0.82186	0.02108	61	2	3.686e-05	2.987e-05	0.00064	0.22652	0.00343	12.8064	0.21409	0.50214	0.0075	0.9372	0.18497	0.00109	2622.99	32.26	2665.52	15.87	2697.94	9.74	2.8	2700
	9125-48.1	184.09	76.75	0.43073	0.00906	105	4	5.493e-05	2.438e-05	0.00095	0.11779	0.00324	13.0577	0.43734	0.5088	0.01206	0.7858	0.18613	0.00389	2651.49	51.75	2683.83	32.09	2708.29	34.87	2.1	2700
	9125-46.1	46.34	19.34	0.43115	0.01102	27	2	7.686e-05	8.778e-05	0.00133	0.11453	0.0039	13.5718	0.28033	0.52125	0.00811	0.8246	0.18884	0.00222	2704.47	34.46	2720.3	19.72	2732.08	19.52	1	2700
	9125-49.1	115.66	56.03	0.50046	0.01182	67	0	9.23e-06	1.314e-05	0.00016	0.13784	0.00443	12.8203	0.36908	0.50662	0.01086	0.817	0.18353	0.00307	2642.16	46.62	2666.54	27.48	2685.07	27.94	1.6	2700
	9125-51.1	79.17	59.87	0.7812	0.01763	46	2	4.711e-05	3.355e-05	0.00082	0.21345	0.00411	11.591	0.25897	0.48933	0.00926	0.9017	0.1718	0.00167	2567.79	40.22	2571.95	21.1	2575.23	16.36	0.3	2700
	9125-50.1	158.72	160.47	1.04447	0.02282	101	2	2.944e-05	1.881e-05	0.00051	0.28747	0.00207	12.7502	0.2179	0.50134	0.00755	0.9281	0.18445	0.00118	2619.54	32.5	2661.37	16.22	2693.33	10.64	2.7	2700
	9125-52.1	189.46	151.23	0.82459	0.01758	117	3	4.171e-05	2.09e-05	0.00072	0.22227	0.00169	12.8979	0.20943	0.50823	0.00776	0.9705	0.18406	0.00073	2649.06	33.24	2672.22	15.42	2689.8	6.54	1.5	2700
	9125-55.1	20.72	16.56	0.82547	0.02427	12	2	0.0002027	8.423e-05	0.00351	0.22928	0.00615	12.681	0.32515	0.49209	0.00944	0.82	0.1869	0.00276	2579.73	40.9	2656.25	24.42	2715.05	24.6	5	2700
	9125-53.1	96.87	76.15	0.81207	0.01733	60	3	7.523e-05	2.29e-05	0.0013	0.21864	0.0023	13.0883	0.21088	0.51364	0.00753	0.9498	0.18481	0.00094	2672.16	32.17	2686.04	15.31	2696.5	8.41	0.9	2700
	9125-56.1	178.79	154.27	0.89136	0.01873	111	2	2.72e-05	2.155e-05	0.00047	0.24766	0.00234	12.9978	0.22438	0.50219	0.00793	0.9527	0.18771	0.00099	2623.22	34.11	2679.49	16.41	2722.23	8.74	3.6	2700
	9125-59.1	96.87	189.77	2.02377	0.04519	70	3	8.726e-05	4.549e-05	0.00151	0.56061	0.00412	11.4328	0.26162	0.48077	0.00763	0.7732	0.17247	0.00252	2530.62	33.29	2559.11	21.59	2581.76	24.63	2	2700
	9125-57.1	203.4	50.42	0.2561	0.00572	105	8	8.762e-05	3.712e-05	0.00152	0.03522	0.00155	12.5516	0.21709	0.49184	0.00784	0.958	0.18509	0.00093	2578.64	33.97	2646.6	16.4	2698.98	8.28	4.5	2700
	9125-58.1	328.57	362.2	1.13879	0.03919	220	1	9.86e-06	7.07e-06	0.00017	0.31449	0.01369	13.3303	1.17274	0.51711	0.02191	0.5839	0.18696	0.01346	2686.92	93.77	2703.33	86.69	2715.62	123.89	1.1	2700
	9125-61.1	43.2	38.54	0.92166	0.02271	28	2	9.074e-05	4.881e-05	0.00157	0.25118	0.00614	13.1119	0.25164	0.51817	0.00839	0.899	0.18352	0.00155	2691.42	35.73	2687.74	18.27	2684.97	14.08	-0.2	2700
	9125-63.1	168.88	63.97	0.39133	0.0085	96	2	3.208e-05	1.678e-05	0.00056	0.10742	0.00139	13.0779	0.22588	0.51292	0.00758	0.9079	0.18492	0.00135	2669.1	32.36	2685.29	16.42	2697.49	12.1	1.1	2700
	9125-64.1	282.39	142.26	0.52043	0.01084	163	1	1e-05	1e-05	0.00017	0.14396	0.00105	12.7	0.20527	0.50445	0.00726	0.9348	0.18259	0.00106	2632.91	31.17	2657.66	15.33	2676.55	9.6	1.6	2700
	9125-65.1	173.72	113.83	0.67691	0.02337	106	1	1.466e-05	1.306e-05	0.00025	0.18516	0.00171	13.0597	0.27193	0.51696	0.00794	0.811	0.18322	0.00225	2686.27	33.81	2683.98	19.83	2682.25	20.45	-0.1	2700
	9125-67.1	284.38	31.75	0.11533	0.0025	152	2	1.403e-05	1.52e-05	0.00024	0.03176	0.00111	12.9836	0.2129	0.51292	0.00778	0.9603	0.18359	0.00085	2669.1	33.24	2678.46	15.58	2685.54	7.64	0.6	2700
	9125-68.1	212.76	159.29	0.77344	0.01599	132	2	2.043e-05	1.362e-05	0.00035	0.21062	0.0034	13.1748	0.20452	0.51565	0.00758	0.975	0.18531	0.00064	2680.69	32.32	2692.25	14.76	2700.95	5.75	0.8	2700
	9125-71.1	166.92	91.34	0.56527	0.01189	99	1	7.54e-06	1.541e-05	0.00013	0.15626	0.00172	13.1931	0.23933	0.51017	0.00794	0.9103	0.18756	0.00142	2657.35	33.99	2693.56	17.27	2720.85	12.52	2.3	2700
	9125-69.1	214.9	105.33	0.50635	0.01095	126	1	6.83e-06	1.173e-05	0.00012	0.13966	0.00142	13.0996	0.22682	0.51611	0.00819	0.9539	0.18408	0.00096	2682.65	34.9	2686.85	16.47	2690.01	8.68	0.3	2700
	9125-70.1	170.91	117.35	0.70932	0.01506	106	5	6.587e-05	3.514e-05	0.00114	0.19152	0.00314	13.4877	0.21467	0.5215	0.00765	0.9581	0.18758	0.00086	2705.54	32.5	2714.42	15.16	2721.04	7.6	0.6	2700
	9125-72.1	124.21	119.56	0.99438	0.02111	91	1	2.463e-05	3.558e-05	0.00043	0.26701	0.00315	17.6181	0.30067	0.57095	0.00895	0.9553	0.2238	0.00114	2911.73	36.81	2969.12	16.53	3008.22	8.19	3.2	2700
	9125-23.1	309.14	555.58	1.85656	0.03815	229	2	1.133e-05	1.365e-05	0.0002	0.51046	0.00183	12.7286	0.18948	0.50678	0.00724	0.983	0.18216	0.0005	2642.86	31.06	2659.77	14.11	2672.66	4.56	1.1	2700
	9125-24.1	153.99	101.64	0.68186	0.01577	92	4	6.425e-05	2.14e-05	0.00111	0.18697	0.00406	12.9426	0.21492	0.50634	0.00732	0.9196	0.18539	0.00122	2640.97	31.38	2675.48	15.77	2701.68	10.9	2.2	2700
	9125-25.1	235.91	123.69	0.54167	0.01169	140	2	1.917e-05	1.562e-05	0.00033	0.1495	0.00132	13.2381	0.22592	0.51747	0.00774	0.9247	0.18554	0.00122	2688.46	32.98	2696.78	16.24	2703.01	10.85	0.5	2700
	9125-28.1	254.35	174.9	0.71037	0.02874	157	5	3.985e-05	9.66e-06	0.00069	0.19339	0.00329	13.212	0.59437	0.51986	0.02247	0.9837	0.18432	0.0015	2698.6	96.04	2694.91	43.38	2692.15	13.55	-0.2	2700
	9125-29.1	38.56	12.71	0.34038	0.00872	22	3	0.00018272	6.593e-05	0.00317	0.08945	0.00469	13.3384	0.26692	0.52384	0.00835	0.8606	0.18467	0.0019	2715.45	35.42	2703.91	19.08	2695.29	17.07	-0.7	2700
	9125-30.1	220.16	149.76	0.70269	0.01595	137	2	2.183e-05	1.065e-05	0.00038	0.195	0.0013	13.271	0.21385	0.52315	0.00773	0.9544	0.18398	0.00089	2712.53	32.79	2699.12	15.33	2689.1	8.04	-0.9	2700
	9125-31.1	76.21	59.76	0.81007	0.01781	48	1	3.256e-05	3.237e-05	0.00056	0.22557	0.00648	13.13	0.24894	0.51407	0.00763	0.8496	0.18524	0.00187	2674	32.58	2689.04	18.05	2700.37	16.74	1	2700
	9125-32.1	292.27	307.01	1.08515	0.03297	193	2	1.894e-05	1.07e-05	0.00033	0.30245	0.00213	13.046	0.31307	0.51512	0.00958	0.8429	0.18368	0.00239	2678.45	40.89	2682.98	22.89	2686.4	21.68	0.3	2700
	9125-33.1	79.74	118.67	1.53739	0.03292	57	1	3.728e-05	4.46e-05	0.00065	0.41776	0.00827	13.3798	0.29113	0.52054	0.00875	0.8405	0.18642	0.00222	2701.47	37.19	2706.84	20.77	2710.84	19.73	0.3	2700
	9125-35.1	154.49	89.57	0.59892	0.01298	86	2	2.525e-05	2.58e-05	0.00044	0.16293	0.00167	11.4587	0.1938	0.4818	0.00741	0.949	0.17249	0.00093	2535.12	32.31	2561.22	15.92	2581.96	9	1.8	2700
	9125-36.1	106.76	80.29	0.77693	0.0175	68	3	5.956e-05	4.567e-05	0.00103	0.20211	0.00243	13.6711	0.22988	0.52937	0.00799	0.9403	0.1873	0.00108	2738.8	33.76	2727.2	16.04	2718.62	9.54	-0.7	2700
	9125-37.1	281.1	132.03	0.48522	0.01052	163	2	1.817e-05	2.806e-05	0.00031	0.1313	0.00203	12.9438	0.20411	0.51093	0.00729	0.9461	0.18374	0.00095	2660.61	31.19	2675.57	14.97	2686.89	8.54	1	2700
	9125-39.1	166.47	119.87	0.74384	0.01601	101	4	5.023e-05	1.68e-05	0.00087	0.19641	0.0018	12.99	0.22664	0.50756	0.00809	0.9518	0.18562	0.001	2646.18	34.67	2678.93	16.58	2703.74	8.93	2.1	2700
	9125-38.1	93.33	53.48	0.59204	0.0141	55	2	5.407e-05	2.727e-05	0.00094	0.16214	0.00216	13.0602	0.2306	0.50988	0.00769	0.9071	0.18577	0.00139	2656.1	32.91	2684.01	16.79	2705.11	12.42	1.8	2700
	9125-40.1	118.42	55.08	0.48055	0.01082	68	6	0.00012271	3.11e-05	0.00213	0.12763	0.00241	12.8797	0.24916	0.50739	0.00832	0.902	0.1841	0.00155	2645.47	35.68	2670.89	18.39	2690.2	13.98	1.7	2700
	9125-41.1	284.53	66.84	0.24268	0.00532	147	38	0.00032025	4.522e-05	0.00555	0.05268	0.0018	12.3221	0.2148	0.48573	0.00782	0.959	0.18399	0.00092	2552.16	34.01	2629.26	16.51	2689.16	8.26	5.1	2700
	9125-43.1	195.93	310.32	1.63617	0.04142	123	14	0.00017533	2.826e-05	0.00304	0.32933	0.0027	12.1581	0.59501	0.4832	0.0232	0.9944	0.18249	0.00095	2541.21	101.63	2616.68	46.99	2675.62	8.66	5	2700
	9125-42.1	125.58	146.44	1.20473	0.02579	83	2	3.1e-05	3.894e-05	0.00054	0.33393	0.00295	12.807	0.2596	0.50712	0.00821	0.8624	0.18316	0.00189	2644.34	35.21	2665.56	19.27	2681.7	17.21	1.4	2700
																											2700
	Unit:	Peribonca Group
	Sample:	06RAT-1/z9126
	Session Mount:	IP420
	Geographic location:	SOQUEM Camp, north of Indicator Lake
	Lithology:	Medium-grained, eolian quartzarenite from ~1.5 m of SOQUEM drill core #2000-4
	Latitude:	52.0458
	Longitude:	71.7097
	Labels	U	Th	Th	± Th	Pb*	204Pb	204Pb	± 204Pb		208*Pb	± 208Pb	207*Pb	±207Pb	206*Pb	±206Pb	Corr	207*Pb	±207Pb	206Pb	±206Pb	207Pb	±207Pb	207Pb	±207Pb	Disc.
		(ppm)	(ppm)	U	U	(ppm)	(ppb)	206Pb	206Pb	f(206)204	206*Pb	206Pb	235U	235U	238U	238U	Coeff	206*Pb	206Pb	238U	238U	206Pb	206Pb	206Pb	206Pb	(%)
	9126-1.1	76.82	57.89	0.77851	0.01692	47	1	3.037e-05	2.594e-05	0.00053	0.2114	0.00546	13.0534	0.21706	0.51075	0.0076	0.9382	0.18536	0.00108	2659.81	32.5	2683.52	15.81	2701.42	9.61	1.5	t1
	9126-4.1	51.49	23.11	0.4637	0.01438	31	0	1.992e-05	3.353e-05	0.00035	0.12633	0.00237	13.9421	0.28683	0.52545	0.00902	0.8913	0.19244	0.00181	2722.23	38.22	2745.78	19.68	2763.15	15.52	1.5	2700
	9126-5.1	158.97	74.3	0.4828	0.01083	92	1	1e-05	1e-05	0.00017	0.13347	0.00215	13.0051	0.33067	0.50848	0.00999	0.8408	0.1855	0.00257	2650.16	42.83	2680.03	24.26	2702.64	23.08	1.9	2700
	9126-6.1	84.94	65.04	0.79101	0.01822	52	0	1e-05	1e-05	0.00017	0.21392	0.0037	12.8682	0.23328	0.50532	0.0075	0.8786	0.18469	0.00161	2636.61	32.19	2670.05	17.23	2695.48	14.49	2.2	2700
	9126-7.1	106.97	71.91	0.69452	0.01643	63	0	1.046e-05	2.275e-05	0.00018	0.18277	0.00224	12.9857	0.21355	0.50324	0.00755	0.951	0.18715	0.00096	2627.69	32.45	2678.62	15.62	2717.29	8.47	3.3	2700
	9126-8.1	109.23	74.8	0.70743	0.01855	64	1	2.176e-05	2.249e-05	0.00038	0.19506	0.00205	12.4901	0.23113	0.4932	0.00747	0.8787	0.18367	0.00164	2584.52	32.33	2641.98	17.55	2686.28	14.8	3.8	2700
	9126-9.1	193.91	60.33	0.32143	0.00697	108	1	6.22e-06	1.529e-05	0.00011	0.08859	0.00119	12.8056	0.22326	0.5067	0.00792	0.9392	0.18329	0.00111	2642.51	33.96	2665.46	16.55	2682.91	10.01	1.5	2700
	9126-10.1	149.91	116.42	0.80224	0.01839	91	2	2.341e-05	2.478e-05	0.00041	0.21978	0.00195	12.867	0.2178	0.50405	0.00786	0.9574	0.18514	0.00091	2631.19	33.77	2669.96	16.07	2699.46	8.16	2.5	2700
	9126-11.1	32.23	19.73	0.63248	0.01506	20	2	0.00013923	0.00010296	0.00241	0.16402	0.00519	14.645	0.39395	0.51941	0.01061	0.8297	0.20449	0.00309	2696.66	45.18	2792.46	25.9	2862.4	24.83	5.8	2700
	9126-12.1	45.4	38.34	0.87256	0.02571	27	2	9.847e-05	5.633e-05	0.00171	0.22422	0.00802	12.5715	0.29858	0.49249	0.00916	0.8498	0.18513	0.00234	2581.45	39.7	2648.09	22.59	2699.4	20.98	4.4	2700
	9126-13.1	296.42	94.49	0.32929	0.00689	165	1	6.57e-06	6.87e-06	0.00011	0.09032	0.00072	12.9195	0.19482	0.50782	0.00733	0.9817	0.18452	0.00053	2647.31	31.43	2673.8	14.31	2693.89	4.79	1.7	2700
	9126-14.1	69.85	26.64	0.39404	0.00888	39	0	1e-05	1e-05	0.00017	0.10505	0.00197	12.736	0.26286	0.50323	0.00844	0.8742	0.18355	0.00185	2627.67	36.31	2660.32	19.62	2685.24	16.8	2.1	2700
	9126-15.1	87.62	60.04	0.70785	0.01604	52	1	3.223e-05	2.629e-05	0.00056	0.19323	0.00342	12.6614	0.22626	0.50252	0.00768	0.9079	0.18274	0.00138	2624.61	33.03	2654.79	16.96	2677.88	12.54	2	2700
	9126-16.1	73.06	34.08	0.48193	0.0125	42	1	1.966e-05	4.706e-05	0.00034	0.12937	0.00361	12.8931	0.23819	0.50484	0.00834	0.938	0.18523	0.0012	2634.55	35.83	2671.87	17.56	2700.24	10.7	2.4	2700
	9126-18.1	58.95	46.39	0.81308	0.0193	36	1	5.449e-05	4.867e-05	0.00094	0.22709	0.00429	12.9441	0.23925	0.50769	0.00802	0.9077	0.18491	0.00145	2646.78	34.39	2675.59	17.57	2697.44	12.97	1.9	2700
	9126-19.1	164.61	90.26	0.56645	0.01198	97	1	9.43e-06	9.6e-06	0.00016	0.15685	0.00125	12.9585	0.20425	0.508	0.00761	0.9772	0.18501	0.00062	2648.1	32.61	2676.64	14.97	2698.27	5.58	1.9	2700
	9126-20.1	160.38	80.45	0.51819	0.01151	102	1	1.728e-05	1.473e-05	0.0003	0.14184	0.00163	15.4196	0.31079	0.54692	0.00883	0.8646	0.20448	0.00209	2812.37	36.91	2841.52	19.4	2862.27	16.71	1.7	2700
	9126-21.1	139.95	8.56	0.06318	0.00239	73	1	1e-05	1e-05	0.00017	0.0174	0.00058	12.7876	0.22121	0.50799	0.00776	0.9292	0.18257	0.00118	2648.02	33.24	2664.13	16.42	2676.38	10.7	1.1	2700
	9126-23.1	116.16	75.26	0.66926	0.014	69	0	6.25e-06	3.149e-05	0.00011	0.18568	0.002	12.7286	0.21325	0.5016	0.00758	0.9433	0.18405	0.00103	2620.65	32.6	2659.77	15.9	2689.66	9.29	2.6	2700
	9126-24.1	40.06	24.64	0.63553	0.01578	23	1	4.956e-05	8.837e-05	0.00086	0.17438	0.00474	12.375	0.26126	0.49004	0.00783	0.8273	0.18315	0.00219	2570.84	33.95	2633.28	20.03	2681.63	19.91	4.1	2700
	9126-26.1	89.21	78.24	0.90594	0.01986	56	2	6.247e-05	3.068e-05	0.00108	0.24695	0.00273	12.9846	0.24316	0.50821	0.00799	0.8955	0.18531	0.00156	2648.96	34.24	2678.54	17.81	2700.94	13.94	1.9	2700
	9126-28.1	148.83	34.71	0.24091	0.00525	81	1	1.25e-05	1.596e-05	0.00022	0.07356	0.00115	12.6331	0.2249	0.50029	0.00801	0.9417	0.18314	0.00111	2615.03	34.51	2652.69	16.89	2681.53	10.02	2.5	2700
	9126-31.1	41.93	46.74	1.15165	0.02829	28	2	8.636e-05	0.00015253	0.0015	0.30592	0.01009	13.0084	0.37994	0.51302	0.0098	0.7387	0.1839	0.00365	2669.53	41.88	2680.27	27.92	2688.38	33.18	0.7	2700
	9126-32.1	417.66	237.15	0.58658	0.01229	243	2	1.007e-05	6.47e-06	0.00017	0.16306	0.00232	12.9189	0.21618	0.50116	0.00762	0.9488	0.18696	0.001	2618.78	32.82	2673.76	15.89	2715.6	8.81	3.6	2700
	9126-35.1	85.73	89.02	1.07266	0.11874	57	1	3.227e-05	2.364e-05	0.00056	0.29017	0.01965	13.2634	1.489	0.52115	0.04022	0.7681	0.18458	0.01337	2704.04	172.74	2698.58	111.95	2694.5	124.98	-0.4	2700
	9126-37.1	157.53	82.51	0.5411	0.01193	93	0	6.82e-06	1.102e-05	0.00012	0.15273	0.00212	13.0152	0.27586	0.51137	0.00737	0.7618	0.18459	0.00255	2662.48	31.52	2680.76	20.19	2694.57	23.04	1.2	2700
	9126-38.1	134.34	95.83	0.73696	0.01767	81	1	1.789e-05	2.547e-05	0.00031	0.20744	0.00775	12.9219	0.68898	0.50133	0.01838	0.7682	0.18694	0.00643	2619.49	79.4	2673.97	51.54	2715.44	57.88	3.5	2700
	9126-40.1	103.66	65.31	0.65085	0.01383	61	2	3.96e-05	2.41e-05	0.00069	0.17566	0.00303	12.8352	0.24845	0.50541	0.00819	0.8935	0.18419	0.00161	2637.02	35.16	2667.63	18.4	2690.92	14.55	2	2700
	9126-41.1	97.27	69.05	0.73332	0.01577	59	5	0.00011	3.181e-05	0.00191	0.20632	0.00267	12.8586	0.27851	0.50721	0.00824	0.8221	0.18387	0.00229	2644.71	35.35	2669.35	20.61	2688.07	20.69	1.6	2700
	9126-42.1	131.72	84.73	0.66452	0.01479	79	1	1.429e-05	1.387e-05	0.00025	0.18066	0.00185	13.0909	0.29491	0.51234	0.00826	0.7927	0.18531	0.00257	2666.62	35.32	2686.23	21.48	2701.01	23.04	1.3	2700
	9126-43.1	160.28	137.71	0.8876	0.01853	99	2	3.043e-05	2.767e-05	0.00053	0.24542	0.00286	12.8979	0.24105	0.49949	0.00818	0.924	0.18728	0.00135	2611.62	35.25	2672.22	17.77	2718.4	11.92	3.9	2700
	9126-46.1	180.7	214.04	1.22363	0.02613	120	3	3.469e-05	2.979e-05	0.0006	0.34423	0.00224	12.8411	0.20546	0.50375	0.00729	0.9454	0.18488	0.00097	2629.88	31.32	2668.06	15.19	2697.13	8.7	2.5	2700
	9126-44.1	82.69	68.59	0.85698	0.01817	52	0	7.23e-06	2.189e-05	0.00013	0.23509	0.00283	13.1547	0.24349	0.51064	0.00828	0.9241	0.18684	0.00133	2659.38	35.43	2690.81	17.62	2714.51	11.8	2	2700
	9126-47.1	161.83	57.74	0.36858	0.0087	89	1	1.082e-05	1.333e-05	0.00019	0.09977	0.00117	12.5797	0.22102	0.49644	0.00744	0.906	0.18378	0.00138	2598.46	32.12	2648.7	16.66	2687.31	12.45	3.3	2700
	9126-50.1	214.9	230.02	1.10574	0.02369	113	5	6.255e-05	1.773e-05	0.00108	0.12331	0.00135	11.8656	0.18515	0.46886	0.00683	0.9658	0.18355	0.00075	2478.55	30.03	2593.85	14.72	2685.19	6.76	7.7	2700
	9126-49.1	117.64	199.96	1.75592	0.03671	79	13	0.00025918	3.613e-05	0.00449	0.40559	0.00319	12.5214	0.20576	0.49151	0.00729	0.9444	0.18477	0.00101	2577.19	31.6	2644.33	15.57	2696.12	9.03	4.4	2700
	9126-51.1	142.91	169.32	1.22401	0.02565	93	2	3.465e-05	2.68e-05	0.0006	0.33062	0.00365	12.7791	0.25172	0.49981	0.00822	0.8922	0.18543	0.00166	2613	35.44	2663.5	18.72	2702.08	14.88	3.3	2700
	9126-54.1	183.16	258.19	1.45625	0.02986	125	1	1.162e-05	2.68e-05	0.0002	0.39753	0.00352	12.7556	0.21186	0.50166	0.00747	0.9397	0.18441	0.00106	2620.92	32.15	2661.77	15.76	2692.96	9.49	2.7	2700
	9126-52.1	111.29	123.08	1.14251	0.02415	73	0	1e-05	1e-05	0.00017	0.3179	0.00226	13.1565	0.20743	0.50788	0.00746	0.9644	0.18788	0.00079	2647.56	31.95	2690.94	14.99	2723.7	6.94	2.8	2700
	9126-55.1	408.8	47.9	0.12105	0.00261	212	4	2.087e-05	7.81e-06	0.00036	0.0335	0.00048	12.4316	0.19413	0.49725	0.00719	0.9613	0.18132	0.00079	2601.96	31.05	2637.57	14.78	2665.01	7.2	2.4	2700
	9126-58.1	205.72	176.92	0.88846	0.019	129	3	3.254e-05	1.416e-05	0.00056	0.24163	0.00707	13.0585	0.2347	0.50961	0.00793	0.9162	0.18585	0.00135	2654.95	33.95	2683.89	17.09	2705.76	12.03	1.9	2700
	9126-56.1	81.18	66.59	0.84747	0.01816	50	2	5.641e-05	3.786e-05	0.00098	0.22985	0.00261	12.9157	0.25781	0.50777	0.00759	0.821	0.18448	0.00212	2647.12	32.54	2673.52	18.99	2693.55	19.1	1.7	2700
	9126-57.1	113.37	63.03	0.57434	0.01287	67	3	6.598e-05	2.304e-05	0.00114	0.15706	0.00176	12.9733	0.21373	0.51168	0.00776	0.9573	0.18389	0.00088	2663.79	33.19	2677.72	15.65	2688.24	7.96	0.9	2700
	9126-59.1	85.36	60.9	0.7371	0.01899	53	0	1e-05	1e-05	0.00017	0.20041	0.00243	13.1063	0.26094	0.52115	0.00875	0.8986	0.1824	0.00161	2704.07	37.19	2687.34	18.96	2674.77	14.65	-1.1	2700
	9126-62.1	64.71	27.27	0.43528	0.0116	41	2	8.027e-05	4.977e-05	0.00139	0.11555	0.00318	15.8295	0.29606	0.55452	0.00842	0.8734	0.20704	0.0019	2843.93	35.02	2866.56	18.02	2882.51	14.99	1.3	2700
	9126-61.1	53.78	92.14	1.77003	0.03987	41	2	6.407e-05	3.432e-05	0.00111	0.4737	0.01038	14.1066	0.2956	0.53324	0.00905	0.8714	0.19187	0.00199	2755.1	38.15	2756.9	20.07	2758.22	17.11	0.1	2700
	9126-66.1	141.44	69.27	0.50594	0.01175	83	1	1.442e-05	1.559e-05	0.00025	0.13857	0.00163	13.1299	0.24344	0.51251	0.00844	0.9332	0.1858	0.00125	2667.35	36.06	2689.03	17.65	2705.37	11.12	1.4	2700
	9126-67.1	31.86	19.81	0.64235	0.01965	19	1	9.507e-05	9.832e-05	0.00165	0.17355	0.00599	12.8513	0.38077	0.50385	0.01	0.7526	0.18499	0.00364	2630.34	42.99	2668.81	28.3	2698.1	32.85	2.5	2700
	9126-70.1	225.66	187.96	0.86046	0.02515	140	3	2.609e-05	1.087e-05	0.00045	0.23051	0.00162	12.9327	0.20883	0.50752	0.00756	0.9582	0.18481	0.00086	2646.04	32.4	2674.76	15.33	2696.54	7.71	1.9	2700
	9126-71.1	184.66	113.68	0.63596	0.01326	110	2	2.884e-05	1.853e-05	0.0005	0.17718	0.00164	12.9655	0.21717	0.5105	0.0076	0.9336	0.1842	0.00111	2658.77	32.51	2677.15	15.91	2691.06	10.03	1.2	2700
	9126-73.1	33.68	31.59	0.96882	0.02364	22	1	5.722e-05	9.891e-05	0.00099	0.26795	0.0052	13.0662	0.33812	0.51333	0.00819	0.7055	0.18461	0.00341	2670.83	34.97	2684.45	24.71	2694.72	30.86	0.9	2700
	9126-75.1	204.84	146.21	0.73736	0.0156	124	2	2.445e-05	1.048e-05	0.00042	0.20229	0.00176	12.8942	0.22353	0.50518	0.0078	0.935	0.18512	0.00115	2636.02	33.48	2671.95	16.47	2699.26	10.27	2.3	2700
	9126-86.1	80.12	43.32	0.5586	0.01419	51	4	0.0001044	6.577e-05	0.00181	0.15205	0.00361	15.0927	0.2835	0.54524	0.00819	0.8632	0.20076	0.00192	2805.36	34.26	2821.1	18.05	2832.37	15.68	1	2700
	9126-84.1	195.25	235.13	1.24409	0.05241	131	1	1.542e-05	1.854e-05	0.00027	0.3432	0.0061	13.1349	0.31365	0.50977	0.00735	0.6944	0.18688	0.00324	2655.63	31.46	2689.39	22.79	2714.86	28.84	2.2	2700
	9126-87.1	97.65	74.3	0.78608	0.01676	55	8	0.00018849	5.6e-05	0.00327	0.15496	0.00307	12.2982	0.26089	0.48556	0.0082	0.8607	0.18369	0.002	2551.44	35.7	2627.44	20.12	2686.51	18.11	5	2700
	9126-78.1	115.81	61.44	0.54806	0.01238	67	2	3.631e-05	3.201e-05	0.00063	0.15001	0.00327	12.8064	0.2523	0.49944	0.00858	0.9208	0.18597	0.00144	2611.37	36.98	2665.52	18.73	2706.87	12.84	3.5	2700
	9126-79.1	117.56	42.42	0.37276	0.00846	65	1	2.822e-05	3.414e-05	0.00049	0.09987	0.00181	12.7476	0.22162	0.50107	0.00739	0.9022	0.18451	0.00139	2618.4	31.8	2661.18	16.5	2693.86	12.54	2.8	2700
	9126-77.1	189.09	111.59	0.60964	0.01342	113	4	4.603e-05	1.63e-05	0.0008	0.16858	0.00164	13.0141	0.20168	0.51103	0.00742	0.9683	0.1847	0.00072	2661	31.73	2680.67	14.72	2695.54	6.46	1.3	2700
	9126-81.1	262.02	138.75	0.54704	0.01163	152	4	3.531e-05	1.229e-05	0.00061	0.15123	0.00115	12.8022	0.20365	0.50467	0.00766	0.9795	0.18398	0.00059	2633.84	32.9	2665.21	15.09	2689.1	5.34	2.1	2700
	9126-83.1	171.91	129.33	0.77721	0.01612	105	2	2.418e-05	1.547e-05	0.00042	0.20106	0.00237	12.9686	0.20935	0.50966	0.0074	0.9418	0.18455	0.00101	2655.19	31.68	2677.37	15.33	2694.17	9.06	1.4	2700
																											2700
	Unit:	Papaswasati Formation
	Sample:	06RAT-14/z9124
	Session Mount:	IP421
	Geographic location:	Cheno River, north of Lac Albanel
	Lithology:	Arkosic pebbly granulestone
	Latitude:	51.4558
	Longitude:	72.7258
	Labels	U	Th	Th	± Th	Pb*	204Pb	204Pb	± 204Pb		208*Pb	± 208Pb	207*Pb	±207Pb	206*Pb	±206Pb	Corr	207*Pb	±207Pb	206Pb	±206Pb	207Pb	±207Pb	207Pb	±207Pb	Disc.
		(ppm)	(ppm)	U	U	(ppm)	(ppb)	206Pb	206Pb	f(206)204	206*Pb	206Pb	235U	235U	238U	238U	Coeff	206*Pb	206Pb	238U	238U	206Pb	206Pb	206Pb	206Pb	(%)
	9124-1.1	280.82	243.41	0.89542	0.02038	177	3	2.067e-05	8.65e-06	0.00036	0.24579	0.03203	13.127	2.1176	0.51013	0.04094	0.5984	0.18664	0.02431	2657.2	177.17	2688.8	164.89	2712.7	232.72	2	t1
	9124-3.1	190.9	134.83	0.72962	0.01569	134	4	4.362e-05	1.39e-05	0.00076	0.20001	0.00156	16.937	0.27601	0.57792	0.00872	0.9609	0.21255	0.00097	2940.3	35.73	2931.3	15.75	2925.1	7.38	-0.5	2700
	9124-4.1	37.69	18.3	0.50168	0.01333	24	1	4.545e-05	0.0001197	0.00079	0.13068	0.00608	14.987	0.35923	0.55557	0.00926	0.775	0.19565	0.00299	2848.3	38.49	2814.4	23.08	2790.2	25.22	-2.1	2700
	9124-5.1	194.71	258.41	1.371	0.18953	98	14	0.00019608	4.948e-05	0.0034	0.19772	0.00258	10.803	0.32102	0.42084	0.01191	0.9783	0.18617	0.00115	2264.3	54.26	2506.3	28	2708.6	10.27	16.4	2700
	9124-6.1	42.08	44.76	1.0989	0.02448	28	1	4.597e-05	5.004e-05	0.0008	0.30011	0.00475	13.241	0.27243	0.52015	0.00863	0.8689	0.18462	0.0019	2699.8	36.7	2697	19.61	2694.9	17.06	-0.2	2700
	9124-8.1	91.32	130.14	1.4721	0.03243	62	1	3.129e-05	2.192e-05	0.00054	0.40093	0.00553	12.6	0.20196	0.49942	0.00731	0.9514	0.18298	0.00091	2611.3	31.49	2650.2	15.19	2680.1	8.25	2.6	2700
	9124-9.1	47.87	62	1.3379	0.02925	33	0	1e-05	1e-05	0.00017	0.36369	0.00367	13.154	0.23455	0.52482	0.00833	0.9349	0.18179	0.00116	2719.6	35.32	2690.8	16.97	2669.2	10.6	-1.9	2700
	9124-10.1	122.36	138.18	1.1666	0.02435	81	1	2.639e-05	2.842e-05	0.00046	0.32209	0.00278	12.889	0.21586	0.50953	0.00773	0.9465	0.18346	0.001	2654.6	33.09	2671.6	15.9	2684.4	9.04	1.1	2700
	9124-11.1	208.27	145.94	0.7239	0.01493	124	3	3.728e-05	1.595e-05	0.00065	0.19436	0.00163	12.716	0.19616	0.50048	0.00718	0.9636	0.18427	0.00077	2615.9	30.92	2658.8	14.63	2691.7	6.89	2.8	2700
	9124-12.1	39.4	22.05	0.57801	0.01357	25	2	0.0001108	6.293e-05	0.00192	0.15841	0.00412	14.896	0.34348	0.53995	0.00972	0.8478	0.20009	0.00247	2783.2	40.84	2808.6	22.18	2826.9	20.26	1.5	2700
	9124-13.1	41.1	31.41	0.78937	0.01905	27	1	3.142e-05	5.501e-05	0.00054	0.21221	0.00364	15.492	0.29237	0.54705	0.00861	0.8912	0.20538	0.00177	2812.9	35.98	2846	18.16	2869.5	14.1	2	2700
	9124-15.1	212.93	85.69	0.41572	0.00867	121	0	2.33e-06	9.38e-06	4e-05	0.11517	0.00108	12.848	0.22565	0.51043	0.00834	0.9636	0.18256	0.00086	2658.5	35.68	2668.6	16.68	2676.3	7.85	0.7	2700
	9124-14.1	161.1	163.85	1.0507	0.02589	81	6	9.789e-05	3.872e-05	0.0017	0.18735	0.00215	10.753	0.17417	0.42381	0.00619	0.943	0.18401	0.001	2277.7	28.07	2502	15.16	2689.4	9.01	15.3	2700
	9124-17.1	46.31	32.39	0.72247	0.01667	28	0	1e-05	1e-05	0.00017	0.20677	0.00292	12.968	0.24222	0.51185	0.00831	0.9188	0.18376	0.00137	2664.5	35.52	2677.4	17.76	2687.1	12.34	0.8	2700
	9124-18.1	336.11	77.44	0.238	0.00505	185	1	3.75e-06	7.42e-06	6e-05	0.06082	0.00064	13.079	0.20897	0.5124	0.00763	0.9651	0.18512	0.00078	2666.9	32.61	2685.4	15.18	2699.3	6.98	1.2	2700
	9124-19.1	146.56	106.51	0.75076	0.01599	90	2	2.769e-05	1.537e-05	0.00048	0.20769	0.00202	13.117	0.20616	0.51395	0.00748	0.9605	0.1851	0.00082	2673.5	31.91	2688.1	14.94	2699.1	7.3	0.9	2700
	9124-20.1	119.69	153.62	1.3259	0.02958	83	1	2.526e-05	1.75e-05	0.00044	0.3689	0.00375	13.243	0.21707	0.51606	0.00757	0.9385	0.18611	0.00106	2682.5	32.27	2697.1	15.59	2708.1	9.44	0.9	2700
	9124-21.1	94.46	76.75	0.83936	0.0188	59	1	1.565e-05	2.233e-05	0.00027	0.22992	0.00269	13.146	0.26737	0.51541	0.00846	0.8691	0.18499	0.00188	2679.7	36.08	2690.2	19.38	2698.1	16.84	0.7	2700
	9124-22.1	78.6	60.52	0.79542	0.01835	49	1	1.72e-05	2.617e-05	0.0003	0.22111	0.00295	12.985	0.25315	0.50985	0.00831	0.8929	0.18472	0.00163	2656	35.58	2678.6	18.55	2695.7	14.69	1.5	2700
	9124-23.1	44.28	26.17	0.61066	0.01924	28	0	1e-05	1e-05	0.00017	0.16434	0.0025	15.307	0.31222	0.54638	0.00844	0.8282	0.20319	0.00234	2810.1	35.3	2834.6	19.63	2852	18.88	1.5	2700
	9124-24.1	183.82	76.87	0.43204	0.00916	106	3	3.522e-05	2.632e-05	0.00061	0.11739	0.00148	13.149	0.21806	0.51691	0.00772	0.9427	0.1845	0.00103	2686.1	32.89	2690.4	15.77	2693.7	9.24	0.3	2700
	9124-25.1	116.97	74.25	0.65574	0.01397	71	2	4.461e-05	2.312e-05	0.00077	0.17887	0.00293	13.158	0.21268	0.51748	0.00772	0.9585	0.18441	0.00086	2688.5	32.87	2691	15.37	2692.9	7.69	0.2	2700
	9124-26.1	106.92	91.87	0.88764	0.01897	67	1	2.298e-05	2.991e-05	0.0004	0.24611	0.00229	12.984	0.2118	0.50969	0.0076	0.9527	0.18476	0.00092	2655.3	32.54	2678.5	15.5	2696	8.28	1.5	2700
	9124-27.1	79.59	34.54	0.44832	0.00983	49	0	2.39e-06	3.83e-05	4e-05	0.11377	0.00269	15.635	0.26462	0.54127	0.00831	0.9478	0.2095	0.00114	2788.7	34.87	2854.8	16.28	2901.7	8.85	3.9	2700
	9124-28.1	63.57	70.6	1.1473	0.02468	42	0	3.62e-06	4.278e-05	6e-05	0.30727	0.00343	13.312	0.24762	0.51561	0.00792	0.8848	0.18725	0.00164	2680.6	33.79	2702	17.72	2718.1	14.48	1.4	2700
	9124-29.1	169.5	86.24	0.52564	0.01097	101	2	2.165e-05	2.354e-05	0.00038	0.14384	0.00239	13.184	0.23709	0.52117	0.00847	0.9451	0.18347	0.00109	2704.1	36	2692.9	17.12	2684.5	9.83	-0.7	2700
	9124-30.1	95.73	25.41	0.27422	0.00619	54	1	1.581e-05	3.004e-05	0.00027	0.07426	0.00281	13.196	0.27961	0.51653	0.00888	0.8727	0.18529	0.00193	2684.5	37.85	2693.8	20.2	2700.8	17.32	0.6	2700
	9124-31.1	159.48	110.77	0.71754	0.01533	94	1	7.76e-06	3.15e-05	0.00013	0.19849	0.0025	12.633	0.27423	0.49432	0.0092	0.91	0.18535	0.00168	2589.3	39.83	2652.7	20.63	2701.4	15.05	4.1	2700
	9124-32.1	48.3	11.96	0.25583	0.00676	28	0	3.61e-06	3.656e-05	6e-05	0.07129	0.00239	15.147	0.39313	0.53372	0.01186	0.9089	0.20583	0.00225	2757.1	50.06	2824.5	25.03	2873	17.84	4	2700
	9124-33.1	73.52	45.27	0.63614	0.01464	44	2	6.203e-05	3.439e-05	0.00107	0.17564	0.00444	13.028	0.29326	0.5065	0.00874	0.8359	0.18656	0.00232	2641.7	37.51	2681.7	21.45	2712.1	20.69	2.6	2700
	9124-34.1	197.1	239.64	1.256	0.02653	129	44	0.00051168	5.409e-05	0.00887	0.30622	0.00415	12.809	0.24768	0.50987	0.0077	0.8474	0.1822	0.00189	2656.1	32.94	2665.7	18.38	2673	17.23	0.6	2700
	9124-35.1	184.99	90.47	0.5052	0.01079	102	2	2.594e-05	2.368e-05	0.00045	0.14052	0.0017	11.619	0.19233	0.48982	0.00727	0.9401	0.17204	0.00098	2569.9	31.55	2574.2	15.59	2577.6	9.53	0.3	2700
	9124-36.1	95.92	103.2	1.1115	0.02357	63	0	1e-05	1e-05	0.00017	0.29721	0.00296	13.156	0.27271	0.51251	0.00869	0.8783	0.18618	0.00186	2667.3	37.15	2690.9	19.75	2708.7	16.57	1.5	2700
	9124-38.1	27.52	18.4	0.69093	0.01814	16	2	0.0002027	0.00010479	0.00351	0.18292	0.00603	12.816	0.34553	0.50551	0.00986	0.7989	0.18387	0.00301	2637.4	42.34	2666.2	25.72	2688.1	27.27	1.9	2700
	9124-39.1	124.15	112	0.93195	0.02242	76	5	8.651e-05	3.274e-05	0.0015	0.25149	0.00331	12.436	0.21409	0.49233	0.00738	0.9205	0.18319	0.00124	2580.7	31.98	2637.9	16.31	2682	11.26	3.8	2700
	9124-40.1	32.67	15.3	0.48375	0.01666	20	2	0.000131	7.787e-05	0.00227	0.12839	0.00695	15.673	1.0343	0.54455	0.02448	0.7627	0.20874	0.00898	2802.5	102.99	2857.1	65.03	2895.8	71.55	3.2	2700
	9124-42.1	265.88	184.29	0.71605	0.01953	160	1	8.05e-06	9.38e-06	0.00014	0.19923	0.00145	12.865	0.1954	0.50475	0.00728	0.9768	0.18486	0.00061	2634.2	31.27	2669.8	14.41	2697	5.42	2.3	2700
	9124-41.1	264.79	268.69	1.0483	0.07485	174	5	3.953e-05	2.371e-05	0.00069	0.28313	0.0321	13.009	2.7216	0.5212	0.08263	0.8284	0.18103	0.02138	2704.3	360.03	2680.3	219.33	2662.3	210.39	-1.6	2700
	9124-43.1	111.38	94.59	0.87728	0.01942	69	3	5.81e-05	4.535e-05	0.00101	0.23858	0.00299	12.91	0.24895	0.50902	0.00798	0.8746	0.18394	0.00173	2652.4	34.2	2673.1	18.34	2688.8	15.66	1.4	2700
	9124-44.1	13.31	6.53	0.50677	0.02189	8	1	0.00014757	0.00014655	0.00256	0.12915	0.00865	15.139	0.59032	0.5413	0.01469	0.7756	0.20284	0.00503	2788.9	61.74	2824	37.84	2849.2	40.99	2.1	2700
	9124-46.1	109.35	64.22	0.60672	0.01534	65	0	1e-05	1e-05	0.00017	0.16349	0.0022	12.955	0.22972	0.51226	0.00806	0.933	0.18342	0.00118	2666.3	34.46	2676.4	16.85	2684	10.68	0.7	2700
	9124-45.1	262.4	142.49	0.561	0.01159	157	2	1.71e-05	1.116e-05	0.0003	0.15681	0.00217	13.195	0.21804	0.51659	0.00772	0.9453	0.18525	0.00101	2684.7	32.89	2693.7	15.72	2700.4	9	0.6	2700
	9124-47.1	309.49	95.19	0.31776	0.00661	171	3	2.212e-05	1.045e-05	0.00038	0.08625	0.0012	12.931	0.21083	0.50407	0.00749	0.9503	0.18605	0.00095	2631.3	32.17	2674.6	15.48	2707.5	8.46	2.8	2700
	9124-48.1	111.66	81.81	0.75686	0.01611	68	0	9.3e-07	2.079e-05	2e-05	0.20734	0.00278	12.94	0.25253	0.51113	0.00829	0.8885	0.18361	0.00166	2661.5	35.45	2675.3	18.56	2685.7	15	0.9	2700
	9124-49.1	98.83	70.25	0.73429	0.01665	60	1	1.783e-05	2.304e-05	0.00031	0.20134	0.00314	13.04	0.31603	0.50693	0.00922	0.8221	0.18656	0.00259	2643.5	39.56	2682.5	23.12	2712.1	23.12	2.5	2700
	9124-50.1	158.24	68.91	0.44986	0.00989	100	3	3.714e-05	1.611e-05	0.00064	0.12004	0.00139	15.436	0.26636	0.55252	0.00836	0.925	0.20262	0.00134	2835.6	34.82	2842.6	16.59	2847.4	10.8	0.4	2700
	9124-51.1	204.51	95.25	0.48112	0.01168	116	2	2.658e-05	1.39e-05	0.00046	0.1315	0.00147	12.63	0.21343	0.49928	0.00757	0.9402	0.18346	0.00106	2610.7	32.64	2652.4	16.03	2684.4	9.62	2.7	2700
	9124-52.1	92.31	74.07	0.82902	0.09972	56	1	2.1e-05	2.54e-05	0.00036	0.20357	0.00279	12.918	0.24869	0.50551	0.00809	0.8891	0.18534	0.00165	2637.4	34.74	2673.7	18.31	2701.3	14.74	2.4	2700
	9124-53.1	26.3	4.35	0.17092	0.00578	15	0	2.42e-05	0.00012109	0.00042	0.04401	0.00499	14.134	0.39884	0.52952	0.00983	0.7422	0.19359	0.00369	2739.4	41.56	2758.7	27.12	2772.9	31.61	1.2	2700
	9124-54.1	24.99	10.59	0.43761	0.01142	16	2	0.00013449	9.227e-05	0.00233	0.11845	0.00531	15.149	0.35022	0.54997	0.00908	0.7913	0.19978	0.00285	2825.1	37.88	2824.7	22.26	2824.4	23.45	0	2700
	9124-55.1	99.41	81.16	0.84345	0.01841	58	2	4.6e-05	2.038e-05	0.0008	0.23418	0.00612	11.585	0.20553	0.48357	0.00777	0.9462	0.17375	0.00101	2542.8	33.84	2571.5	16.72	2594.1	9.69	2	2700
	9124-57.1	94.45	55.27	0.60453	0.01459	56	1	3.038e-05	2.707e-05	0.00053	0.16443	0.00342	12.891	0.21456	0.50741	0.00755	0.9375	0.18426	0.00108	2645.6	32.36	2671.7	15.81	2691.6	9.68	1.7	2700
	9124-58.1	203.38	119.81	0.60855	0.01382	123	3	3.81e-05	1.383e-05	0.00066	0.16569	0.00151	13.213	0.20401	0.51905	0.00754	0.9714	0.18463	0.00068	2695.1	32.1	2695	14.68	2694.9	6.12	0	2700
	9124-59.1	96.58	28.66	0.30659	0.00751	57	0	5.04e-06	2.628e-05	9e-05	0.08329	0.00207	14.388	0.2903	0.53304	0.00936	0.9196	0.19577	0.00156	2754.3	39.47	2775.6	19.34	2791.2	13.14	1.3	2700
	9124-60.1	132.4	130.1	1.0151	0.02137	85	2	3.26e-05	1.72e-05	0.00056	0.27984	0.00228	12.86	0.20551	0.50736	0.00746	0.9569	0.18384	0.00086	2645.3	31.99	2669.5	15.17	2687.8	7.75	1.6	2700
	9124-61.1	151.13	132.46	0.90544	0.02021	96	1	1.178e-05	1.137e-05	0.0002	0.25539	0.00215	13.174	0.23612	0.51257	0.0078	0.9029	0.18641	0.00145	2667.6	33.32	2692.2	17.06	2710.7	12.86	1.6	2700
	9124-63.1	89.97	43.49	0.49938	0.01184	58	1	2.362e-05	2.111e-05	0.00041	0.13679	0.00189	15.939	0.28661	0.55714	0.00829	0.8858	0.20749	0.00175	2854.8	34.4	2873.1	17.33	2886	13.72	1.1	2700
	9124-64.1	86.92	74.5	0.88538	0.02124	56	2	4.607e-05	2.585e-05	0.0008	0.24577	0.00276	13.309	0.2276	0.51777	0.00807	0.9507	0.18642	0.001	2689.7	34.38	2701.8	16.28	2710.9	8.84	0.8	2700
	9124-65.1	90.71	60.78	0.69219	0.01502	55	0	1.062e-05	4.16e-05	0.00018	0.19181	0.00263	13.183	0.25826	0.51136	0.00898	0.9399	0.18698	0.00126	2662.4	38.44	2692.9	18.66	2715.8	11.16	2	2700
	9124-66.1	169.1	186.9	1.1418	0.0238	111	2	2.278e-05	2.336e-05	0.00039	0.31728	0.00242	13.039	0.21965	0.5087	0.00784	0.9528	0.1859	0.00096	2651.1	33.57	2682.5	16.01	2706.2	8.54	2	2700
	9124-68.1	86.66	38.26	0.4561	0.01084	50	4	0.00010038	3.325e-05	0.00174	0.12354	0.00248	13.072	0.23337	0.51037	0.00788	0.9152	0.18576	0.00135	2658.2	33.7	2684.8	16.98	2704.9	12.02	1.7	2700
	9124-70.1	85.88	87.25	1.0495	0.02382	56	0	1.156e-05	2.6e-05	0.0002	0.28624	0.00356	13.029	0.25657	0.5134	0.00878	0.9184	0.18406	0.00145	2671.1	37.51	2681.8	18.74	2689.8	13.04	0.7	2700
	9124-71.1	18.09	25.49	1.4561	0.04306	12	0	1e-05	1e-05	0.00017	0.39212	0.00708	11.555	0.31564	0.48834	0.00875	0.7405	0.17161	0.00318	2563.5	38	2569.1	25.85	2573.4	31.26	0.4	2700
																											2700
	Unit:	Cheno Formation
	Sample:	06RAT-13/z9123
	Session Mount:	IP421
	Geographic location:	Cuesta Lake, near Cheno River, north of Lac Mistassini
	Lithology:	Pebbly quartz wacke
	Latitude:	51.4483
	Longitude:	72.7472
	Labels	U	Th	Th	± Th	Pb*	204Pb	204Pb	± 204Pb		208*Pb	± 208Pb	207*Pb	±207Pb	206*Pb	±206Pb	Corr	207*Pb	±207Pb	206Pb	±206Pb	207Pb	±207Pb	207Pb	±207Pb	Disc.
		(ppm)	(ppm)	U	U	(ppm)	(ppb)	206Pb	206Pb	f(206)204	206*Pb	206Pb	235U	235U	238U	238U	Coeff	206*Pb	206Pb	238U	238U	206Pb	206Pb	206Pb	206Pb	(%)
	9123-1.1	183.55	127.9	0.71982	0.0151	112	2	2.272e-05	2.023e-05	0.00039	0.19761	0.0031	13.0568	0.15289	0.51365	0.00543	0.9438	0.18436	0.00072	2672.19	23.15	2683.77	11.1	2692.5	6.46	0.8	t1
	9123-2.1	172.98	154.9	0.92513	0.01929	108	1	1e-05	1e-05	0.00017	0.25598	0.00271	12.9284	0.18848	0.5052	0.00564	0.8351	0.1856	0.0015	2636.11	24.2	2674.45	13.83	2703.57	13.4	2.5	2700
	9123-3.1	205.09	112.82	0.56829	0.01261	122	0	3.53e-06	1.971e-05	6e-05	0.15947	0.00187	13.168	0.16993	0.51324	0.00542	0.8781	0.18608	0.00116	2670.43	23.12	2691.77	12.25	2707.83	10.31	1.4	2700
	9123-4.1	145.35	76.74	0.54538	0.01152	86	1	1e-05	1e-05	0.00017	0.14912	0.00169	13.0727	0.21155	0.51572	0.00638	0.8338	0.18385	0.00166	2680.98	27.18	2684.91	15.38	2687.87	14.96	0.3	2700
	9123-5.1	94	109.74	1.20599	0.02778	60	0	7.47e-06	3.761e-05	0.00013	0.32597	0.00815	12.4899	0.47768	0.48737	0.01268	0.762	0.18586	0.00464	2559.3	55.2	2641.97	36.61	2705.91	41.8	5.4	2700
	9123-6.1	121.57	69.77	0.59285	0.01261	75	1	1e-05	1e-05	0.00017	0.16397	0.0016	14.2001	0.18071	0.53065	0.00591	0.9234	0.19408	0.00096	2744.18	24.94	2763.16	12.14	2777.06	8.09	1.2	2700
	9123-7.1	317.84	69.48	0.22584	0.00502	176	1	1e-05	1e-05	0.00017	0.06209	0.00069	13.1548	0.16938	0.5146	0.00558	0.8979	0.1854	0.00106	2676.26	23.8	2690.82	12.22	2701.79	9.46	0.9	2700
	9123-8.1	33.05	28.84	0.90128	0.02482	22	1	8.599e-05	5.759e-05	0.00149	0.24788	0.00451	14.7543	0.3032	0.54192	0.00931	0.8925	0.19746	0.00184	2791.5	39.03	2799.53	19.73	2805.32	15.36	0.5	2700
	9123-9.1	154.71	63.98	0.42719	0.00906	88	1	1e-05	1e-05	0.00017	0.12015	0.00136	12.8962	0.18344	0.50537	0.00594	0.8846	0.18508	0.00124	2636.83	25.47	2672.1	13.49	2698.89	11.08	2.3	2700
	9123-10.1	23.07	9.88	0.44239	0.01608	14	0	1e-05	1e-05	0.00017	0.12608	0.00692	14.0691	0.26372	0.5269	0.00726	0.8095	0.19366	0.00215	2728.37	30.74	2754.38	17.93	2773.49	18.31	1.6	2700
	9123-11.1	164.1	63.42	0.39928	0.00845	94	0	7.6e-07	1.755e-05	1e-05	0.11171	0.00153	13.0516	0.19335	0.51106	0.00616	0.8744	0.18522	0.00134	2661.17	26.32	2683.39	14.07	2700.17	12.01	1.4	2700
	9123-12.1	288.89	140.08	0.50091	0.01128	167	1	1e-05	1e-05	0.00017	0.13509	0.00098	12.9512	0.22459	0.50905	0.00547	0.7082	0.18452	0.00228	2652.57	23.4	2676.11	16.48	2693.94	20.53	1.5	2700
	9123-13.1	111.08	89.43	0.83167	0.01763	70	0	1e-05	1e-05	0.00017	0.23094	0.00393	13.2066	0.20125	0.51674	0.0061	0.8425	0.18536	0.00153	2685.34	25.98	2694.53	14.49	2701.43	13.72	0.6	2700
	9123-14.1	145.52	71.66	0.50872	0.01303	85	1	1e-05	1e-05	0.00017	0.14	0.00325	13.1379	0.15709	0.51485	0.0055	0.9374	0.18507	0.00078	2677.3	23.45	2689.61	11.34	2698.87	6.95	0.8	2700
	9123-15.1	262.45	204.86	0.80637	0.01707	163	0	2.75e-06	1.4e-05	5e-05	0.22432	0.00169	12.8865	0.19644	0.51358	0.00623	0.86	0.18198	0.00143	2671.89	26.59	2671.39	14.47	2671.02	13.04	0	2700
	9123-16.1	89.94	109.58	1.25856	0.0281	62	0	1e-05	1e-05	0.00017	0.34461	0.00422	13.3517	0.24184	0.52423	0.008	0.8984	0.18472	0.00148	2717.09	33.94	2704.85	17.26	2695.72	13.31	-0.8	2700
	9123-17.1	72.15	81.88	1.1723	0.02786	48	0	1e-05	1e-05	0.00017	0.32318	0.00416	12.9548	0.16865	0.51445	0.00575	0.9111	0.18263	0.00099	2675.61	24.54	2676.37	12.35	2676.94	8.98	0	2700
	9123-18.1	130.58	103.51	0.81891	0.01714	83	1	1e-05	1e-05	0.00017	0.23242	0.00322	13.3412	0.16437	0.52121	0.00567	0.9291	0.18564	0.00085	2704.3	24.06	2704.1	11.7	2703.95	7.6	0	2700
	9123-19.1	36.68	14.06	0.39598	0.01147	23	0	1e-05	1e-05	0.00017	0.10929	0.00226	15.991	0.23886	0.56158	0.00689	0.8808	0.20652	0.00147	2873.15	28.5	2876.26	14.38	2878.44	11.63	0.2	2700
	9123-20.1	141.04	52.1	0.38164	0.00826	82	1	1e-05	1e-05	0.00017	0.10474	0.00146	13.5724	0.18993	0.52584	0.00624	0.9019	0.1872	0.00114	2723.91	26.4	2720.34	13.32	2717.69	10.08	-0.2	2700
	9123-21.1	281.22	204.84	0.75246	0.01618	172	4	3.215e-05	9.46e-06	0.00056	0.20978	0.00151	13.0003	0.16643	0.51041	0.00569	0.92	0.18473	0.00093	2658.37	24.32	2679.67	12.14	2695.79	8.38	1.4	2700
	9123-22.1	206.11	174.77	0.87601	0.01934	131	0	2.05e-06	1.379e-05	4e-05	0.24359	0.00291	13.1387	0.20089	0.51472	0.00642	0.8768	0.18513	0.00137	2676.77	27.4	2689.66	14.53	2699.37	12.29	0.8	2700
	9123-23.1	212.7	234.61	1.13946	0.02342	142	2	2.315e-05	1.322e-05	0.0004	0.31145	0.00185	13.147	0.1509	0.5199	0.00548	0.9551	0.1834	0.00063	2698.75	23.27	2690.26	10.89	2683.89	5.68	-0.6	2700
	9123-24.1	132.2	91.17	0.71247	0.01495	80	1	1.758e-05	1.912e-05	0.0003	0.19515	0.00177	13.0032	0.19996	0.51107	0.0061	0.8441	0.18453	0.00153	2661.18	26.09	2679.89	14.6	2694.04	13.8	1.2	2700
	9123-25.1	114.87	103.88	0.93422	0.01975	73	2	3.177e-05	3.725e-05	0.00055	0.25877	0.00433	13.0532	0.17846	0.51411	0.00597	0.9035	0.18415	0.00109	2674.15	25.47	2683.51	12.98	2690.57	9.79	0.6	2700
	9123-26.1	115.76	129.54	1.15602	0.02426	76	0	1e-05	1e-05	0.00017	0.31784	0.02455	12.9022	0.42115	0.50352	0.00603	0.4775	0.18584	0.00537	2628.9	25.9	2672.54	31.23	2705.72	48.52	2.8	2700
	9123-27.1	118.77	117.47	1.02173	0.02133	77	1	1e-05	1e-05	0.00017	0.27744	0.00271	13.2222	0.20293	0.51531	0.00643	0.8746	0.18609	0.0014	2679.26	27.43	2695.65	14.59	2707.95	12.43	1.1	2700
	9123-28.1	43.59	37.71	0.89361	0.02006	29	1	3.815e-05	0.00012431	0.00066	0.24374	0.00805	15.0209	0.2776	0.54209	0.00671	0.7526	0.20097	0.00246	2792.2	28.11	2816.57	17.75	2834.06	20.15	1.5	2700
	9123-29.1	257.5	359	1.44025	0.03526	181	1	1e-05	1e-05	0.00017	0.40619	0.07659	13.1203	4.03631	0.51265	0.09705	0.7048	0.18562	0.04083	2667.94	427.47	2688.34	341.84	2703.71	418.48	1.3	2700
	9123-30.1	151.12	127.94	0.87459	0.0845	97	1	2.161e-05	1.754e-05	0.00037	0.2309	0.0247	13.4241	2.53981	0.52602	0.07537	0.828	0.18509	0.01979	2724.66	326.53	2709.96	196.66	2699.02	188.43	-0.9	2700
	9123-31.1	49.13	29.17	0.61338	0.01686	33	0	1e-05	1e-05	0.00017	0.1672	0.00276	16.5415	0.25286	0.56384	0.00688	0.8624	0.21277	0.00166	2882.49	28.44	2908.63	14.74	2926.78	12.67	1.5	2700
	9123-32.1	165.79	71.4	0.44493	0.00935	99	1	1.56e-05	4.931e-05	0.00027	0.1214	0.00216	13.5506	0.18983	0.52837	0.00581	0.851	0.186	0.00138	2734.6	24.55	2718.82	13.33	2707.13	12.29	-1	2700
	9123-33.1	146.53	184.5	1.30077	0.02698	100	1	2.03e-05	2.132e-05	0.00035	0.36747	0.00242	12.99	0.17136	0.50982	0.00567	0.8986	0.1848	0.00108	2655.85	24.26	2678.93	12.51	2696.38	9.67	1.5	2700
	9123-34.1	152.86	91.37	0.61752	0.01547	92	3	4.593e-05	2.553e-05	0.0008	0.16887	0.00178	13.1783	0.20359	0.51361	0.00663	0.8925	0.18609	0.00131	2672.03	28.3	2692.5	14.69	2707.91	11.64	1.3	2700
	9123-35.1	44.51	41.71	0.96796	0.02295	29	0	1e-05	1e-05	0.00017	0.26925	0.00508	13.2629	0.20861	0.51551	0.0067	0.8847	0.18659	0.00138	2680.11	28.55	2698.54	14.96	2712.37	12.24	1.2	2700
	9123-36.1	131.38	65.01	0.51115	0.01189	78	1	1e-05	1e-05	0.00017	0.13815	0.00208	13.2108	0.17214	0.51974	0.00591	0.9219	0.18435	0.00094	2698.07	25.13	2694.83	12.37	2692.4	8.43	-0.2	2700
	9123-37.1	21.28	7	0.3399	0.00945	13	3	0.00024923	9.642e-05	0.00432	0.08023	0.00456	14.8832	0.32383	0.55123	0.00765	0.7247	0.19582	0.00296	2830.3	31.87	2807.8	20.92	2791.68	24.96	-1.4	2700
	9123-38.1	38.86	27.94	0.74275	0.01959	24	3	0.00014556	7.403e-05	0.00252	0.1997	0.00486	13.1128	0.32014	0.5177	0.00887	0.7805	0.1837	0.00283	2689.41	37.78	2687.8	23.3	2686.59	25.66	-0.1	2700
	9123-39.1	72.18	48.84	0.69901	0.01659	43	1	3.625e-05	6.554e-05	0.00063	0.19944	0.00629	12.8688	0.23768	0.49907	0.007	0.8302	0.18702	0.00194	2609.79	30.19	2670.09	17.55	2716.09	17.21	3.9	2700
	9123-40.1	51.88	78.11	1.55537	0.04221	37	4	0.00018983	4.377e-05	0.00329	0.42148	0.00465	12.9708	0.2189	0.52029	0.00654	0.8171	0.18081	0.00177	2700.39	27.78	2677.53	16.04	2660.32	16.35	-1.5	2700
	9123-42.1	43.98	14.58	0.34251	0.00872	28	0	1.446e-05	0.00013029	0.00025	0.09872	0.00533	16.2517	0.36794	0.56939	0.00856	0.748	0.20701	0.00314	2905.3	35.27	2891.72	21.89	2882.28	24.81	-0.8	2700
	9123-43.1	101.72	66.86	0.67901	0.0149	63	0	1e-05	1e-05	0.00017	0.1873	0.00184	13.376	0.17992	0.52457	0.00634	0.9413	0.18494	0.00085	2718.53	26.87	2706.57	12.79	2697.65	7.58	-0.8	2700
	9123-44.1	165.14	185.73	1.16187	0.02478	111	4	4.781e-05	1.776e-05	0.00083	0.31863	0.00238	13.2041	0.17492	0.51981	0.00586	0.9048	0.18423	0.00105	2698.37	24.91	2694.35	12.58	2691.34	9.43	-0.3	2700
	9123-45.1	163.14	48.08	0.30443	0.00797	92	0	1.42e-06	2.79e-05	2e-05	0.08565	0.0016	13.2174	0.23355	0.51448	0.00701	0.8397	0.18633	0.0018	2675.73	29.92	2695.3	16.82	2710.01	16.04	1.3	2700
	9123-46.1	160.25	109.65	0.70684	0.01476	98	1	1.428e-05	1.643e-05	0.00025	0.19401	0.00192	13.1999	0.18444	0.51598	0.00609	0.8992	0.18554	0.00114	2682.12	25.93	2694.05	13.28	2703.01	10.21	0.8	2700
	9123-47.1	46.27	30.13	0.67254	0.01625	28	0	1e-05	1e-05	0.00017	0.18452	0.00292	13.5832	0.24689	0.52069	0.00695	0.8086	0.1892	0.00204	2702.13	29.53	2721.1	17.34	2735.21	17.85	1.2	2700
	9123-48.1	222.56	130.05	0.60366	0.01446	135	1	1e-05	1e-05	0.00017	0.16854	0.00285	13.3464	0.16743	0.52222	0.00579	0.93	0.18536	0.00086	2708.58	24.56	2704.47	11.92	2701.4	7.69	-0.3	2700
	9123-49.1	81.6	107.78	1.36445	0.0314	57	0	3.16e-06	2.97e-05	5e-05	0.37198	0.00389	13.2841	0.2619	0.5184	0.00702	0.7673	0.18585	0.00237	2692.37	29.85	2700.05	18.79	2705.8	21.19	0.5	2700
	9123-50.1	110.18	70.65	0.66247	0.01688	67	1	1.289e-05	2.377e-05	0.00022	0.18013	0.00225	13.0444	0.18412	0.51732	0.00607	0.8887	0.18288	0.00119	2687.81	25.83	2682.87	13.4	2679.15	10.83	-0.3	2700
	9123-51.1	237.88	193.12	0.83868	0.01755	148	1	1e-05	1e-05	0.00017	0.22777	0.00154	13.0262	0.16168	0.51095	0.00563	0.9332	0.1849	0.00083	2660.69	24.07	2681.55	11.77	2697.32	7.44	1.4	2700
	9123-52.1	177.16	193.87	1.13051	0.02327	119	2	2.349e-05	2.487e-05	0.00041	0.31505	0.00364	13.3613	0.16441	0.51757	0.00548	0.9121	0.18723	0.00095	2688.87	23.32	2705.52	11.69	2717.99	8.41	1.1	2700
	9123-53.1	293.95	135.66	0.47676	0.00982	170	3	2.163e-05	1.142e-05	0.00037	0.13185	0.00176	12.9422	0.15776	0.51154	0.00545	0.9225	0.1835	0.00087	2663.21	23.28	2675.45	11.55	2684.72	7.86	0.8	2700
	9123-54.1	90.72	44.51	0.50682	0.01155	58	1	2.691e-05	3.071e-05	0.00047	0.13797	0.00229	15.3602	0.26589	0.55664	0.00777	0.8691	0.20014	0.00173	2852.71	32.28	2837.85	16.64	2827.31	14.15	-0.9	2700
	9123-55.1	61.55	27.76	0.46586	0.01099	36	0	1e-05	1e-05	0.00017	0.12662	0.00356	13.1589	0.24299	0.51786	0.00649	0.7607	0.18429	0.00223	2690.11	27.63	2691.11	17.58	2691.87	20.1	0.1	2700
	9123-56.1	45.4	12.63	0.28747	0.00771	29	2	7.825e-05	6.165e-05	0.00136	0.08243	0.00312	16.302	0.3732	0.56585	0.00989	0.8334	0.20895	0.00266	2890.75	40.86	2894.68	22.14	2897.41	20.84	0.2	2700
	9123-57.1	114.42	80.7	0.72862	0.0178	71	2	3.829e-05	4.677e-05	0.00066	0.19758	0.00262	13.3779	0.21326	0.52416	0.00587	0.7808	0.18511	0.00186	2716.8	24.86	2706.7	15.17	2699.16	16.67	-0.7	2700
	9123-58.1	92.22	62.18	0.69654	0.01849	55	3	6.776e-05	6.745e-05	0.00117	0.19004	0.00362	12.6838	0.28233	0.50529	0.00839	0.8185	0.18206	0.00235	2636.48	36.04	2656.46	21.17	2671.7	21.5	1.3	2700
	9123-59.1	78.79	54.73	0.71761	0.0155	48	1	1.863e-05	4.395e-05	0.00032	0.19891	0.00268	13.0832	0.19916	0.51533	0.00673	0.9098	0.18413	0.00117	2679.33	28.68	2685.67	14.46	2690.45	10.56	0.4	2700
	9123-60.1	135.69	124.13	0.94508	0.02098	95	1	1.914e-05	1.852e-05	0.00033	0.25667	0.00336	15.6276	0.24713	0.55788	0.00675	0.8347	0.20317	0.00178	2857.87	28	2854.31	15.2	2851.8	14.37	-0.2	2700
	9123-61.1	191.22	161.56	0.87283	0.02031	119	11	0.00013385	4.969e-05	0.00232	0.23768	0.0025	12.9654	0.16338	0.50914	0.00545	0.9029	0.18469	0.00101	2652.95	23.3	2677.14	11.95	2695.46	9.05	1.6	2700
	9123-62.1	92.53	55.39	0.61846	0.01324	56	1	1.599e-05	2.562e-05	0.00028	0.17417	0.00235	13.0589	0.20433	0.51304	0.00587	0.8063	0.18461	0.00172	2669.59	25.08	2683.91	14.87	2694.72	15.49	0.9	2700
	9123-63.1	131.34	100.81	0.7929	0.01916	80	1	1.365e-05	2.588e-05	0.00024	0.21401	0.00309	12.7295	0.1884	0.50366	0.00649	0.9204	0.1833	0.00107	2629.52	27.9	2659.84	14.03	2682.99	9.68	2	2700
	9123-64.1	286.12	293.17	1.05852	0.02241	189	1	1e-05	1e-05	0.00017	0.29496	0.0018	13.1857	0.17705	0.51917	0.00567	0.8749	0.1842	0.00121	2695.68	24.12	2693.04	12.75	2691.05	10.87	-0.2	2700
																											2700
	Unit:	Upper Albanel Formation
	Sample:	06RAT-19/z9121
	Session Mount:	IP420
	Geographic location:	Lac Albanel
	Lithology:	Medium-grained, carbonate-cemented quartzarenite with heavy mineral laminae
	Latitude:	51.0953
	Longitude:	73.0767
	Labels	U	Th	Th	± Th	Pb*	204Pb	204Pb	± 204Pb		208*Pb	± 208Pb	207*Pb	±207Pb	206*Pb	±206Pb	Corr	207*Pb	±207Pb	206Pb	±206Pb	207Pb	±207Pb	207Pb	±207Pb	Disc.
		(ppm)	(ppm)	U	U	(ppm)	(ppb)	206Pb	206Pb	f(206)204	206*Pb	206Pb	235U	235U	238U	238U	Coeff	206*Pb	206Pb	238U	238U	206Pb	206Pb	206Pb	206Pb	(%)
	9121-1.1	89.83	31.05	0.35704	0.00827	50	0	8.41e-06	2.988e-05	0.00015	0.10098	0.00185	12.9808	0.24608	0.49878	0.00812	0.9106	0.18875	0.00149	2608.57	35.01	2678.26	18.03	2731.3	13.06	4.5	t1
	9121-8.1	38.45	31.67	0.85079	0.02751	25	0	1.731e-05	5.638e-05	0.0003	0.23948	0.00651	13.6442	0.26537	0.51964	0.00863	0.9072	0.19043	0.00157	2697.67	36.72	2725.33	18.57	2745.89	13.63	1.8	2700
	9121-4.1	131.39	67.17	0.52809	0.01323	84	1	9.72e-06	1.762e-05	0.00017	0.1415	0.00147	16.1887	0.36178	0.54488	0.00794	0.737	0.21548	0.00328	2803.84	33.21	2888.01	21.6	2947.23	24.8	4.9	2700
	9121-5.1	151.03	153.22	1.04804	0.02347	100	2	2.539e-05	1.707e-05	0.00044	0.29186	0.00372	13.1768	0.20738	0.51884	0.00764	0.9671	0.18419	0.00074	2694.27	32.49	2692.4	14.96	2690.99	6.68	-0.1	2700
	9121-7.1	66.64	82.41	1.27762	0.02801	47	0	1e-05	1e-05	0.00017	0.3583	0.00342	13.8797	0.2585	0.5277	0.00871	0.9321	0.19076	0.0013	2731.77	36.87	2741.54	17.79	2748.73	11.22	0.6	2700
	9121-6.1	195.32	110.06	0.58213	0.01363	122	2	1.823e-05	1.381e-05	0.00032	0.1601	0.00208	14.7401	0.22775	0.53545	0.0078	0.9721	0.19965	0.00073	2764.38	32.82	2798.61	14.8	2823.38	5.98	2.1	2700
	9121-9.1	204.81	73.91	0.37282	0.00848	131	1	1e-05	1e-05	0.00017	0.09652	0.00093	17.0276	0.28413	0.56746	0.00819	0.9157	0.21763	0.00147	2897.4	33.78	2936.39	16.13	2963.22	10.94	2.2	2700
	9121-10.1	79	141.02	1.84405	0.03873	57	0	1.062e-05	2.777e-05	0.00018	0.49846	0.00793	12.5761	0.22967	0.49495	0.00764	0.9001	0.18428	0.00148	2592.05	33.03	2648.43	17.32	2691.79	13.31	3.7	2700
	9121-14.1	88.69	59.62	0.69451	0.01756	54	1	2.903e-05	2.707e-05	0.0005	0.19141	0.00235	13.1593	0.26672	0.51549	0.00841	0.8675	0.18514	0.00188	2680.04	35.87	2691.14	19.31	2699.49	16.88	0.7	2700
	9121-17.1	113.81	49.15	0.44616	0.00964	66	1	1.097e-05	2.307e-05	0.00019	0.13187	0.00204	13.3677	0.29697	0.51259	0.00877	0.8386	0.18914	0.00231	2667.68	37.48	2705.98	21.21	2734.7	20.22	2.5	2700
	9121-18.1	159.2	70.81	0.45952	0.01058	95	2	3.095e-05	2.717e-05	0.00054	0.12384	0.00149	14.1786	0.22761	0.52762	0.00791	0.9665	0.1949	0.00081	2731.41	33.47	2761.73	15.34	2783.96	6.82	1.9	2700
	9121-19.1	109.01	82.82	0.78489	0.01797	68	0	1e-05	1e-05	0.00017	0.22147	0.00388	13.1044	0.24662	0.51233	0.00822	0.9061	0.18551	0.00149	2666.58	35.14	2687.2	17.91	2702.74	13.31	1.3	2700
	9121-21.1	54.72	51.31	0.9687	0.02205	35	1	5.219e-05	5.333e-05	0.0009	0.25962	0.00422	12.8997	0.29566	0.51386	0.00907	0.8386	0.18207	0.00229	2673.08	38.73	2672.36	21.83	2671.81	20.99	0	2700
	9121-24.1	25.69	20.07	0.8073	0.01967	15	2	0.00017098	0.00010754	0.00296	0.21863	0.00559	11.9468	0.27393	0.48837	0.00805	0.7956	0.17742	0.00248	2563.62	34.98	2600.24	21.71	2628.9	23.47	2.5	2700
	9121-25.1	191.43	72.08	0.38898	0.00815	108	1	1.04e-05	2.536e-05	0.00018	0.10434	0.00133	13.0222	0.20439	0.50706	0.00744	0.967	0.18626	0.00075	2644.06	31.91	2681.26	14.91	2709.43	6.66	2.4	2700
	9121-26.1	55.64	25.46	0.47274	0.0107	33	0	1e-05	1e-05	0.00017	0.13475	0.00204	13.7744	0.23251	0.51518	0.00777	0.9371	0.19392	0.00115	2678.69	33.13	2734.32	16.11	2775.67	9.77	3.5	2700
	9121-32.1	194.36	274.65	1.45986	0.03095	130	1	1e-05	1e-05	0.00017	0.40369	0.00515	11.9747	0.19943	0.49004	0.00705	0.9148	0.17723	0.0012	2570.83	30.58	2602.43	15.73	2627.11	11.31	2.1	2700
	9121-35.1	99.13	106.35	1.10838	0.0267	65	3	5.777e-05	3.385e-05	0.001	0.30324	0.00312	12.9893	0.24007	0.51284	0.00794	0.8937	0.1837	0.00154	2668.72	33.9	2678.88	17.58	2686.55	13.88	0.7	2700
	9121-36.1	212.98	128.57	0.62365	0.01348	113	1	1.018e-05	1.074e-05	0.00018	0.17609	0.0032	10.445	0.18236	0.46185	0.00705	0.9228	0.16402	0.00111	2447.74	31.16	2475.05	16.31	2497.54	11.46	2	2700
	9121-39.1	212.93	115.05	0.55819	0.01197	123	1	1.579e-05	1.702e-05	0.00027	0.15128	0.00132	12.7966	0.19678	0.50353	0.00731	0.9732	0.18432	0.00066	2628.93	31.43	2664.79	14.59	2692.12	5.9	2.3	2700
	9121-37.1	39.25	26.51	0.6977	0.01666	23	0	2.746e-05	7.323e-05	0.00048	0.19362	0.00608	12.9557	0.32626	0.49836	0.01013	0.8696	0.18855	0.00236	2606.74	43.74	2676.44	24.02	2729.52	20.79	4.5	2700
	9121-38.1	39.78	19.8	0.51414	0.01231	24	0	1.695e-05	7.303e-05	0.00029	0.143	0.00377	13.5777	0.28663	0.51461	0.00923	0.9035	0.19136	0.00174	2676.29	39.4	2720.72	20.16	2753.87	15.06	2.8	2700
	9121-42.1	162.8	121.08	0.76834	0.0165	107	0	5.3e-06	1.538e-05	9e-05	0.20701	0.00191	15.0159	0.24176	0.54439	0.00812	0.9613	0.20005	0.00089	2801.78	33.99	2816.24	15.44	2826.62	7.32	0.9	2700
	9121-45.1	125.14	53.62	0.44265	0.01763	74	0	2.56e-06	1.739e-05	4e-05	0.12336	0.00753	13.8904	1.46633	0.52011	0.03174	0.6714	0.1937	0.01527	2699.64	136.02	2742.26	105.26	2773.79	135.53	2.7	2700
	9121-47.1	34.12	22.21	0.67254	0.01699	23	1	7.52e-05	5.354e-05	0.0013	0.18254	0.00394	16.0138	0.36186	0.55191	0.00973	0.8469	0.21044	0.00255	2833.11	40.53	2877.62	21.83	2908.93	19.76	2.6	2700
	9121-48.1	163.57	111.06	0.70142	0.01479	99	2	3.366e-05	1.774e-05	0.00058	0.18845	0.00159	13.0193	0.2101	0.51471	0.00744	0.9391	0.18345	0.00103	2676.71	31.75	2681.05	15.33	2684.33	9.27	0.3	2700
	9121-49.1	125.33	116.24	0.95814	0.02213	80	1	1.576e-05	1.439e-05	0.00027	0.27224	0.00209	13.0518	0.22648	0.50934	0.00807	0.9515	0.18585	0.001	2653.79	34.54	2683.41	16.5	2705.8	8.91	1.9	2700
	9121-53.1	161.87	101.79	0.64966	0.01497	97	0	2.25e-06	2.437e-05	4e-05	0.18258	0.00477	13.0136	0.23837	0.50922	0.00763	0.8782	0.18535	0.00164	2653.31	32.67	2680.64	17.42	2701.32	14.65	1.8	2700
	9121-54.1	159.67	107.41	0.6949	0.01459	96	4	5.26e-05	7.937e-05	0.00091	0.19102	0.0033	12.9605	0.22755	0.50795	0.00755	0.9015	0.18505	0.00142	2647.88	32.37	2676.78	16.69	2698.69	12.71	1.9	2700
	9121-56.1	69.82	43.22	0.63954	0.01725	42	0	6.58e-06	5.384e-05	0.00011	0.1736	0.00304	13.1462	0.22974	0.51566	0.00775	0.9114	0.1849	0.00134	2680.76	33.03	2690.2	16.63	2697.31	12.02	0.6	2700
	9121-58.1	140.72	146.48	1.07531	0.02266	90	0	7.4e-07	2.373e-05	1e-05	0.29097	0.00241	12.9315	0.21436	0.50279	0.00774	0.9625	0.18653	0.00085	2625.79	33.27	2674.68	15.74	2711.84	7.5	3.2	2700
	9121-75.1	198.31	174.19	0.90743	0.0195	127	0	5.39e-06	1.403e-05	9e-05	0.25003	0.00298	13.272	0.21873	0.51806	0.00754	0.9294	0.1858	0.00114	2690.96	32.09	2699.19	15.68	2705.37	10.15	0.5	2700
	9121-74.1	154.19	113.84	0.76271	0.02045	94	1	1e-05	1e-05	0.00017	0.20852	0.00407	13.0508	0.37721	0.50868	0.01102	0.8216	0.18608	0.00309	2650.99	47.27	2683.33	27.63	2707.79	27.67	2.1	2700
	9121-73.1	106.19	76.23	0.74162	0.01697	71	0	7.15e-06	2.119e-05	0.00012	0.20502	0.00413	15.5803	0.25105	0.55241	0.00825	0.9613	0.20456	0.00092	2835.2	34.34	2851.41	15.49	2862.89	7.3	1	2700
	9121-70.1	79.68	28.33	0.3673	0.00895	46	3	7.753e-05	4.093e-05	0.00134	0.10187	0.00219	13.4752	0.26146	0.52044	0.00866	0.9098	0.18779	0.00152	2701.05	36.82	2713.55	18.51	2722.86	13.43	0.8	2700
	9121-68.1	49.57	33.71	0.70251	0.02153	32	3	0.00010966	5.129e-05	0.0019	0.19179	0.00421	14.339	0.36774	0.53915	0.01063	0.8374	0.19289	0.00272	2779.89	44.66	2772.4	24.64	2766.95	23.37	-0.5	2700
	9121-69.1	98.31	65.34	0.68659	0.0163	59	0	4.64e-06	2.488e-05	8e-05	0.19691	0.00231	12.3552	0.20984	0.50399	0.00783	0.9528	0.1778	0.00092	2630.92	33.64	2631.77	16.08	2632.43	8.66	0.1	2700
	9121-63.1	219.25	93.78	0.44185	0.00961	125	1	8.92e-06	5.94e-06	0.00015	0.12084	0.00126	12.7162	0.21794	0.50964	0.00755	0.9155	0.18096	0.00126	2655.09	32.34	2658.86	16.26	2661.73	11.56	0.2	2700
	9121-61.1	83.35	47.83	0.59284	0.0131	51	3	7.024e-05	3.346e-05	0.00122	0.15421	0.00225	14.5443	0.26925	0.52866	0.00786	0.8661	0.19953	0.00186	2735.79	33.23	2785.9	17.74	2822.39	15.31	3.1	2700
	9121-79.1	46.65	38.5	0.85269	0.02473	28	1	7.5e-05	7.52e-05	0.0013	0.23301	0.00436	12.1394	0.64498	0.49361	0.00773	0.4095	0.17837	0.00871	2586.28	33.43	2615.24	51.11	2637.74	83.52	2	2700
	9121-80.1	83.69	44.37	0.54771	0.01235	44	1	2.75e-05	3.004e-05	0.00048	0.15289	0.00217	10.4458	0.19802	0.46346	0.00728	0.8869	0.16347	0.00144	2454.82	32.15	2475.12	17.72	2491.83	14.95	1.5	2700
	9121-81.1	49.01	127.35	2.68459	0.10213	41	3	0.00012928	5.742e-05	0.00224	0.73612	0.01363	12.5306	0.29414	0.50806	0.00913	0.8352	0.17888	0.00233	2648.35	39.16	2645.02	22.32	2642.48	21.77	-0.2	2700
	9121-82.1	134.29	104.05	0.80039	0.01682	82	1	2.09e-05	2.514e-05	0.00036	0.21012	0.00212	13.0315	0.2294	0.51124	0.00755	0.8947	0.18487	0.00146	2661.92	32.27	2681.94	16.74	2697.06	13.15	1.3	2700
	9121-83.1	94.89	99.17	1.07959	0.02301	57	2	6.454e-05	3.106e-05	0.00112	0.30152	0.00295	11.3992	0.20957	0.46957	0.00778	0.9428	0.17606	0.00109	2481.68	34.2	2556.36	17.31	2616.15	10.32	5.1	2700
	9121-86.1	97.82	68.79	0.72647	0.01786	57	1	2.07e-05	3.039e-05	0.00036	0.20276	0.00255	12.0541	0.23153	0.48762	0.00793	0.9015	0.17929	0.0015	2560.37	34.47	2608.62	18.17	2646.3	13.97	3.2	2700
	9121-87.1	241.96	51.88	0.22149	0.00503	128	1	9.72e-06	1.215e-05	0.00017	0.06058	0.00086	12.2271	0.18354	0.49511	0.00708	0.9788	0.17911	0.00055	2592.76	30.61	2621.99	14.19	2644.64	5.15	2	2700
	9121-89.1	103.38	54.04	0.54003	0.01256	60	3	5.668e-05	0.00011283	0.00098	0.13753	0.00545	13.2518	0.27721	0.51139	0.00832	0.8452	0.18794	0.00212	2662.56	35.59	2697.76	19.94	2724.24	18.68	2.3	2700
	9121-92.1	145.24	109.07	0.7758	0.01924	85	1	1e-05	1e-05	0.00017	0.21276	0.00218	11.815	0.19241	0.48673	0.00729	0.9562	0.17605	0.00085	2556.53	31.68	2589.85	15.36	2616.03	8.02	2.3	2700
	9121-94.1	125.76	52.11	0.42809	0.01046	70	0	7.78e-06	3.232e-05	0.00013	0.12061	0.00341	12.4945	0.21416	0.50017	0.0076	0.9323	0.18118	0.00113	2614.53	32.75	2642.32	16.24	2663.66	10.39	1.8	2700
	9121-95.1	99.45	59.91	0.62227	0.01597	62	2	4.011e-05	1.807e-05	0.0007	0.1711	0.00585	14.4753	0.25947	0.53002	0.00863	0.9486	0.19808	0.00113	2741.53	36.48	2781.38	17.17	2810.42	9.37	2.5	2700
	9121-93.1	88.37	86.38	1.00977	0.025	54	1	2.415e-05	2.639e-05	0.00042	0.27578	0.00317	12.313	0.21583	0.48933	0.00754	0.9264	0.1825	0.00121	2567.77	32.72	2628.57	16.6	2675.72	11.05	4	2700
	9121-98.1	80.65	29.25	0.37473	0.00839	42	3	9.026e-05	5.865e-05	0.00156	0.10168	0.00279	11.56	0.25882	0.47869	0.00838	0.8485	0.17515	0.00209	2521.55	36.63	2569.44	21.14	2607.44	20.03	3.3	2700
	9121-97.1	94.44	101.29	1.10807	0.02506	61	3	7.386e-05	2.733e-05	0.00128	0.29659	0.0056	13.1151	0.27079	0.50921	0.0076	0.7988	0.1868	0.00234	2653.24	32.55	2687.97	19.67	2714.19	20.8	2.2	2700
	9121-100.1	13.67	11.43	0.86393	0.02458	8	1	0.00011099	0.00023125	0.00192	0.23204	0.01073	11.7111	0.48196	0.49459	0.01317	0.7327	0.17173	0.00485	2590.5	57.04	2581.59	39.25	2574.61	47.96	-0.6	2700
	9121-102.1	94.9	24.84	0.27036	0.00704	50	2	4.909e-05	2.982e-05	0.00085	0.07475	0.00166	12.1257	0.20264	0.48996	0.00736	0.9415	0.17949	0.00102	2570.5	31.93	2614.18	15.8	2648.19	9.45	2.9	2700
	9121-103.1	153.69	96.01	0.64535	0.01365	92	3	4.298e-05	2.053e-05	0.00074	0.18072	0.00214	13.051	0.22897	0.51188	0.00846	0.9716	0.18492	0.00077	2664.65	36.16	2683.35	16.68	2697.46	6.92	1.2	2700
	9121-106.1	248.47	312.06	1.29743	0.02644	165	1	1e-05	1e-05	0.00017	0.3634	0.00189	12.2107	0.19254	0.49983	0.00736	0.9659	0.17718	0.00073	2613.04	31.69	2620.73	14.91	2626.67	6.86	0.5	2700
	9121-108.1	60.93	54.26	0.91991	0.0215	37	2	6.85e-05	9.621e-05	0.00119	0.2522	0.00467	12.1465	0.25746	0.49799	0.00771	0.8048	0.1769	0.00224	2605.15	33.24	2615.78	20.08	2624.03	21.25	0.7	2700
	9121-111.1	81.57	48.22	0.61077	0.0139	43	0	1.338e-05	6.668e-05	0.00023	0.17531	0.00398	10.451	0.21629	0.45855	0.00772	0.8748	0.1653	0.00167	2433.14	34.22	2475.58	19.36	2510.6	17.1	3.1	2700
	9121-124.1	59.09	48.83	0.85373	0.02307	38	0	1.696e-05	5.567e-05	0.00029	0.22911	0.00374	14.1844	0.31415	0.52945	0.00858	0.8062	0.19431	0.00257	2739.14	36.26	2762.12	21.23	2778.95	21.82	1.4	2700
	9121-138.1	90.44	109.61	1.25196	0.03122	62	4	0.00011142	3.576e-05	0.00193	0.35318	0.00402	12.9478	0.27586	0.51793	0.00816	0.8129	0.18131	0.00227	2690.4	34.75	2675.86	20.28	2664.89	20.87	-1	2700
	9121-136.1	294.35	157.24	0.55187	0.44662	150	0	3.96e-06	1.742e-05	7e-05	0.12496	0.01584	11.1153	4.22373	0.45412	0.16515	0.9813	0.17752	0.01308	2413.54	777.18	2532.84	435.27	2629.85	128.05	8.2	2700
																											2700
	Unit:	Temiscamie Formation
	Sample:	06RAT-16/z9122
	Session Mount:	IP420
	Geographic location:	Lac Albanel
	Lithology:	Coarse-grained quartzarenite overlying karst on top of Albanel Fm.
	Latitude:	51.0636
	Longitude:	73.0372
	Labels	U	Th	Th	± Th	Pb*	204Pb	204Pb	± 204Pb		208*Pb	± 208Pb	207*Pb	±207Pb	206*Pb	±206Pb	Corr	207*Pb	±207Pb	206Pb	±206Pb	207Pb	±207Pb	207Pb	±207Pb	Disc.
		(ppm)	(ppm)	U	U	(ppm)	(ppb)	206Pb	206Pb	f(206)204	206*Pb	206Pb	235U	235U	238U	238U	Coeff	206*Pb	206Pb	238U	238U	206Pb	206Pb	206Pb	206Pb	(%)
	9122-81.1	30.05	10.21	0.35105	0.01426	17	2	0.00014785	6.701e-05	0.00256	0.0882	0.00358	13.1837	0.38154	0.51717	0.01088	0.8023	0.18489	0.00322	2687.16	46.41	2692.89	27.69	2697.2	29.05	0.4	t1
	9122-1.1	54.28	33.09	0.62964	0.01455	32	1	4.22e-05	3.093e-05	0.00073	0.17486	0.00279	12.4446	0.26301	0.50264	0.00843	0.8582	0.17956	0.00196	2625.15	36.27	2638.55	20.06	2648.85	18.26	0.9	2700
	9122-2.1	106.36	40.89	0.39714	0.00872	59	2	4.296e-05	2.087e-05	0.00074	0.10611	0.00187	12.6305	0.22353	0.50309	0.00808	0.9481	0.18208	0.00103	2627.08	34.77	2652.49	16.79	2671.93	9.42	1.7	2700
	9122-3.1	50.42	42.17	0.86418	0.0229	31	1	6.652e-05	3.825e-05	0.00115	0.23867	0.00609	12.8351	0.3033	0.5071	0.00804	0.7538	0.18357	0.00287	2644.22	34.49	2667.62	22.51	2685.42	26.11	1.5	2700
	9122-5.1	38.79	13.94	0.37135	0.01181	22	3	0.00017738	5.876e-05	0.00307	0.09563	0.00403	12.676	0.2753	0.50472	0.00808	0.8112	0.18215	0.00233	2634.03	34.73	2655.88	20.65	2672.56	21.35	1.4	2700
	9122-6.1	55.56	31.78	0.59083	0.01344	32	3	0.00011203	4.324e-05	0.00194	0.15774	0.00296	12.9395	0.26895	0.50521	0.0077	0.8073	0.18576	0.0023	2636.14	33.05	2675.26	19.78	2704.96	20.55	2.5	2700
	9122-8.1	79.22	40.28	0.52533	0.01288	45	1	3.875e-05	2.491e-05	0.00067	0.14576	0.00187	12.6841	0.23088	0.49736	0.00731	0.8693	0.18497	0.00168	2602.43	31.53	2656.48	17.28	2697.9	15.05	3.5	2700
	9122-11.1	123.26	136.95	1.14774	0.0243	80	1	1.292e-05	2.529e-05	0.00022	0.32248	0.00411	12.5234	0.22439	0.50081	0.00757	0.899	0.18136	0.00143	2617.29	32.61	2644.49	16.99	2665.36	13.16	1.8	2700
	9122-12.1	47.86	56.15	1.21211	0.03189	31	2	8.669e-05	0.00021115	0.0015	0.32779	0.01042	12.4008	0.34591	0.50178	0.00828	0.6836	0.17924	0.00368	2621.46	35.65	2635.24	26.55	2645.84	34.46	0.9	2700
	9122-13.1	92.78	71.64	0.79764	0.01728	56	0	8.53e-06	1.655e-05	0.00015	0.2108	0.00425	12.6201	0.22637	0.49849	0.00768	0.9112	0.18361	0.00137	2607.29	33.14	2651.72	17.02	2685.79	12.37	2.9	2700
	9122-14.1	66.9	40.37	0.62328	0.01392	39	3	0.0001148	5.108e-05	0.00199	0.16884	0.00287	12.7197	0.23198	0.49953	0.0077	0.9004	0.18468	0.00148	2611.78	33.2	2659.12	17.32	2695.33	13.27	3.1	2700
	9122-15.1	155.94	122.58	0.81208	0.01685	95	1	1.521e-05	1.744e-05	0.00026	0.22738	0.00232	12.8901	0.23205	0.50241	0.00768	0.9032	0.18608	0.00145	2624.13	33.04	2671.65	17.11	2707.82	12.91	3.1	2700
	9122-16.1	145.08	96.78	0.68909	0.01472	86	2	2.439e-05	1.314e-05	0.00042	0.18661	0.0017	12.7173	0.23405	0.50075	0.00754	0.8787	0.18419	0.00163	2617	32.49	2658.94	17.47	2691	14.71	2.7	2700
	9122-17.1	96.01	93.33	1.0042	0.02108	62	1	3.175e-05	2.168e-05	0.00055	0.28047	0.00496	12.9182	0.23352	0.50875	0.00793	0.9132	0.18416	0.00137	2651.29	33.96	2673.71	17.18	2690.7	12.32	1.5	2700
	9122-18.1	62.51	48.21	0.79683	0.01894	38	3	0.00012615	4.619e-05	0.00219	0.21965	0.00447	12.4991	0.32222	0.49765	0.00866	0.7573	0.18216	0.00309	2603.7	37.38	2642.66	24.53	2672.62	28.37	2.6	2700
	9122-19.1	217.38	77.62	0.36888	0.00812	121	2	1.706e-05	9.72e-06	0.0003	0.09989	0.00102	12.856	0.1978	0.50368	0.00734	0.975	0.18512	0.00064	2629.58	31.54	2669.16	14.6	2699.28	5.7	2.6	2700
	9122-21.1	103.08	89.6	0.89799	0.01976	63	1	1.526e-05	1.842e-05	0.00026	0.24659	0.00408	12.3558	0.21603	0.49655	0.00792	0.9512	0.18047	0.00098	2598.97	34.21	2631.82	16.56	2657.19	9.04	2.2	2700
	9122-22.1	40.37	33.15	0.84827	0.01988	24	2	9.131e-05	0.00010128	0.00158	0.23399	0.00488	12.3873	0.27691	0.49794	0.0081	0.8029	0.18042	0.00242	2604.95	34.96	2634.21	21.22	2656.78	22.44	2	2700
	9122-23.1	71.38	47.47	0.6871	0.01559	42	1	4.692e-05	2.93e-05	0.00081	0.19001	0.00253	12.4498	0.25552	0.49907	0.00785	0.8354	0.18093	0.00206	2609.8	33.83	2638.95	19.48	2661.37	18.97	1.9	2700
	9122-24.1	42.58	38.28	0.92854	0.02059	26	2	0.00012298	0.0002432	0.00213	0.25725	0.0097	12.4725	0.3877	0.49662	0.00869	0.6577	0.18215	0.0043	2599.23	37.53	2640.66	29.65	2672.55	39.61	2.7	2700
	9122-25.1	341.61	72.65	0.21969	0.00602	180	2	1.53e-05	8.28e-06	0.00027	0.06072	0.00151	12.262	0.27258	0.49453	0.00714	0.7352	0.17983	0.00273	2590.26	30.89	2624.67	21.09	2651.31	25.42	2.3	2700
	9122-26.1	48.66	27.94	0.59322	0.01482	29	2	8.768e-05	4.159e-05	0.00152	0.16296	0.00397	13.1127	0.25802	0.5129	0.00791	0.85	0.18542	0.00194	2668.99	33.78	2687.8	18.74	2701.98	17.35	1.2	2700
	9122-27.1	52.55	51.84	1.01913	0.02262	33	2	9.079e-05	5.442e-05	0.00157	0.28386	0.00407	12.4303	0.26883	0.49396	0.00821	0.8375	0.18251	0.00217	2587.77	35.53	2637.47	20.53	2675.83	19.85	3.3	2700
	9122-28.1	78.86	120.73	1.58168	0.21247	57	1	3.689e-05	2.546e-05	0.00064	0.41871	0.03411	13.1666	1.66799	0.52151	0.04286	0.7343	0.18311	0.01587	2705.58	184.2	2691.66	127.2	2681.23	151.05	-0.9	2700
	9122-29.1	65.37	42.23	0.66737	0.0145	39	2	7.031e-05	3.095e-05	0.00122	0.17847	0.00313	12.7206	0.23499	0.50356	0.00778	0.8929	0.18321	0.00154	2629.06	33.44	2659.18	17.54	2682.18	13.93	2	2700
	9122-30.1	85.87	36.82	0.44297	0.01066	48	2	4.46e-05	2.559e-05	0.00077	0.11987	0.00187	12.6906	0.26105	0.50335	0.00812	0.8508	0.18286	0.00199	2628.19	34.93	2656.96	19.55	2678.94	18.14	1.9	2700
	9122-31.1	110.65	20.59	0.19221	0.00483	59	1	2.064e-05	2.48e-05	0.00036	0.05329	0.00136	12.6943	0.23197	0.5003	0.00764	0.8924	0.18402	0.00153	2615.1	32.91	2657.23	17.35	2689.47	13.8	2.8	2700
	9122-32.1	150.7	85.29	0.58468	0.01226	88	1	2.029e-05	1.336e-05	0.00035	0.16259	0.00177	12.6769	0.20646	0.50398	0.00754	0.9557	0.18243	0.00088	2630.89	32.4	2655.95	15.44	2675.09	8.02	1.7	2700
	9122-33.1	206.64	113.58	0.56783	0.01181	118	1	1.327e-05	1.251e-05	0.00023	0.16336	0.002	12.2072	0.20527	0.49511	0.00751	0.9437	0.17882	0.001	2592.74	32.46	2620.46	15.9	2641.95	9.34	1.9	2700
	9122-34.1	112.41	82.47	0.75793	0.01583	69	1	2.252e-05	1.623e-05	0.00039	0.20618	0.00294	12.9647	0.26296	0.50893	0.00821	0.86	0.18476	0.00193	2652.04	35.19	2677.09	19.3	2696.06	17.33	1.6	2700
	9122-35.1	106.48	103.76	1.00666	0.02116	68	1	3.001e-05	1.819e-05	0.00052	0.28139	0.00251	12.8074	0.22862	0.5067	0.0079	0.9221	0.18332	0.00128	2642.54	33.89	2665.59	16.95	2683.12	11.56	1.5	2700
	9122-36.1	43.16	29.72	0.71126	0.01675	27	1	4.409e-05	4.384e-05	0.00076	0.19183	0.00631	13.4729	0.29415	0.51876	0.00972	0.9105	0.18836	0.00171	2693.9	41.4	2713.39	20.85	2727.92	15.06	1.2	2700
	9122-37.1	70.49	51.21	0.75058	0.01725	43	2	7.36e-05	4.671e-05	0.00128	0.20975	0.00282	12.5886	0.2497	0.50528	0.00798	0.8602	0.18069	0.00184	2636.43	34.26	2649.37	18.83	2659.26	17	0.9	2700
	9122-39.1	98.74	47.9	0.50121	0.01273	51	1	3.679e-05	2.083e-05	0.00064	0.13379	0.00204	10.5219	0.18314	0.46568	0.00722	0.9349	0.16387	0.00102	2464.6	31.81	2481.85	16.27	2496.01	10.52	1.3	2700
	9122-38.1	57.31	67.16	1.21055	0.03058	39	3	0.00012013	4.302e-05	0.00208	0.33399	0.00423	13.3301	0.26969	0.51792	0.00942	0.9412	0.18667	0.00129	2690.35	40.11	2703.32	19.29	2713.02	11.41	0.8	2700
	9122-41.1	30.69	15.54	0.52312	0.017	19	1	8.015e-05	5.824e-05	0.00139	0.14753	0.0049	14.4715	0.3293	0.52661	0.00866	0.7983	0.19931	0.00275	2727.13	36.66	2781.13	21.84	2820.54	22.74	3.3	2700
	9122-42.1	86.14	34.62	0.41516	0.00907	50	3	8.652e-05	3.177e-05	0.0015	0.10946	0.00189	13.5113	0.22936	0.52345	0.00787	0.9311	0.1872	0.00117	2713.81	33.37	2716.07	16.18	2717.76	10.32	0.1	2700
	9122-43.1	79.81	59.2	0.76627	0.01969	49	0	1.031e-05	4.287e-05	0.00018	0.20918	0.00466	12.7529	0.23012	0.50793	0.00805	0.9257	0.1821	0.00125	2647.8	34.49	2661.57	17.13	2672.05	11.44	0.9	2700
	9122-44.1	40.79	21.37	0.54122	0.01254	23	1	8.451e-05	4.825e-05	0.00146	0.14921	0.00356	12.5189	0.26922	0.49892	0.00926	0.9143	0.18198	0.0016	2609.16	39.96	2644.14	20.43	2671.02	14.61	2.3	2700
	9122-45.1	124.06	83.45	0.69494	0.01467	75	1	2.14e-05	1.715e-05	0.00037	0.1919	0.00176	12.944	0.23512	0.50764	0.00833	0.945	0.18493	0.00111	2646.54	35.73	2675.58	17.27	2697.6	9.92	1.9	2700
	9122-46.1	118.37	46.26	0.4037	0.01023	67	0	9.69e-06	1.457e-05	0.00017	0.11134	0.00297	12.5465	0.2173	0.50696	0.00775	0.9289	0.17949	0.00116	2643.65	33.23	2646.22	16.42	2648.18	10.76	0.2	2700
	9122-48.1	188.12	158.14	0.86841	0.0234	116	2	3.047e-05	1.271e-05	0.00053	0.23585	0.00155	12.795	0.19616	0.50428	0.00725	0.9692	0.18402	0.0007	2632.16	31.16	2664.67	14.54	2689.44	6.31	2.1	2700
	9122-49.1	247.3	226.29	0.94531	0.02012	158	3	2.703e-05	1.036e-05	0.00047	0.26261	0.00146	13.0189	0.199	0.51203	0.00736	0.9709	0.18441	0.00068	2665.3	31.47	2681.02	14.52	2692.9	6.11	1	2700
	9122-50.1	71.74	33.41	0.48112	0.0131	41	1	3.753e-05	3.664e-05	0.00065	0.13524	0.00218	12.4388	0.20946	0.5021	0.00745	0.9279	0.17967	0.00114	2622.83	32.05	2638.11	15.95	2649.86	10.53	1	2700
	9122-53.1	184.36	117.25	0.65701	0.01358	109	4	4.643e-05	1.549e-05	0.0008	0.17765	0.00184	12.7305	0.20058	0.50551	0.00743	0.9654	0.18265	0.00076	2637.45	31.88	2659.92	14.94	2677.05	6.87	1.5	2700
	9122-54.1	55.96	21.31	0.39345	0.00987	32	1	4.937e-05	3.548e-05	0.00086	0.11056	0.0025	13.5827	0.29051	0.51891	0.00893	0.867	0.18984	0.00204	2694.55	37.99	2721.06	20.43	2740.8	17.78	1.7	2700
	9122-55.1	163.2	63.43	0.40149	0.00923	84	1	1.665e-05	1.618e-05	0.00029	0.11183	0.00286	10.6077	0.16487	0.4718	0.00681	0.9625	0.16307	0.00069	2491.43	29.88	2489.39	14.53	2487.72	7.18	-0.1	2700
	9122-56.1	48.99	48.4	1.02075	0.02814	31	2	7.08e-05	4.909e-05	0.00123	0.2705	0.00597	13.2372	0.26815	0.51125	0.00843	0.8748	0.18778	0.00186	2661.98	36.05	2696.72	19.31	2722.85	16.39	2.2	2700
	9122-57.1	119.12	75.48	0.65461	0.01376	71	1	1.164e-05	1.443e-05	0.0002	0.18051	0.00236	12.8974	0.22537	0.50476	0.00773	0.9247	0.18532	0.00124	2634.21	33.21	2672.18	16.6	2701.05	11.12	2.5	2700
	9122-58.1	53.16	48.7	0.94636	0.02723	33	2	6.966e-05	7.478e-05	0.00121	0.26527	0.01559	12.1285	1.04852	0.49277	0.03214	0.8255	0.17851	0.00878	2582.67	140.3	2614.39	84.52	2639.05	84.08	2.1	2700
	9122-59.1	109.52	92.89	0.87617	0.01939	68	2	4.321e-05	2.088e-05	0.00075	0.24338	0.00209	12.4471	0.20857	0.50332	0.00733	0.9191	0.17936	0.00119	2628.06	31.52	2638.74	15.87	2646.94	11.09	0.7	2700
	9122-60.1	52.17	35.73	0.70753	0.01571	31	2	6.689e-05	4.576e-05	0.00116	0.19518	0.0029	13.0218	0.24533	0.50522	0.00763	0.8651	0.18693	0.00178	2636.19	32.77	2681.24	17.92	2715.38	15.79	2.9	2700
	9122-61.1	73.57	37.87	0.53182	0.01174	44	1	3.157e-05	2.768e-05	0.00055	0.14362	0.00213	13.6344	0.25525	0.5194	0.00841	0.9159	0.19039	0.00144	2696.64	35.8	2724.66	17.87	2745.49	12.51	1.8	2700
	9122-64.1	73.65	33.03	0.46333	0.01084	42	0	1.512e-05	2.548e-05	0.00026	0.12404	0.00228	12.7347	0.23385	0.50561	0.00807	0.919	0.18267	0.00133	2637.88	34.65	2660.23	17.44	2677.26	12.13	1.5	2700
	9122-65.1	47.48	39.41	0.85756	0.01907	29	3	0.00013048	5.019e-05	0.00226	0.23738	0.00664	12.2567	0.28067	0.4935	0.00813	0.7955	0.18013	0.00252	2585.78	35.18	2624.26	21.73	2654.08	23.38	2.6	2700
	9122-63.1	42.24	12.17	0.29763	0.00873	23	2	9.002e-05	5.481e-05	0.00156	0.07736	0.00322	12.6635	0.25762	0.50562	0.00887	0.9132	0.18165	0.00152	2637.9	38.07	2654.95	19.33	2667.98	13.9	1.1	2700
	9122-66.1	94.45	80.21	0.87731	0.0188	59	1	3.629e-05	2.255e-05	0.00063	0.24464	0.00426	12.7621	0.26573	0.50485	0.00823	0.8492	0.18334	0.00203	2634.61	35.34	2662.25	19.8	2683.32	18.44	1.8	2700
	9122-67.1	79.83	61.36	0.79399	0.05336	48	3	8.618e-05	3.394e-05	0.00149	0.21111	0.00843	12.4647	0.77143	0.50275	0.02228	0.7928	0.17981	0.00684	2625.62	96.29	2640.07	59.91	2651.16	64.48	1	2700
	9122-69.1	62.92	65.45	1.07474	0.02453	41	3	9.097e-05	4.68e-05	0.00158	0.29894	0.00371	13.1014	0.26358	0.51218	0.00784	0.8309	0.18552	0.00209	2665.92	33.5	2686.98	19.16	2702.86	18.75	1.4	2700
	9122-71.1	55.91	25.27	0.46691	0.01048	37	1	2.038e-05	5.47e-05	0.00035	0.12903	0.00447	16.9006	0.29285	0.56693	0.00855	0.9201	0.21621	0.00148	2895.22	35.29	2929.21	16.75	2952.65	11.09	1.9	2700
	9122-73.1	53.66	26.03	0.50111	0.01331	33	1	4.935e-05	4.528e-05	0.00086	0.14019	0.00271	14.5351	0.29277	0.53116	0.00951	0.9337	0.19847	0.00144	2746.32	40.15	2785.3	19.32	2813.65	11.93	2.4	2700
	9122-76.1	84.35	66.42	0.81352	0.01755	52	1	3.851e-05	3.675e-05	0.00067	0.22132	0.0025	12.6408	0.2319	0.50622	0.00822	0.9309	0.18111	0.00122	2640.49	35.27	2653.27	17.41	2663.02	11.23	0.8	2700
	9122-77.1	28.2	8.63	0.3163	0.00974	17	1	6.602e-05	6.011e-05	0.00114	0.08355	0.00319	14.5226	0.33477	0.53134	0.01037	0.9013	0.19823	0.002	2747.08	43.8	2784.48	22.14	2811.69	16.55	2.3	2700
																											2700
	Notes (see Stern, 1997):
	Spot name follows the convention x-y.z; where x = sample number, y = grain number and z = spot number. Multiple analyses in an individual spot are labelled as x-y.z.z
	Uncertainties reported at 1s (absolute) and are calculated by numerical propagation of all known sources of error
	f(206)204 refers to mole fraction of total 206Pb that is due to common Pb, calculated using the 204Pb-method; common Pb composition used is the surface blank (4/6: 0.05770; 7/6: 0.89500; 8/6: 2.13840)
	* refers to radiogenic Pb (corrected for common Pb)
	Discordance relative to origin = 100 * (1-(206Pb/238U age)/(207Pb/206Pb age))
	Calibration standard 6266; U = 910 ppm; Age = 559 Ma; 206Pb/238U = 0.09059
	Th/U calibration: F = 0.03900*UO + 0.85600
	Sesion Mount:	IP420	IP421
	Scans:	5	5
	Deadtime (ns)	23	23
	O- Primary Beam (nA)	~9	~8
	Calibration uncertainty	0.014	0.01
	Kohler aperture (mm)	120	120
	Beam diameter (mm)	17x23	17x23

## Sheet: Nastapoka Gp (Manitounuk Spgp)
Sample/section	Notes	Height (m)	Formation	Member	δ13C (‰; VPDB)	δ18O (‰; VPDB)	Sampling Site Latitude	Sampling Site Longitude
MN1701	Carbonates at base of Nastapoka Group on mainland	0.95	Sivraaluk	-	-2.76344	-7.17801	56.1581	76.5943
MN1701	Carbonates at base of Nastapoka Group on mainland	2.1	Sivraaluk	-	-1.43344	-5.79594	56.1581	76.5943
MN1701	Carbonates at base of Nastapoka Group on mainland	3.4	Sivraaluk	-	-1.41488	-6.45275	56.1581	76.5943
MN1701	Carbonates at base of Nastapoka Group on mainland	4.8	Sivraaluk	-	-1.28711	-6.65374	56.1581	76.5943
MN1701	Carbonates at base of Nastapoka Group on mainland	6	Sivraaluk	-	-1.45856	-6.95709	56.1581	76.5943
MN1701	Carbonates at base of Nastapoka Group on mainland	8.4	Sivraaluk	-	-1.53511	-6.94094	56.1581	76.5943
MN1701	Carbonates at base of Nastapoka Group on mainland	9.2	Sivraaluk	-	-0.992905	-5.64856	56.1581	76.5943
MN1701	Carbonates at base of Nastapoka Group on mainland	10.4	Sivraaluk	-	-0.495276	-6.14553	56.1581	76.5943
MN1701	Carbonates at base of Nastapoka Group on mainland	12	Sivraaluk	-	-0.780471	-6.43462	56.1581	76.5943
MN1701	Carbonates at base of Nastapoka Group on mainland	13.3	Sivraaluk	-	-1.22747	-7.72838	56.1581	76.5943
MN1701	Carbonates at base of Nastapoka Group on mainland	14.9	Sivraaluk	-	-1.30033	-6.36581	56.1581	76.5943
MN1701	Carbonates at base of Nastapoka Group on mainland	16.1	Sivraaluk	-	-0.733469	-5.1659	56.1581	76.5943
MN1701	Carbonates at base of Nastapoka Group on mainland	18	Sivraaluk	-	-1.01457	-7.24819	56.1581	76.5943
MN1701	Carbonates at base of Nastapoka Group on mainland	19.1	Sivraaluk	-	-0.593754	-5.8671	56.1581	76.5943
MN1701	Carbonates at base of Nastapoka Group on mainland	20	Sivraaluk	-	-0.818531	-5.89279	56.1581	76.5943
MN1701	Carbonates at base of Nastapoka Group on mainland	21.5	Sivraaluk	-	-0.962909	-6.40344	56.1581	76.5943
MN1701	Carbonates at base of Nastapoka Group on mainland	22.5	Sivraaluk	-	-1.20945	-7.31433	56.1581	76.5943
MN1701	Carbonates at base of Nastapoka Group on mainland	23.9	Sivraaluk	-	-1.61952	-7.87419	56.1581	76.5943
MN1701	Carbonates at base of Nastapoka Group on mainland	26.3	Sivraaluk	-	-1.68826	-7.06315	56.1581	76.5943
MN1701	Carbonates at base of Nastapoka Group on mainland	29	Sivraaluk	-	-0.758443	-7.47404	56.1581	76.5943
MN1701	Carbonates at base of Nastapoka Group on mainland	30.7	Sivraaluk	-	-0.203514	-6.37994	56.1581	76.5943
MN1701	Carbonates at base of Nastapoka Group on mainland	32.8	Sivraaluk	-	-1.88816	-8.09943	56.1581	76.5943
MN1701	Carbonates at base of Nastapoka Group on mainland	33.9	Sivraaluk	-	-1.03732	-7.26157	56.1581	76.5943
MN1701	Carbonates at base of Nastapoka Group on mainland	35.6	Sivraaluk	-	-2.16225	-8.13993	56.1581	76.5943
MN1701	Carbonates at base of Nastapoka Group on mainland	37.1	Sivraaluk	-	-1.0372	-5.93539	56.1581	76.5943
MN1701	Carbonates at base of Nastapoka Group on mainland	38	Sivraaluk	-	-0.319176	-4.09284	56.1581	76.5943
MN1701	Carbonates at base of Nastapoka Group on mainland	39.5	Sivraaluk	-	-0.206946	-4.32509	56.1581	76.5943
MN1701	Carbonates at base of Nastapoka Group on mainland	41.6	Sivraaluk	-	-1.01496	-5.20155	56.1581	76.5943
MN1701	Carbonates at base of Nastapoka Group on mainland	43.7	Sivraaluk	-	-0.855453	-4.83489	56.1581	76.5943
MN1701	Carbonates at base of Nastapoka Group on mainland	45.6	Sivraaluk	-	-1.39817	-7.23604	56.1581	76.5943
MN1701	Carbonates at base of Nastapoka Group on mainland	48.1	Sivraaluk	-	-1.2162	-6.28581	56.1581	76.5943
MN1701	Carbonates at base of Nastapoka Group on mainland	50.3	Sivraaluk	-	-0.720631	-6.6725	56.1581	76.5943
MN1701	Carbonates at base of Nastapoka Group on mainland	51.8	Sivraaluk	-	-0.556914	-7.62186	56.1581	76.5943
MN1701	Carbonates at base of Nastapoka Group on mainland	53.3	Sivraaluk	-	-0.555943	-7.35065	56.1581	76.5943
MN1703	Stratigraphically lowest carbonates on Belanger Island	5.6	unnamed	-	-0.446915	-6.25276	56.132	76.7071
MN1703	Stratigraphically lowest carbonates on Belanger Island	2.3	unnamed	-	-0.665764	-6.21508	56.132	76.7071
MN1703	Stratigraphically lowest carbonates on Belanger Island	8	unnamed	-	-0.458965	-7.09187	56.132	76.7071
MN1703	Stratigraphically lowest carbonates on Belanger Island	4.4	unnamed	-	-0.804573	-6.67677	56.132	76.7071
MN1703	Stratigraphically lowest carbonates on Belanger Island	3.5	unnamed	-	-0.563539	-5.89165	56.132	76.7071
MN1703	Stratigraphically lowest carbonates on Belanger Island	7.5	unnamed	-	-0.490611	-6.45093	56.132	76.7071
MN1703	Stratigraphically lowest carbonates on Belanger Island	6.6	unnamed	-	-0.761973	-6.93346	56.132	76.7071

## Sheet: Thompson Belt
Sample/section	Notes	Depth (-ft)	Formation	Member	δ13C (‰; VPDB)	δ18O (‰; VPDB)
97-06-C01	-	-	Pipe Formation	P3	0.1	-13.1
97-06-C03	-	-	Pipe Formation	P3	1.2	-6.2
Drillcore 862721	-	5653'	Thompson Formation, base of the Ospwagan Formation	-	-1.2	-9.7
Drillcore 38605	-	900'	Thompson Formation, base of the Ospwagan Formation	-	1.7	-9.9
JM-2010-6	Drillcore 1151230	1288'	Thompson Formation	-	-0.589234	-10.5763
JM-2010-7	Drillcore 1151230	1088'	Thompson Formation	-	0.914891	-10.9245
JM-2010-8	Drillcore 1151230	977'	Thompson Formation	-	0.665909	-12.987
JM-2010-10	Drillcore 1151230	811'	Thompson Formation	-	0.522617	-11.4057
JM-2010-11	Drillcore 862721	5392'	Pipe Formation	P3	-3.48813	-9.29618
JM-2010-12	Drillcore 862721	5394'	Pipe Formation	P3	-1.8169	-9.32266
JM-2010-13	Drillcore 862721	5398'	Pipe Formation	P3	-1.79962	-9.46509
JM-2010-14	Drillcore 862721	5652'	Pipe Formation (P3) or Thompson Formation	-	0.28056	-9.87091
JM-2010-15	Drillcore 862721	5654'	Pipe Formation (P3) or Thompson Formation	-	-0.347691	-10.2298
JM-2010-16	Drillcore 862721	5651'	Pipe Formation (P3) or Thompson Formation	-	-0.853886	-11.1066
JM-2010-18	-	-	Pipe Formation	P3	1.27696	-5.02654
